# Supplementary material for: 膀胱憩室症例(1)膀胱腫瘍兼膀胱憩室(2)膀胱腫瘍兼膀胱憩室腫瘍 : 第208回北海道地方会
Source: Royal Society of Chemistry journal article supplement (doi:10.1039/d4ob00797b), 1973-01-01

## Supporting Information

### Isoxazole group directed Rh(III)-catalyzed alkynylation using TIPS-EBX

Sukanya Das<sup>a</sup>, Tanmoy Datta<sup>b#</sup>, Md. Abbasuddin Sk<sup>a#</sup>, Dr. Brindaban Roy<sup>b</sup> & Dr. Raj Kumar Nandi<sup>a\*</sup>

<sup>a</sup>Department of Chemistry, 188, Raja S.C. Mallick Rd, Jadavpur, Kolkata, West Bengal 700032

<sup>b</sup>Department of Chemistry, University of Kalyani, Kalyani, nadia, West Bengal 741235

# Both have the Equal Contribution on second authorship.

\*Corresponding Author Email: [rkn.chemistry@jadavpuruniversity.in](mailto:rkn.chemistry@jadavpuruniversity.in)

| Table of Content                                                                                       | Page No. |
|--------------------------------------------------------------------------------------------------------|----------|
| 1. Experimental section                                                                                | S2       |
| 2. General procedure for the preparation of starting materials                                         | S2-S3    |
| 3. Experimental data of unreported starting materials                                                  | S3-S4    |
| 4. Optimization of the reaction in different conditions and with different hypervalent iodine reagents | S4-S5    |
| 5. General procedure for the synthesis of alkynylated derivatives                                      | S6       |
| 6. Characterization of products                                                                        | S6-S16   |
| 7. Product modification                                                                                | S16-S18  |
| 8. Mechanistic Study                                                                                   | S18-S21  |
| 9. References                                                                                          | S22      |
| 10. X-ray crystallographic data                                                                        | S22-S23  |
| 11. Copies of NMR-spectra                                                                              | S24-S56  |

## 1. Experimental Section:

The glassware used for all the reactions was oven-dried. Unless otherwise indicated, all the chemicals and solvents were purchased from Sigma-Aldrich, Spectrochem, TCI, and BLDPharm, Rankem India pvt. Ltd. and used as such. Silica gel [(60-120, 230-400 mesh), Rankem, India] was used for chromatographic separation. Petroleum ether (refers to the fraction boiling between 60 °C and 80 °C). Melting points were determined in open capillaries and are uncorrected. IR spectra ( $\nu_{\max}$  in  $\text{cm}^{-1}$ ) were recorded on a Perkin-Elmer L 1600300 spectrum TWO LiTa ( $\nu_{\max}$  in  $\text{cm}^{-1}$ ) solid and neat for liquid samples ATR mode.  $^1\text{H}$  NMR and  $^{13}\text{C}$  NMR spectra were recorded on Bruker DPX-300 and Bruker DPX-400 spectrometer in  $\text{CDCl}_3$  and  $d^6$ -DMSO with TMS as internal standard (chemical shift in  $\delta$ ). HRMS mass spectra were recorded on waters quadruple time of flight mass spectrometer (XEVOG2 Q-TOF).

## 2. General Procedure:

### Procedure for the Synthesis of Cyclic Hypervalent Iodine Reagents:

Cyclic hypervalent iodine reagents (**2**<sup>S1a</sup>, **2A**<sup>S1d</sup>, **2B**<sup>S1c</sup>, **2C**<sup>S1b</sup>, **2D**<sup>S1c</sup>, **2E**<sup>S1b</sup>, **2F**<sup>S1c</sup>, **2G**<sup>S1e</sup>) were prepared in laboratory by following the reported procedure<sup>S1a-e</sup>.

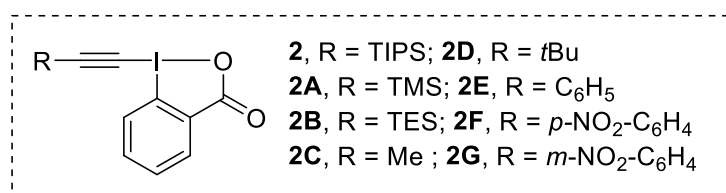

### Procedure for the Synthesis of Isoxazole and isooxazoline derivatives:

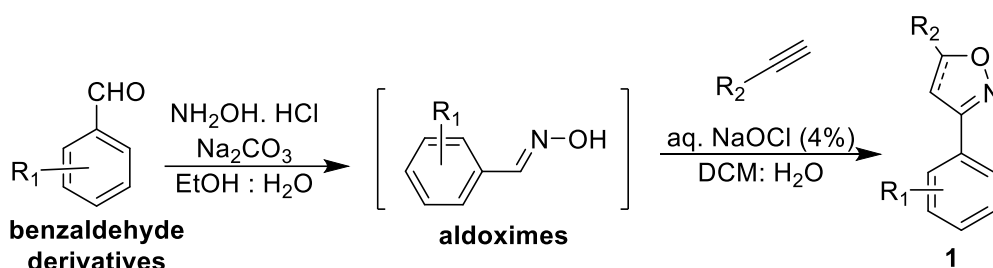

Isoxazole/isooxazoline derivatives **1** were prepared by initial aldoxime formation<sup>S2</sup> from commercially available aldehydes (1 equiv.) using hydroxylamine hydrochloride (2 equiv.) and  $\text{Na}_2\text{CO}_3$  (2 equiv.) in EtOH/  $\text{H}_2\text{O}$  (v:v = 6:1). The reaction mixture was stirred 3-4 h at room temperature. On completion (monitoring by TLC), the reaction mixture was diluted with water and extracted with EtOAc (3 x 10 ml). The combined organic extracts were dried over anhydrous  $\text{Na}_2\text{SO}_4$  and concentrated by rotary evaporation under reduced pressure to give a residue, which was purified by using column chromatography to afford aldoxime derivatives in

excellent yields (61-93%).

By following the reported procedure<sup>S3</sup>, To a stirred solution of obtained aldoximes (1 equiv.) in DCM/H<sub>2</sub>O (v:v = 6:1), alkynes/alkenes (1 equiv.) were added and the reaction mixture was stirred for 10 minutes at room temperature. Then, aq. NaOCl (4%) (2 equiv.) was added slowly and the reaction was further stirred for 3-4 h. After completion (confirmed by TLC), water was added and product was extracted with EtOAc (3 × 10 ml). The organic layer was collected, dried on anhydrous Na<sub>2</sub>SO<sub>4</sub> and solvent was evaporated on rotary evaporator to get the crude product. The crude product was purified by column chromatography to get pure isoxazole/isoxazoline products.

| Known Substrates                                                                                                                                                                                                                                                                                                                                                              | Unknown Substrates    |
|-------------------------------------------------------------------------------------------------------------------------------------------------------------------------------------------------------------------------------------------------------------------------------------------------------------------------------------------------------------------------------|-----------------------|
| <b>1a<sup>S4</sup>, 1b<sup>S5</sup>, 1c<sup>S4</sup>, 1d<sup>S6</sup>, 1e<sup>S7</sup>, 1f<sup>S8</sup>, 1g<sup>S4</sup>, 1h<sup>S4</sup>, 1j<sup>S5</sup>, 1k<sup>S8</sup>, 1l<sup>S7</sup>, 1m<sup>S9</sup>, 1n<sup>S6</sup>, 1o<sup>S7</sup>, 1q<sup>S12</sup>, 1r<sup>S9</sup>, 1s<sup>S9</sup>, 1t<sup>S10</sup>, 1u<sup>S11</sup>, 1v<sup>S4</sup>, 1w<sup>S4</sup></b> | <b>1i, 1p, 1x, 1y</b> |

### 3. Experimental Data for unreported substrates 1i, 1p, 1x,y:

#### 3-(4-iodophenyl)-5-phenylisoxazole (1i)

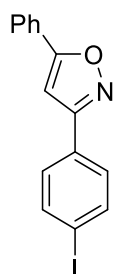

Following the general procedure, **1i** was isolated in 92% yield (647 mg, 1.864 mmol; from the 500 mg of corresponding oxime and 0.22 mL phenyl acetylene);

Yellow solid. m.p. 150-152 °C; R<sub>f</sub> (9.5:0.5 Hexane /Ethyl acetate) = 0.6;

**<sup>1</sup>H NMR (300 MHz, CDCl<sub>3</sub>)** δ 7.86 – 7.81 (m, 4H), 7.63 – 7.58 (m, 2H), 7.53 – 7.46 (m, 3H), 6.81 (s, 1H).

**<sup>13</sup>C NMR (101 MHz, CDCl<sub>3</sub>)** δ 170.7, 162.2, 138.1, 130.4, 129.0, 128.6, 128.4, 127.2, 125.8, 97.2, 96.2.

#### 3-(2-bromo-5-fluorophenyl)-5-phenylisoxazole (1p)

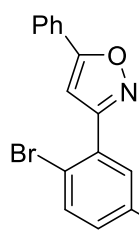

Following the general procedure, **1p** was isolated in 89% yield (260 mg, 0.817 mmol; from the 200 mg of corresponding oxime and 0.1 mL phenyl acetylene); white solid. m.p. 128-130 °C R<sub>f</sub> (9.5:0.5 Hexane /Ethyl acetate) = 0.6;

**<sup>1</sup>H NMR (300 MHz, CDCl<sub>3</sub>)** δ 7.87 – 7.83 (m, 2H), 7.67 (dd, J = 9, 5.1 Hz, 1H), 7.54 – 7.44 (m, 4H), 7.10-7.04 (m, 1H), 6.98 (s, 1H).

**<sup>13</sup>C NMR (75 MHz, CDCl<sub>3</sub>)** δ 170.0, 163.4, 135.1, 134.9, 130.4, 129.1, 127.2, 125.9, 118.6, 118.4, 118.2, 118.1, 100.5.

#### 5-(4-methoxyphenyl)-3-(o-tolyl)isoxazole (1x)

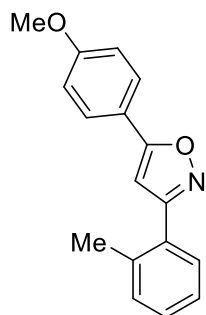

Following the general procedure, **1x** was isolated in 87% yield (255 mg, 0.961 mmol; from the 150 mg of corresponding oxime and 147 mg *p*-methoxyphenyl acetylene); yellow liquid.  $R_f$  (9.0:1.0 Hexane /Ethyl acetate) = 0.6;

$^1\text{H NMR}$  (300 MHz,  $\text{CDCl}_3$ )  $\delta$  7.81 – 7.76 (m, 2H), 7.55 (dd,  $J = 7.5, 1.8$  Hz, 1H), 7.39 – 7.28 (m, 3H), 7.03 – 6.98 (m, 2H), 6.57 (s, 1H), 3.88 (s, 3H), 2.52 (s, 3H).

$^{13}\text{C NMR}$  (75 MHz,  $\text{CDCl}_3$ )  $\delta$  169.4, 163.5, 161.0, 136.8, 131.0, 129.3, 129.37, 128.9, 127.4, 125.9, 120.3, 114.3, 98.8, 55.3, 21.1.

### 5-(3-nitrophenyl)-3-(o-tolyl)isoxazole (1y)

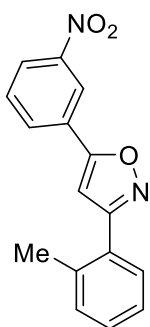

Following the general procedure, **1y** was isolated in 87% yield (180 mg, 0.642 mmol; from the 100 mg of corresponding oxime and 109 mg *m*-nitrophenyl acetylene); off-white solid. m.p. 58-60 °C;  $R_f$  (9.0:1.0 Hexane /Ethyl acetate) = 0.6;

$^1\text{H NMR}$  (400 MHz,  $\text{CDCl}_3$ )  $\delta$  8.67 (t,  $J = 2.0$  Hz, 1H), 8.33-8.30 (m, 1H), 8.20-8.17 (m, 1H), 7.71 (t,  $J = 8.0$  Hz, 1H), 7.56 (dd,  $J = 7.6, 1.6$  Hz, 1H), 7.41-7.29 (m, 3H), 6.87 (s, 1H), 2.54 (s, 3H).

$^{13}\text{C NMR}$  (75 MHz,  $\text{CDCl}_3$ )  $\delta$  166.8, 163.9, 148.6, 136.9, 131.3, 131.1, 130.2, 129.8, 129.4, 128.9, 128.1, 126.1, 124.5, 120.7, 101.8, 21.1.

## 4. (A) Optimization of Reaction Conditions (Table S1):

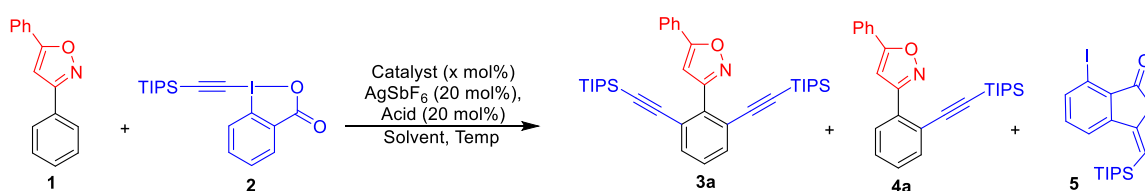

| entry | Catalyst (% loading)                    | TIPS-EBX (equiv.) | acid (20 mol%) | solvent | $t$ (°C) | time (h) | yield (%) |           |       |
|-------|-----------------------------------------|-------------------|----------------|---------|----------|----------|-----------|-----------|-------|
|       |                                         |                   |                |         |          |          | Di (3a)   | Mono (4a) | Pdt-5 |
| 1.    | $[\text{RhCp}^*\text{Cl}_2]_2$ (4 mol%) | 1.1               | PivOH          | DCE     | rt       | 48       | 5         | 13        | ND    |
| 2.    | $[\text{RhCp}^*\text{Cl}_2]_2$ (4 mol%) | 1.1               | PivOH          | DCM     | rt-90    | 22       | 8         | 29        | ND    |
| 3.    | $[\text{RhCp}^*\text{Cl}_2]_2$ (4 mol%) | 1.1               | PivOH          | toluene | rt-90    | 22       | 2         | 14        | ND    |
| 4.    | $[\text{RhCp}^*\text{Cl}_2]_2$ (4 mol%) | 1.1               | PivOH          | THF     | rt-90    | 22       | 9         | 29        | ND    |

|     |                                                                      |            |                               |                   |           |          |           |          |           |
|-----|----------------------------------------------------------------------|------------|-------------------------------|-------------------|-----------|----------|-----------|----------|-----------|
| 5.  | [RhCp*Cl <sub>2</sub> ] <sub>2</sub><br>(4 mol%)                     | 1.1        | PivOH                         | Et <sub>2</sub> O | rt-90     | 22       | 2         | 23       | ND        |
| 6.  | [RhCp*Cl <sub>2</sub> ] <sub>2</sub><br>(4 mol%)                     | 1.1        | PivOH                         | EtOH              | rt-90     | 22       | 7         | 32       | ND        |
| 7.  | [RhCp*Cl <sub>2</sub> ] <sub>2</sub><br>(4 mol%)                     | 1.1        | PivOH                         | TFE               | rt-90     | 22       | 34        | 25       | ND        |
| 8.  | [RhCp*Cl <sub>2</sub> ] <sub>2</sub><br>(4 mol%)                     | 1.1        | PivOH                         | HFIP              | rt-90     | 22       | 37        | 29       | ND        |
| 9.  | [RhCp*Cl <sub>2</sub> ] <sub>2</sub><br>(4 mol%)                     | 1.1        | -                             | HFIP              | rt-90     | 56       | 29        | 8        | ND        |
| 10. | [RhCp*Cl <sub>2</sub> ] <sub>2</sub><br>(4 mol%)                     | 1.1        | NaOAc                         | HFIP              | 90        | 6        | ND        | 5        | 67        |
| 11. | [RhCp*Cl <sub>2</sub> ] <sub>2</sub><br>(4 mol%)                     | 2.0        | PivOH                         | HFIP              | 90        | 22       | 67        | 17       | ND        |
| 12. | <b>[RhCp*Cl<sub>2</sub>]<sub>2</sub><br/>(4 mol%)</b>                | <b>3.0</b> | <b>PivOH</b>                  | <b>HFIP</b>       | <b>90</b> | <b>6</b> | <b>82</b> | <b>7</b> | <b>ND</b> |
| 13. | -                                                                    | 3.0        | PivOH                         | HFIP              | 90        | 12 h     | ND        | ND       | ND        |
| 14. | [Ru( <i>p</i> -<br>cymene)Cl <sub>2</sub> ] <sub>2</sub><br>(4 mol%) | 1.1        | PivOH                         | HFIP              | rt-90     | 24       | ND        | ND       | ND        |
| 15. | Pd(OAc) <sub>2</sub> (4<br>mol%)                                     | 1.1        | PivOH                         | HFIP              | rt-90     | 24       | ND        | ND       | ND        |
| 16. | CuI (4<br>mol%)                                                      | 1.1        | PivOH                         | HFIP              | rt-90     | 24       | ND        | ND       | ND        |
| 17. | SnCl <sub>2</sub> (4<br>mol%)                                        | 1.1        | PivOH                         | HFIP              | rt-90     | 24       | ND        | ND       | ND        |
| 18. | FeSO <sub>4</sub> (4<br>mol%)                                        | 1.1        | PivOH                         | HFIP              | rt-90     | 24       | ND        | ND       | ND        |
| 19. | Mn(OAc) <sub>2</sub> (4<br>mol%)                                     | 1.1        | PivOH                         | HFIP              | rt-90     | 24       | ND        | ND       | ND        |
| 20. | [RhCp*Cl <sub>2</sub> ] <sub>2</sub><br>(4 mol%) <sup>a</sup>        | 1.1        | AcOH                          | DCE               | rt-90     | 22       | 6         | 22       | ND        |
| 21. | [RhCp*Cl <sub>2</sub> ] <sub>2</sub><br>(4 mol%) <sup>b</sup>        | 1.1        | AcOH                          | HFIP              | rt-90     | 22       | 33        | 14       | ND        |
| 22. | [RhCp*Cl <sub>2</sub> ] <sub>2</sub><br>(4 mol%) <sup>c</sup>        | 1.1        | PivOH<br>Zn(OTf) <sub>2</sub> | DCE               | rt-90     | 22       | ND        | ND       | ND        |
| 23. | [RhCp*Cl <sub>2</sub> ] <sub>2</sub><br>(4 mol%)                     | 4.0        | PivOH                         | HFIP              | 90        | 6        | 68        | ND       | 5         |
| 24. | [RhCp*Cl <sub>2</sub> ] <sub>2</sub><br>(2.5 mol%)                   | 3.0        | PivOH                         | HFIP              | 90        | 6        | 21        | ND       | 10        |
| 25. | [RhCp*Cl <sub>2</sub> ] <sub>2</sub><br>(10 mol%)                    | 3.0        | PivOH                         | HFIP              | 90        | 6        | 65        | ND       | 18        |
| 26. | [RhCp*Cl <sub>2</sub> ] <sub>2</sub><br>(4 mol%)                     | 3.0        | PivOH                         | HFIP              | rt-90     | 12       | 68        | 25       | ND        |

Reaction conditions: Optimized reaction Condition **1a** (1 equiv.), **2a** (3 equiv.), [RhCp\*Cl<sub>2</sub>]<sub>2</sub> (4 mol%), AgSbF<sub>6</sub> (20 mol%), PivOH (20 mol%), HFIP (1.5 mL) at 90 °C for 6 h.

<sup>a,b</sup>AcOH shows better result than PivOH in DCE but poor result in HFIP. So PivOH was chosen to be optimum acid.

<sup>c</sup>No reaction was observed using Zn(OTf)<sub>2</sub> instead of AgSbF<sub>6</sub>.

ND = Not Detected.

## (B) Influence of different substituents on the alkyne part of cyclic hypervalent iodine reagent (Table S2):

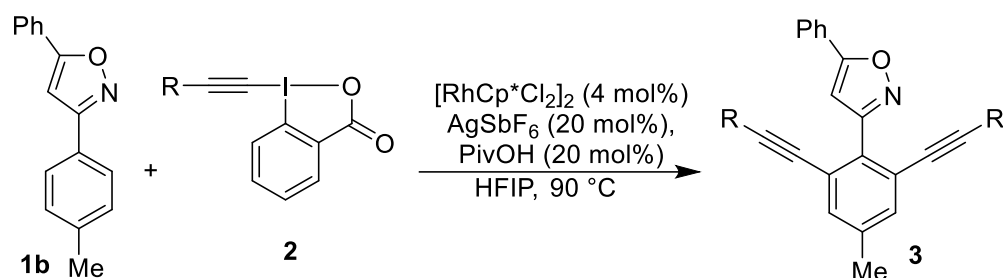

| entry | Hypervalent iodine reagents                                                             | Yield             |
|-------|-----------------------------------------------------------------------------------------|-------------------|
| 1.    | R = TIPS ( <b>2</b> )                                                                   | 97% ( <b>3b</b> ) |
| 2.    | R = TMS ( <b>2A</b> ) <sup>a, b, c</sup>                                                | ND ( <b>3A</b> )  |
| 3.    | R = TES ( <b>2B</b> ) <sup>c, d</sup>                                                   | ND ( <b>3B</b> )  |
| 4.    | R = Me ( <b>2C</b> ) <sup>c</sup>                                                       | ND ( <b>3C</b> )  |
| 5.    | R = <i>t</i> Bu ( <b>2D</b> ) <sup>c</sup>                                              | ND ( <b>3D</b> )  |
| 6.    | R = Ph ( <b>2E</b> ) <sup>c</sup>                                                       | ND ( <b>3E</b> )  |
| 7.    | R = <i>p</i> -NO <sub>2</sub> -C <sub>6</sub> H <sub>4</sub> ( <b>2F</b> ) <sup>c</sup> | ND ( <b>3F</b> )  |
| 8.    | R = <i>m</i> -NO <sub>2</sub> -C <sub>6</sub> H <sub>4</sub> ( <b>2G</b> ) <sup>c</sup> | ND ( <b>3G</b> )  |

ND = Not Detected; <sup>a</sup>DCE solvent used instead of HFIP; <sup>b</sup>Reaction carried out without AgSbF<sub>6</sub>. <sup>c</sup>Hypervalent iodine reagents are found to be decomposed within 1 h even at room temperature under the optimized condition. <sup>d</sup>Reaction was carried out without 1b, the reagent 2B degrade within 30 min in the standard condition.

## 5. General Procedure for the synthesis of alkylnated derivatives (GP-A):

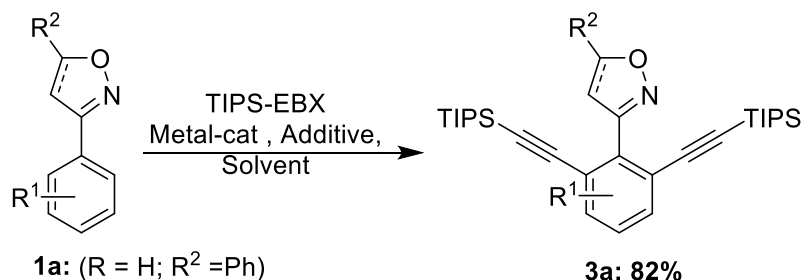

To a clean oven-dried 15 mL sealed tube equipped with a magnetic stir bar were sequentially added Aryl isoxazole derivatives **1a** (0.1 mmol, 1.0 equiv, 50 mg), [RhCp\*Cl<sub>2</sub>]<sub>2</sub> (4 mol %, 2.5 mg), PivOH (20 mol %), AgSbF<sub>6</sub> (20 mol%). Then HFIP (1.5 mL) was added, followed by the addition of TIPS-EBX (3.0 equiv.) into the reaction mixture. The tube was tightly closed and placed in an oil bath at 90 °C and was stirred for 6 h according to the conversion estimated by TLC. After completion (monitoring by TLC), the reaction mixture was cooled to room temperature and quenched with saturated solution of NaHCO<sub>3</sub> and was diluted with EtOAc (3 x 20 mL). The combined organic extracts were dried over Na<sub>2</sub>SO<sub>4</sub> and filtered. Concentration of the solution by rotary evaporation under reduced pressure gave a residue, which was purified by column chromatography using silica gel (100-200 mesh) using ethyl acetate/hexanes (9.8: 0.2) as eluent to afford the product **3a** in 82% yields. The di-alkynylated product was observed in 82% along with 7.0% mono-alkynylated product, and 24% (12 mg) of starting material was recovered.

## 6. Characterization of Products:

### 3-(2,6-bis((triisopropylsilyl)ethynyl)phenyl)-5-phenylisoxazole (3a)

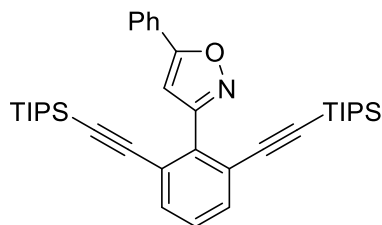

Following GP-A, **3a** was isolated in 82% yield (108 mg, 0.185 mmol) from **1a** (50 mg, 0.226 mmol) and **2** (291 mg, 0.679 mmol); yellow solid; m.p. 50-52 °C;  $R_f$  (9.5:0.5 Hexane /Ethyl acetate) = 0.7;

IR (ATR): 2941, 2891, 2864, 2150, 1456, 1232, 1072  $\text{cm}^{-1}$ .

$^1\text{H}$  NMR (400 MHz,  $\text{CDCl}_3$ )  $\delta$  7.89 – 7.76 (m, 2H), 7.55 (d,  $J$  = 8 Hz, 2H), 7.49 – 7.41 (m, 3H), 7.34 (t,  $J$  = 8 Hz, 1H), 6.66 (s, 1H), 0.95 (s, 42H).

$^{13}\text{C}$  NMR (75 MHz,  $\text{CDCl}_3$ )  $\delta$  169.1, 161.4, 135.0, 132.4, 129.7, 128.7, 127.7, 125.6, 124.3, 103.9, 101.6, 95.8, 18.3, 11.1.

HRMS (ESI-TOF):  $m/z$  calculated for  $\text{C}_{37}\text{H}_{51}\text{NOSi}_2$  [ $\text{M} + \text{H}$ ] $^+$  582.3587 found 582.3583.

### 5-phenyl-3-(2-((triisopropylsilyl)ethynyl)phenyl)isoxazole (4a): Following GP-A, **4a** was

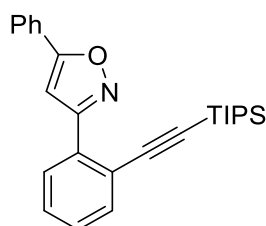

isolated in 7% yield (6 mg, 0.015 mmol); from **1a** (50 mg, 0.226 mmol) and **2** (291 mg, 0.679 mmol); yellow liquid;  $R_f$  (9.5:0.5 Hexane /Ethyl acetate) = 0.7;

IR(ATR): 2942, 2891, 2864, 2153, 1563, 1459, 1397, 1219, 1017  $\text{cm}^{-1}$ .

$^1\text{H}$  NMR (400 MHz,  $\text{CDCl}_3$ )  $\delta$  7.88 (dd,  $J$  = 7.6, 2.4 Hz, 1H), 7.82 (dd,  $J$  = 8.0, 2.0 Hz, 2H), 7.66 – 7.64 (m, 1H), 7.50 – 7.40 (m, 5H), 7.30 (s, 1H), 1.08 (d,  $J$  = 3.6 Hz, 21H).

$^{13}\text{C}$  NMR (75 MHz,  $\text{CDCl}_3$ )  $\delta$  169.3, 162.6, 134.4, 130.9, 130.0, 129.3, 128.8, 128.7, 128.7, 127.6, 125.7, 122.2, 105.4, 100.6, 96.5, 18.6, 11.2.

HRMS (ESI-TOF):  $m/z$  calculated for  $\text{C}_{26}\text{H}_{31}\text{NOSi}$  [ $\text{M} + \text{H}$ ] $^+$  402.2253 found 402.2231.

### 3-(4-methyl-2,6-bis((triisopropylsilyl)ethynyl)phenyl)-5-phenylisoxazole (3b)

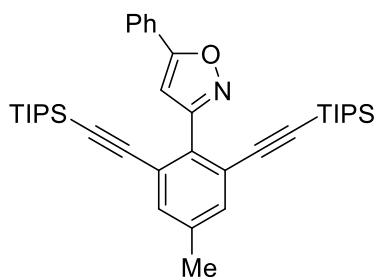

Following GP-A, **3b** was isolated in 97% yield (123 mg, 0.206 mmol) from **1b** (50 mg, 0.213 mmol) and **2** (273 mg, 0.638 mmol); yellow solid; m.p. 53-55 °C;  $R_f$  (9.5:0.5 Hexane /Ethyl acetate) = 0.8;

In gram scale, 2.33 gm of **3b** obtained from 1 gm starting material.

IR(ATR): 2942, 2864, 2156, 1593, 1462, 1382, 1259, 1027  $\text{cm}^{-1}$ .

$^1\text{H}$  NMR (300 MHz,  $\text{CDCl}_3$ )  $\delta$  7.78 – 7.75 (m, 2H), 7.49 – 7.42 (m, 3H), 7.37 (d,  $J$  = 0.9 Hz, 2H), 6.64 (s, 1H), 2.36 (s, 3H), 0.95 (s, 42H).

$^{13}\text{C}$  NMR (101 MHz,  $\text{CDCl}_3$ )  $\delta$  169.1, 161.4, 138.9, 133.1, 132.3, 129.7, 128.7, 127.8, 125.6, 124.2, 104.3, 101.7, 95.2, 20.8, 18.4, 11.1.

HRMS (ESI-TOF):  $m/z$  calculated for  $\text{C}_{38}\text{H}_{53}\text{NOSi}_2$  [ $\text{M} + \text{H}$ ] $^+$  596.3744 found 596.3746.

### **3-(4-methoxy-2,6-bis((triisopropylsilyl)ethynyl)phenyl)-5-phenylisoxazole (3c)**

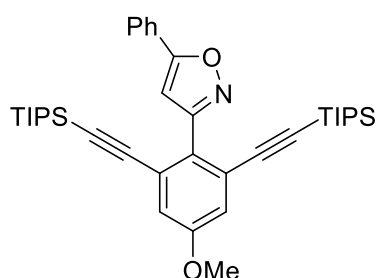

Following GP-A, **3c** was isolated in 95% yield (116 mg, 0.189 mmol); from **1c** (50 mg, 0.199 mmol) and **2** (256 mg, 0.598 mmol); yellow solid; m.p. 65-67 °C;  $R_f$  (9.5:0.5 Hexane /Ethyl acetate) = 0.8;

IR(ATR): 2941, 2891, 2864, 2149, 1588, 1461, 1381, 1326, 1155, 1005  $\text{cm}^{-1}$ .

$^1\text{H}$  NMR (300 MHz,  $\text{CDCl}_3$ )  $\delta$  7.78 – 7.74 (m, 2H), 7.49 – 7.42 (m, 3H), 7.07 (s, 2H), 6.63 (s, 1H), 3.86 (s, 3H), 0.95 (s, 42H).

$^{13}\text{C}$  NMR (101 MHz,  $\text{CDCl}_3$ )  $\delta$  169.0, 161.3, 159.4, 129.7, 128.7, 127.8, 127.7, 125.6, 125.3, 118.2, 104.0, 101.9, 95.5, 55.6, 18.4, 11.1.

HRMS (ESI-TOF):  $m/z$  calculated for  $\text{C}_{38}\text{H}_{53}\text{NO}_2\text{Si}_2$  [ $\text{M} + \text{H}$ ] $^+$  612.3693 found 612.3686.

### **4-(5-phenylisoxazol-3-yl)-3,5-bis((triisopropylsilyl)ethynyl)phenol (3d)**

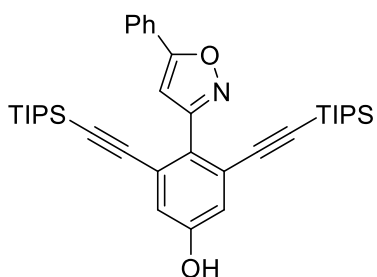

Following GP-A, **3d** was isolated in 47% yield (59 mg, 0.099 mmol); from **1d** (50 mg, 0.211 mmol) and **2** (271 mg, 0.633 mmol); yellow liquid;  $R_f$  (9.0:1.0 Hexane /Ethyl acetate) = 0.7;

IR(ATR): 3194, 2943, 2865, 2146, 1743, 1593, 1463, 1388, 1159, 1005  $\text{cm}^{-1}$ .

$^1\text{H}$  NMR (300 MHz,  $\text{CDCl}_3$ )  $\delta$  7.78 – 7.75 (m, 2H), 7.50 – 7.42 (m, 3H), 7.02 (s, 2H), 6.64 (s, 1H), 0.95 (s, 42H).

$^{13}\text{C}$  NMR (101 MHz,  $\text{CDCl}_3$ )  $\delta$  169.1, 161.3, 155.8, 129.8, 128.80, 127.73, 127.46, 125.64, 125.44, 119.88, 103.79, 101.9, 95.6, 18.3, 11.1.

HRMS (ESI-TOF):  $m/z$  calculated for  $\text{C}_{38}\text{H}_{53}\text{NOSi}_2$  [ $\text{M} + \text{H}$ ] $^+$  598.3537 found 598.3528.

### **3-(4,6-bis((triisopropylsilyl)ethynyl)benzo[d][1,3]dioxol-5-yl)-5-phenylisoxazole (3e)**



Following GP-A, **3e** was isolated in 91% yield (103 mg, 0.165 mmol); from **1e** (50 mg, 0.181 mmol) and **2** (232 mg, 0.542 mmol); yellow solid; m.p. 72-74 °C;  $R_f$  (9.5:0.5 Hexane /Ethyl acetate) = 0.8;

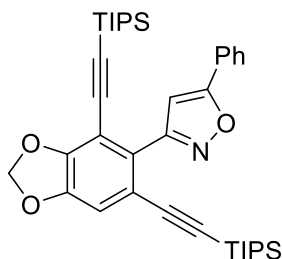

IR (ATR): 2942, 2891, 2864, 2156, 1574, 1460, 1420, 1230, 1071, 1028  $\text{cm}^{-1}$ .

$^1\text{H}$  NMR (300 MHz,  $\text{CDCl}_3$ )  $\delta$  7.77-7.74 (m, 2H), 7.49–7.42 (m, 3H), 6.96 (s, 1H), 6.63 (s, 1H), 6.11 (s, 2H), 0.95 (d,  $J$  = 3.9 Hz, 42H).

$^{13}\text{C}$  NMR (101 MHz,  $\text{CDCl}_3$ )  $\delta$  169.1, 161.0, 149.7, 147.9, 129.7, 129.3, 128.7, 127.7, 125.6, 117.8, 111.9, 106.1, 104.1, 102.3, 101.8, 100.3, 97.5, 93.8, 18.4, 18.3, 11.1, 11.0.

HRMS (ESI-TOF):  $m/z$  calculated for  $\text{C}_{38}\text{H}_{51}\text{NO}_3\text{Si}_2$  [ $\text{M} + \text{H}$ ] $^+$  626.3486 found 626.3472.

### **3-(4-fluoro-2,6-bis((triisopropylsilyl)ethynyl)phenyl)-5-phenylisoxazole (3f)**

Following GP-A, **3f** was isolated in 71% yield (89 mg, 0.148 mmol); from **1f** (50 mg, 0.209 mmol) and **2** (269 mg, 0.628 mmol); orange solid; m.p. 55-57 °C;  $R_f$  (9.5:0.5 Hexane /Ethyl acetate) = 0.8;

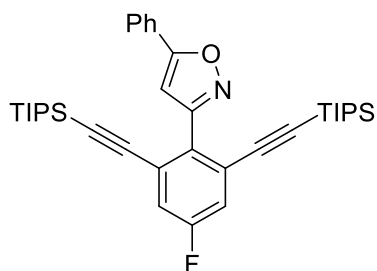

IR(ATR): 2942, 2891, 2864, 2164, 1589, 1578, 1461, 1381, 1135, 1005  $\text{cm}^{-1}$ .

$^1\text{H}$  NMR (300 MHz,  $\text{CDCl}_3$ )  $\delta$  7.81-7.77 (m, 2H), 7.53 – 7.46 (m, 3H), 7.29 (s, 2H), 6.66 (s, 1H), 0.97 (d,  $J$  = 1.8 Hz, 42H).

$^{13}\text{C}$  NMR (75 MHz,  $\text{CDCl}_3$ )  $\delta$  169.3, 160.8, 129.9, 128.8, 127.5, 126.2, 126.1, 125.6, 119.6, 119.3, 102.8, 102.8, 101.6, 97.3, 18.3, 11.0.

HRMS (ESI-TOF):  $m/z$  calculated for  $\text{C}_{37}\text{H}_{50}\text{FNOSi}_2$  [ $\text{M} + \text{H}$ ] $^+$  600.3493 found 600.3488.

### **3-(4-chloro-2,6-bis((triisopropylsilyl)ethynyl)phenyl)-5-phenylisoxazole (3g)**

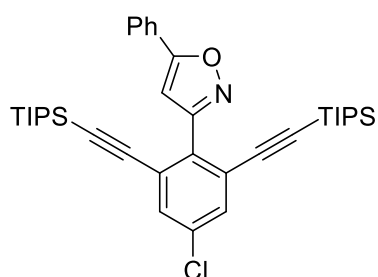

Following GP-A, **3g** was isolated in 74% yield (89 mg, 0.145 mmol); from **1g** (50 mg, 0.196 mmol) and **2** (252 mg, 0.588 mmol); yellow solid; m.p. 50-52 °C;  $R_f$  (9.5:0.5 Hexane /Ethyl acetate) = 0.8;

IR(ATR): 2943, 2864, 2159, 1574, 1463, 1378, 1004  $\text{cm}^{-1}$ .

$^1\text{H}$  NMR (400 MHz,  $\text{CDCl}_3$ )  $\delta$  7.77 – 7.75 (m, 2H), 7.52 (s, 2H), 7.47 – 7.44 (m, 3H), 6.64 (s, 1H), 0.95 (d,  $J$  = 2.4 Hz, 42H).

$^{13}\text{C}$  NMR (75 MHz,  $\text{CDCl}_3$ )  $\delta$  169.4, 160.7, 134.7, 133.4, 132.1, 129.9, 128.8, 127.5, 125.8, 125.6, 102.6, 101.4, 97.6, 18.3, 11.0.

HRMS (ESI-TOF):  $m/z$  calculated for  $\text{C}_{37}\text{H}_{50}\text{ClNOSi}_2$  [ $\text{M} + \text{H}$ ] $^+$  616.3198 found 616.3191.

### **3-(4-bromo-2,6-bis((triisopropylsilyl)ethynyl)phenyl)-5-phenylisoxazole (3h)**

For compound **3h** we observe decomposition of product or fastest formation of self-cyclized product of TIPS-EBX with increase of temperature. In case of these substrate, we performed the reactions at room temperature which were more time consuming (almost 36 hours)

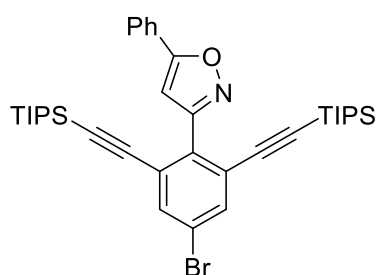

**3h** was isolated in 68% yield (75 mg, 0.113 mmol); from **1h** (50 mg, 0.167 mmol) and **2** (215 mg, 0.502 mmol); yellow solid;

m.p. 55-57 °C;  $R_f$  (9.5:0.5 Hexane /Ethyl acetate) = 0.8;

IR(ATR): 2943, 2890, 2864, 2157, 1573, 1557, 1462, 1379, 995  $\text{cm}^{-1}$ .

$^1\text{H}$  NMR (300 MHz,  $\text{CDCl}_3$ )  $\delta$  7.78 – 7.74 (m, 2H), 7.67 (s, 2H), 7.49 – 7.43 (m, 3H), 6.64 (s, 1H), 0.95 (d,  $J$  = 1.8 Hz, 42H).

$^{13}\text{C}$  NMR (75 MHz,  $\text{CDCl}_3$ )  $\delta$  169.4, 160.7, 134.9, 133.9, 129.9, 128.8, 127.5, 125.9, 125.6, 122.4, 102.5, 101.4, 97.7, 18.3, 11.0.

HRMS (ESI-TOF):  $m/z$  calculated for  $\text{C}_{37}\text{H}_{50}\text{BrNOSi}_2$   $[\text{M}+\text{H}]^+$  660.2693 found 660.2695.

### **3-(4-iodo-2,6-bis((triisopropylsilyl)ethynyl)phenyl)-5-phenylisoxazole (3i)**

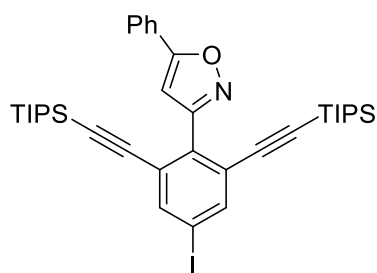

Following GP-A, **3i** was isolated in 81% yield (83 mg, 0.117 mmol); from **1i** (50 mg, 0.145 mmol) and **2** (186 mg, 0.434 mmol); yellow solid; m.p. 55-57 °C;  $R_f$  (9.5:0.5 Hexane /Ethyl acetate) = 0.8;

IR(ATR): 2943, 2864, 2153, 1574, 1552, 1461, 1379, 1219, 998  $\text{cm}^{-1}$ .

$^1\text{H}$  NMR (300 MHz,  $\text{CDCl}_3$ )  $\delta$  7.87 (s, 2H), 7.77-7.74 (m, 2H), 7.50 – 7.41 (m, 3H), 6.63 (s, 1H), 0.95 (s, 42H).

$^{13}\text{C}$  NMR (101 MHz,  $\text{CDCl}_3$ )  $\delta$  169.4, 160.8, 140.7, 134.5, 129.9, 128.8, 127.5, 125.8, 125.6, 102.3, 101.3, 97.7, 93.7, 18.3, 11.1.

HRMS (ESI-TOF):  $m/z$  calculated for  $\text{C}_{37}\text{H}_{50}\text{INOSi}_2$   $[\text{M}+\text{H}]^+$  708.2554 found 708.2525.

### **3-(4-nitro-2,6-bis((triisopropylsilyl)ethynyl)phenyl)-5-phenylisoxazole (3j)**

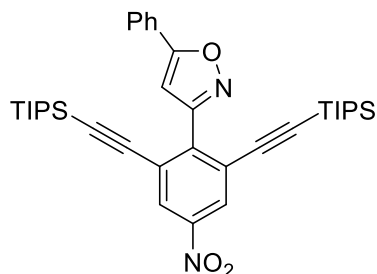

Following GP-A, **3j** was isolated in 71% yield (50 mg, 0.080 mmol

); from **1j** (30 mg, 0.113 mmol) and **2** (145 mg, 0.338 mmol); yellow solid; m.p. 78-80 °C;  $R_f$  (9.5:0.5 Hexane /Ethyl acetate) = 0.8;

IR(ATR): 2943, 2924, 2866, 2162, 1530, 1462, 1348, 1003  $\text{cm}^{-1}$ .

1.

$^1\text{H}$  NMR (300 MHz,  $\text{CDCl}_3$ )  $\delta$  8.32 (s, 2H), 7.79 – 7.76 (m, 2H), 7.52-7.47 (m, 3H), 6.68 (s, 1H), 0.96 (d,  $J$  = 2.7 Hz, 42H).

$^{13}\text{C}$  NMR (75 MHz,  $\text{CDCl}_3$ )  $\delta$  170.0, 160.2, 147.8, 140.6, 130.2, 128.9, 127.2, 126.4, 126.1, 125.6, 101.7, 101.0, 99.7, 18.3, 11.0.

HRMS (ESI-TOF):  $m/z$  calculated for  $\text{C}_{37}\text{H}_{50}\text{N}_2\text{O}_3\text{Si}_2$   $[\text{M} + \text{Na}]^+$  649.3258 found 649.3257.

### **3-(5-nitro-2-((triisopropylsilyl)ethynyl)phenyl)-5-phenylisoxazole (4k)**

### **3-(3-nitro-2,6-bis((triisopropylsilyl)ethynyl)phenyl)-5-phenylisoxazole (3k)**

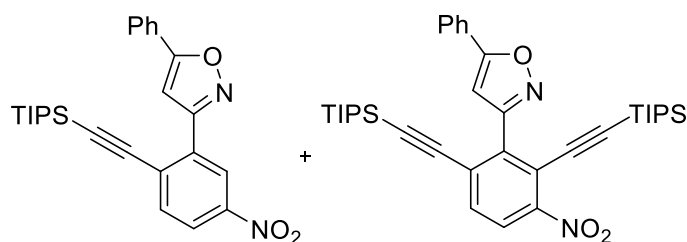

Following GP-A, a mixture of **4k** and **3k** was isolated in 62 mg (**4k:3k** = 3:1; NMR ratio); from **1k** (50 mg, 0.221 mmol) and **2** (284 mg, 0.664 mmol); off-white solid; m.p. 80-82 °C;  $R_f$  (9.5:0.5 Hexane /Ethyl acetate) = 0.8;

NMR yield: **4k** is 43% (43 mg, 0.096 mmol) and **3k** is 13% (19 mg (0.03 mmol). IR(ATR): 3108, 2963, 2925, 2864, 2158, 1731, 1522, 1459, 1348, 1068  $\text{cm}^{-1}$ .

**For 4k:**  $^1\text{H}$  NMR (300 MHz,  $\text{CDCl}_3$ )  $\delta$  8.75 (d,  $J$  = 2.4 Hz, 1H), 8.25 (dd,  $J$  = 8.4, 2.1 Hz, 1H), 7.84 – 7.77 (m, 3H), 7.54 – 7.46 (m, 3H), 7.27 (s, 1H), 1.31 – 1.01 (m, 21H).

**For 3k:**  $^1\text{H}$  NMR (300 MHz,  $\text{CDCl}_3$ )  $\delta$  8.17 (dd,  $J$  = 7.8, 1.2 Hz, 1H), 7.84 – 7.77 (m, 1H), 7.54 – 7.46 (m, 1H), 7.35 (dd,  $J$  = 7.8, 1.5 Hz, 1H), 7.27-7.22 (m, 3H) 6.65 (s, 1H), 1.31 – 1.01 (m, 12 H).

$^{13}\text{C}$  NMR (75 MHz,  $\text{CDCl}_3$ )  $\delta$  170.3, 160.9, 147.1, 142.8, 135.2, 134.3, 132.4, 130.4, 129.0, 128.4, 127.1, 125.9, 125.7, 124.1, 123.7, 116.9, 103.5, 100.1, 18.5, 18.4, 11.2, 10.4.

HRMS (ESI-TOF):  $m/z$  calculated for  $\text{C}_{26}\text{H}_{30}\text{N}_2\text{O}_3\text{Si}$  (**4k**)  $[\text{M} + \text{H}]^+$  447.2104 found 447.2061

$m/z$  calculated for  $\text{C}_{37}\text{H}_{50}\text{N}_2\text{O}_3\text{Si}_2$  (**3k**)  $[\text{M} + \text{H}]^+$  627.3438 found 627.3375.

### **5-phenyl-3-(3-((triisopropylsilyl)ethynyl)naphthalen-2-yl)isoxazole (4l)**

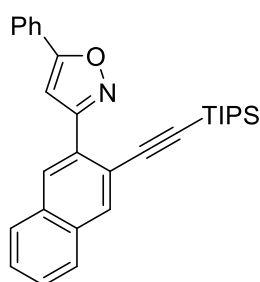

Following GP-A, **4l** was isolated in 88% yield (77 mg, 0.171 mmol); from **1l** (50 mg, 0.194 mmol) and **2** (249 mg, 0.581 mmol); yellow solid; m.p. 52-54 °C;  $R_f$  (9.5:0.5 Hexane /Ethyl acetate) = 0.8;

IR(ATR): 3055, 2941, 2890, 2841, 2146, 1572, 1507, 1448, 1169, 1064  $\text{cm}^{-1}$ .

$^1\text{H}$  NMR (300 MHz,  $\text{CDCl}_3$ )  $\delta$  8.33 (s, 1H), 8.17 (s, 1H), 7.91 – 7.82 (m, 4H), 7.58 – 7.42 (m, 5H), 7.28 (s, 1H), 1.10 (d,  $J$  = 3.0 Hz, 21H).

$^{13}\text{C}$  NMR (75 MHz,  $\text{CDCl}_3$ )  $\delta$  169.3, 162.8, 134.5, 133.5, 133.1, 132.5, 130.0, 128.8, 128.6, 128.4, 127.5, 127.5, 127.4, 127.3, 125.7, 119.4, 113.8, 105.6, 101.0, 95.9, 18.6, 11.3.

HRMS (ESI-TOF):  $m/z$  calculated for  $\text{C}_{30}\text{H}_{33}\text{NOSi}$   $[\text{M} + \text{H}]^+$  452.2410 found 452.2421.

### **3-(4,5-dimethoxy-2-((triisopropylsilyl)ethynyl)phenyl)-5-phenylisoxazole (4m)**

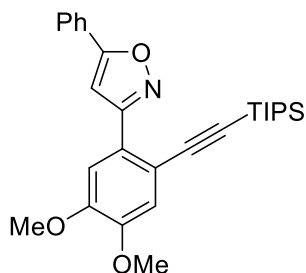

Following GP-A, **4m** was isolated in 71% yield (58 mg, 0.126 mmol); from **1m** (50 mg, 0.178 mmol) and **2** (229 mg, 0.534 mmol); yellow liquid;  $R_f$  (9.5:0.5 Hexane /Ethyl acetate) = 0.8;

IR(ATR): 2926, 2864, 2145, 1601, 1521, 1493, 1362, 1261, 1218, 1001  $\text{cm}^{-1}$ .

$^1\text{H}$  NMR (300 MHz,  $\text{CDCl}_3$ )  $\delta$  7.82-7.79 (m, 2H), 7.51 – 7.45 (m, 3H), 7.42 (s, 1H), 7.38 (s, 1H), 7.04 (s, 1H), 3.97 (s, 3H), 3.95 (s,

3H), 1.10 (d,  $J$  = 3.0 Hz, 21H).

$^{13}\text{C}$  NMR (101 MHz,  $\text{CDCl}_3$ )  $\delta$  169.3, 162.4, 149.6, 129.9, 128.8, 127.67, 125.71, 124.37, 122.32, 116.23, 114.74, 110.94, 105.72, 100.5, 94.9, 56.1, 56.0, 18.6, 11.3.

HRMS (ESI-TOF):  $m/z$  calculated for  $\text{C}_{28}\text{H}_{35}\text{NO}_3\text{Si}$  [ $\text{M} + \text{H}$ ] $^+$  462.2464 found 462.2463.

### **3-(2-methyl-6-((triisopropylsilyl)ethynyl)phenyl)-5-phenylisoxazole (4n)**

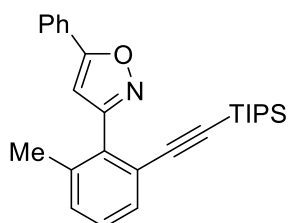

Following GP-A, **4n** was isolated in 91% yield (81 mg, 0.194 mmol); from **1n** (50 mg, 0.213 mmol) and **2** (273 mg, 0.638 mmol); yellow liquid;  $R_f$  (9.5:0.5 Hexane /Ethyl acetate) = 0.8;

IR(ATR): 2942, 2891, 2864, 2149, 1592, 1573, 1383, 1257, 1017  $\text{cm}^{-1}$ .

$^1\text{H}$  NMR (300 MHz,  $\text{CDCl}_3$ )  $\delta$  7.81 (dd,  $J$  = 8.1, 2.1 Hz, 2H), 7.51 – 7.44 (m, 4H), 7.32-7.21 (m, 2H), 6.66 (s, 1H), 2.31 (s, 3H), 0.94 (s, 21H).

$^{13}\text{C}$  NMR (101 MHz,  $\text{CDCl}_3$ )  $\delta$  169.3, 162.1, 137.7, 131.8, 130.4, 130.3, 129.9, 128.8, 128.8, 127.61, 125.7, 124.0, 105.0, 101.6, 95.1, 20.4, 18.4, 11.1.

HRMS (ESI-TOF):  $m/z$  calculated for  $\text{C}_{27}\text{H}_{33}\text{NOSi}$  [ $\text{M} + \text{H}$ ] $^+$  416.2410 found 416.2409.

### **3-(2-chloro-6-((triisopropylsilyl)ethynyl)phenyl)-5-phenylisoxazole (4o)**

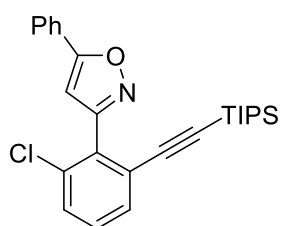

Following GP-A, **4o** was isolated in 68% yield (35 mg, 0.080 mmol); from **1o** (30 mg, 0.118 mmol) and **2** (151 mg, 0.353 mmol); yellow liquid;  $R_f$  (9.5:0.5 Hexane /Ethyl acetate) = 0.8;

IR(ATR): 2942, 2864, 2165, 1592, 1574, 1448, 1382, 1219, 1073  $\text{cm}^{-1}$ .

$^1\text{H}$  NMR (400 MHz,  $\text{CDCl}_3$ )  $\delta$  7.83-7.80 (m, 2H), 7.53 – 7.45 (m, 5H),

7.34 (t,  $J$  = 8.0 Hz, 1H), 6.66 (s, 1H), 0.95 (d,  $J$  = 2.4 Hz, 21H).

$^{13}\text{C}$  NMR (75 MHz,  $\text{CDCl}_3$ )  $\delta$  169.7, 160.4, 134.2, 131.5, 131.2, 130.1, 130.0, 129.6, 128.9, 127.4, 126.1, 125.7, 103.5, 101.3, 96.9, 18.4, 11.0.

HRMS (ESI-TOF):  $m/z$  calculated for  $\text{C}_{26}\text{H}_{30}\text{ClNOSi}$  [ $\text{M} + \text{H}$ ] $^+$  436.1863 found 436.1851.

### **3-(6-bromo-3-fluoro-2-((triisopropylsilyl)ethynyl)phenyl)-5-phenylisoxazole (4p)**

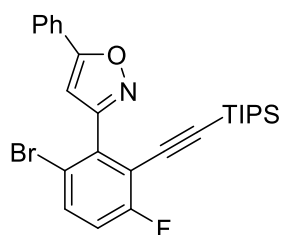

Following GP-A, **4p** was isolated in 92% yield (43 mg, 0.086 mmol); from **1p** (30 mg, 0.094 mmol) and **2** (121 mg, 0.283 mmol); yellow solid; m.p. 75-77 °C;  $R_f$  (9.5:0.5 Hexane /Ethyl acetate) = 0.8;

IR(ATR): 2942, 2865, 2167, 1591, 1453, 1415, 1374, 1253, 1064  $\text{cm}^{-1}$ .

$^1\text{H}$  NMR (300 MHz,  $\text{CDCl}_3$ )  $\delta$  7.83-7.80 (m, 2H), 7.60 (dd,  $J$  = 9.0, 5.1

Hz, 1H), 7.52 – 7.45 (m, 3H), 7.08 (t,  $J$  = 8.4 Hz, 1H), 6.64 (s, 1H), 0.95 (s, 21H).

$^{13}\text{C}$  NMR (75 MHz,  $\text{CDCl}_3$ )  $\delta$  170.0, 164.1, 161.2, 161.1, 160.7, 135.0, 133.4, 133.3, 130.2, 128.9, 127.2, 125.7, 117.8, 117.7, 117.6, 117.5, 115.2, 115.0, 103.5, 103.5, 100.9, 96.3, 18.3, 10.9.

HRMS (ESI-TOF):  $m/z$  calculated for  $\text{C}_{26}\text{H}_{29}\text{BrFNOSi}$  [ $\text{M}^+ \text{H}$ ] $^+$  498.1264 found 498.1258.

### **5-phenyl-3-(3-((triisopropylsilyl)ethynyl)thiophen-2-yl)isoxazole (4s)**

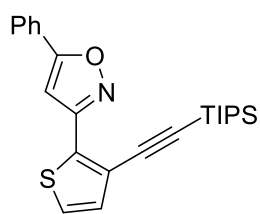

Following GP-A, **4s** was isolated in 53% yield (29 mg, 0.070 mmol); from **1s** (30 mg, 0.132 mmol) and **2** (170 mg, 0.396 mmol); yellow gummy;

$R_f$  (9.5:0.5 Hexane /Ethyl acetate) = 0.8;

IR(ATR): 2924, 2854, 2148, 1574, 1492, 1424, 1192, 1220, 1192, 981  $\text{cm}^{-1}$ .

$^1\text{H}$  NMR (400 MHz,  $\text{CDCl}_3$ )  $\delta$  7.81 – 7.79 (m, 2H), 7.53 (s, 1H), 7.51 – 7.45 (m, 3H), 7.31 (d,  $J$  = 5.2 Hz, 1H), 7.17 (d,  $J$  = 5.2 Hz, 1H), 1.17 (d,  $J$  = 4.0 Hz, 21H).

$^{13}\text{C}$  NMR (101 MHz,  $\text{CDCl}_3$ )  $\delta$  170.2, 157.8, 132.6, 131.9, 130.3, 128.9, 127.4, 126.2, 125.8, 122.3, 101.2, 98.0, 96.7, 18.7, 11.4.

HRMS (ESI-TOF):  $m/z$  calculated for  $\text{C}_{24}\text{H}_{29}\text{NOSSi}$  [ $\text{M}^+ \text{H}$ ] $^+$  408.1817 found 408.1784.

### **3-(1-methyl-2-((triisopropylsilyl)ethynyl)-1H-indol-3-yl)-5-phenylisoxazole (4t)**

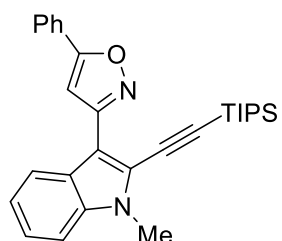

Following GP-A, **4t** was isolated in 56% yield (28 mg, 0.061 mmol); from **1t** (30 mg, 0.109 mmol) and **2** (141 mg, 0.328 mmol); yellow solid; m.p. 80-82 °C;  $R_f$  (9.5:0.5 Hexane /Ethyl acetate) = 0.8;

IR(ATR): 2942, 2864, 2145, 1683, 1577, 1461, 1340, 1283, 1151, 1034  $\text{cm}^{-1}$ .

$^1\text{H}$  NMR (300 MHz,  $\text{CDCl}_3$ )  $\delta$  7.82 – 7.78 (m, 2H), 7.49 – 7.42 (m, 5H), 7.38 (dd,  $J$  = 8.1, 1.2 Hz, 1H), 7.24 – 7.21 (m, 1H), 6.94 (s, 1H), 3.86 (s, 3H), 0.91 (d,  $J$  = 3.9 Hz, 21H).

$^{13}\text{C}$  NMR (75 MHz,  $\text{CDCl}_3$ )  $\delta$  168.2, 158.5, 137.5, 130.7, 129.7, 128.7, 128.1, 127.7, 125.8, 125.5, 121.9, 115.0, 110.4, 106.1, 104.8, 103.3, 95.5, 18.4, 11.2.

HRMS (ESI-TOF):  $m/z$  calculated for  $\text{C}_{29}\text{H}_{34}\text{N}_2\text{OSi}$  [ $\text{M}^+ \text{H}$ ] $^+$  455.2519 found 455.2497.

**Ethyl 3-(4-bromo-2,6-bis((triisopropylsilyl)ethynyl)phenyl)-4,5-dihydroisoxazole-5-carboxylate (3u)**

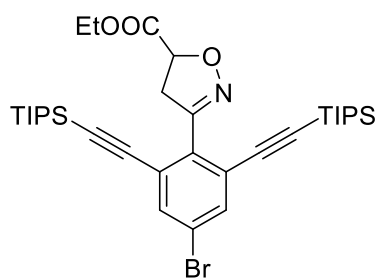

Following GP-A, **3u** was isolated in 44% yield (29 mg, 0.044 mmol); from **1u** (30 mg, 0.101 mmol) and **2** (129 mg, 0.302 mmol); yellow liquid;  $R_f$  (9.5:0.5 Hexane /Ethyl acetate) = 0.8; IR(ATR): 2924, 2865, 2154, 1740, 1557, 1463, 1219, 997  $\text{cm}^{-1}$ .

$^1\text{H}$  NMR (300 MHz,  $\text{CDCl}_3$ )  $\delta$  7.62 (s, 2H), 5.08 (t,  $J$  = 11.1 Hz, 1H), 4.32 – 4.21 (m, 2H), 3.67 (d,  $J$  = 11.1 Hz, 2H), 1.34 (t,  $J$  = 2.7 Hz, 3H), 1.10 (d,  $J$  = 2.1 Hz, 42H).

$^{13}\text{C}$  NMR (101 MHz,  $\text{CDCl}_3$ )  $\delta$  169.1, 154.4, 135.6, 132.4, 125.2, 122.5, 102.2, 98.2, 78.8, 61.8, 40.8, 18.5, 18.2, 11.1.

HRMS (ESI-TOF):  $m/z$  calculated for  $\text{C}_{34}\text{H}_{52}\text{BrNO}_3\text{Si}_2$  [ $\text{M} + 2 + \text{H}$ ] $^+$  660.2727 found 660.2722.

**5-phenyl-3-(2-((triisopropylsilyl)ethynyl)phenyl)-4,5-dihydroisoxazole (4v)**

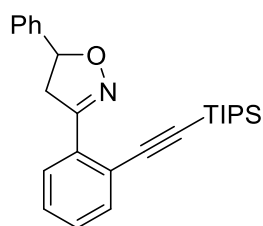

Following GP-A, **4v** was isolated in 53% yield (29 mg, 0.072 mmol); from **1v** (30 mg, 0.135 mmol) and **2** (173 mg, 0.404 mmol); yellow gummy;  $R_f$  (9.5:0.5 Hexane /Ethyl acetate) = 0.8;

IR(ATR): 2922, 2852, 2151, 1462, 1219, 995  $\text{cm}^{-1}$ .

$^1\text{H}$  NMR (300 MHz,  $\text{CDCl}_3$ )  $\delta$  7.85 – 7.82 (m, 1H), 7.57 – 7.52 (m, 1H), 7.41 – 7.29 (m, 7H), 5.73 (dd,  $J$  = 10.8, 9.0 Hz, 1H), 4.15-4.06 (m, 1H), 3.74 (dd,  $J$  = 17.4, 9.3 Hz, 1H), 1.07 (s, 21H).

$^{13}\text{C}$  NMR (101 MHz,  $\text{CDCl}_3$ )  $\delta$  157.1, 140.7, 134.9, 131.3, 129.3, 128.6, 128.6, 128.4, 128.0, 125.7, 121.9, 105.6, 97.5, 83.4, 45.1, 18.6, 11.3.

HRMS (ESI-TOF):  $m/z$  calculated for  $\text{C}_{26}\text{H}_{33}\text{NOSi}$  [ $\text{M} + \text{H}$ ] $^+$  404.2410 found 404.2404.

**3-(4-methoxy-2-((triisopropylsilyl)ethynyl)phenyl)-5-phenyl-4,5-dihydroisoxazole (4w)**

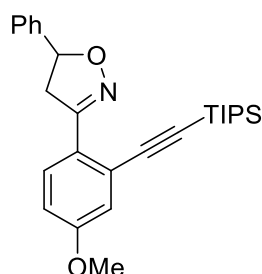

Following GP-A, **4w** was isolated in 55% yield (28 mg, 0.065 mmol); from **1w** (30 mg, 0.119 mmol) and **2** (152 mg, 0.356 mmol); yellow gummy;  $R_f$  (9.5:0.5 Hexane /Ethyl acetate) = 0.8;

IR(ATR): 2925, 2864, 2150, 1601, 1463, 1345, 1286, 1220, 1165, 1049  $\text{cm}^{-1}$ .

$^1\text{H}$  NMR (300 MHz,  $\text{CDCl}_3$ )  $\delta$  7.80 (d,  $J$  = 9.0 Hz, 1H), 7.40 – 7.30 (m, 5H), 7.01 (d,  $J$  = 2.7 Hz, 1H), 6.91 (dd,  $J$  = 9.0, 3.0 Hz, 1H), 5.70 (dd,  $J$  = 10.8, 9.0 Hz, 1H), 4.08 (dd,  $J$  = 17.1, 10.5 Hz, 1H), 3.83 (s, 3H), 3.71 (dd,  $J$  = 17.1, 9.0 Hz, 1H), 1.06 (d,  $J$  = 2.4 Hz, 21H).

$^{13}\text{C}$  NMR (101 MHz,  $\text{CDCl}_3$ )  $\delta$  160.1, 156.6, 140.9, 130.0, 128.6, 128.0, 125.7, 124.0, 123.1, 119.2, 115.3, 105.5, 97.3, 83.1, 55.4, 45.3, 18.6, 11.3.

HRMS (ESI-TOF):  $m/z$  calculated for  $\text{C}_{27}\text{H}_{35}\text{NO}_2\text{Si}$  [ $\text{M} + \text{H}$ ] $^+$  434.2515 found 434.2511.

### **5-(4-methoxyphenyl)-3-(2-methyl-6-((triisopropylsilyl)ethynyl)phenyl)isoxazole (4x)**

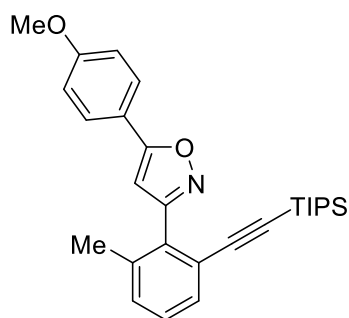

Following GP-A, **4x** was isolated in 94% yield (47 mg, 0.106 mmol); from **1x** (30 mg, 0.113 mmol) and **2** (145 mg, 0.339 mmol); yellow gummy;  $R_f$  (9.5:0.5 Hexane /Ethyl acetate) = 0.8; IR(ATR): 2941, 2864, 2149, 1615, 1514, 1460, 1383, 1304, 1253, 1175, 996  $\text{cm}^{-1}$ .

$^1\text{H}$  NMR (300 MHz,  $\text{CDCl}_3$ )  $\delta$  7.79 – 7.74 (m, 2H), 7.48 – 7.45 (m, 1H), 7.33-7.28 (m, 2H), 7.03 – 6.99 (m, 2H), 6.55 (s, 1H),

3.90 (s, 3H), 2.32 (s, 3H), 0.97 (s, 21H).

$^{13}\text{C}$  NMR (101 MHz,  $\text{CDCl}_3$ )  $\delta$  169.3, 162.1, 160.9, 137.7, 132.0, 130.4, 130.2, 128.7, 127.2, 124.0, 120.5, 114.2, 105.1, 100.2, 95.0, 55.3, 20.4, 18.4, 11.1.

HRMS (ESI-TOF):  $m/z$  calculated for  $\text{C}_{28}\text{H}_{35}\text{NO}_2\text{Si}$  [ $\text{M} + \text{H}$ ] $^+$  446.2515 found 446.2479.

### **3-(2-methyl-6-((triisopropylsilyl)ethynyl)phenyl)-5-(3-nitrophenyl)isoxazole (4y)**

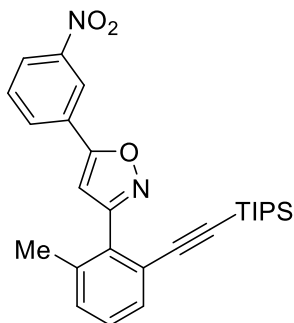

Following GP-A, **4y** was isolated in 81% yield (40 mg, 0.087 mmol); from **1y** (30 mg, 0.107 mmol) and **2** (138 mg, 0.321 mmol); yellow gummy;  $R_f$  (9.5:0.5 Hexane /Ethyl acetate) = 0.8;

IR(ATR): 2942, 2891, 2864, 2149, 1532, 1461, 1833, 1348, 1220, 1065  $\text{cm}^{-1}$ .

$^1\text{H}$  NMR (300 MHz,  $\text{CDCl}_3$ )  $\delta$  8.64 (t,  $J$  = 1.8 Hz, 1H), 8.33-8.29 (m, 1H), 8.17-8.13 (m, 1H), 7.70 (t,  $J$  = 8.1 Hz, 1H), 7.49 – 7.45 (m, 1H),

7.34 – 7.27 (m, 2H), 6.85 (s, 1H), 2.32 (s, 3H), 0.94 (d,  $J$  = 1.2 Hz, 21H).

$^{13}\text{C}$  NMR (75 MHz,  $\text{CDCl}_3$ )  $\delta$  166.6, 162.4, 148.6, 137.7, 131.1, 130.9, 130.6, 130.4, 130.2, 129.1, 129.0, 124.4, 123.9, 120.6, 104.9, 103.5, 95.4, 20.4, 18.4, 11.1.

HRMS (ESI-TOF):  $m/z$  calculated for  $\text{C}_{27}\text{H}_{32}\text{N}_2\text{O}_3\text{Si}$  [ $\text{M} + \text{H}$ ] $^+$  461.2260 found 461.2255.

### **(Z)-7-iodo-3-((triisopropylsilyl)methylene)isobenzofuran-1(3H)-one (5)**

Following the procedure enlisted in table1, entry 10, **5** was isolated in 67% yield (71 mg, 0.166 mmol); **2** (107 mg, 0.249 mmol); white solid; m.p. 80-82  $^\circ\text{C}$ ;  $R_f$  (9.5:0.5

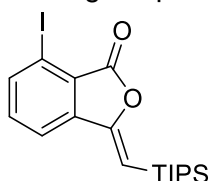

Hexane /Ethyl acetate) = 0.7;

IR(ATR): 2939, 2865, 1785, 1636, 1573, 1458, 1238, 1070  $\text{cm}^{-1}$ .

$^1\text{H}$  NMR (400 MHz,  $\text{CDCl}_3$ )  $\delta$  7.99 (d,  $J = 7.6$  Hz, 1H), 7.73 (d,  $J = 7.6$  Hz, 1H), 7.36 (t,  $J = 8.0$  Hz, 1H), 5.63 (s, 1H), 1.40-1.31 (m, 3H), 1.10 (d,  $J = 7.2$  Hz, 18H).

$^{13}\text{C}$  NMR (101 MHz,  $\text{CDCl}_3$ )  $\delta$  165.5, 154.3, 141.3, 141.0, 134.8, 126.1, 120.5, 101.4, 91.2, 18.7, 11.5.

HRMS (ESI-TOF):  $m/z$  calculated for  $\text{C}_{18}\text{H}_{25}\text{IO}_2\text{Si}$   $[\text{M} + \text{H}]^+$  429.0747 found 429.0717.

## 7. Product Modification:

**Procedure for the Synthesis of 3-(2,6-diethynyl-4-methoxyphenyl)-5-phenylisoxazole (6)** (via deprotection of TIPS Group). By following reported procedure,<sup>13,14</sup>

**3c** was dissolved in anhydrous THF (1 equivalent, 0.196 mmol), followed by the addition of 2 equivalents of tetrabutylammonium fluoride (TBAF) dropwise to the reaction mixture in an ice bath, the reaction was left to stir at room temperature for 30 minutes. On completion (monitoring by TLC), the reaction mixture was diluted with saturated  $\text{NH}_4\text{Cl}$  (aq.) and the organic phase was separated using  $\text{Et}_2\text{O}$ , dried over anhydrous  $\text{Na}_2\text{SO}_4$ , and filtered. Under lower pressure, the solvent was eliminated. The residue afforded a yellow solid **6** after purified by column chromatography on silica gel.

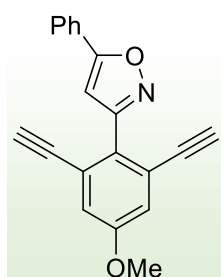

**6** was isolated in 94% yield (55 mg, 0.184 mmol); yellow solid; m.p. 98 °C;  $R_f$  (9.0:1.0 Hexane /Ethyl acetate) = 0.5;

IR(ATR): 3278, 3227, 2929, 1611, 1587, 1563, 1488, 1444, 1381, 1316, 1149, 1045  $\text{cm}^{-1}$ .

$^1\text{H}$  NMR (300 MHz,  $\text{CDCl}_3$ )  $\delta$  7.87 – 7.83 (m, 2H), 7.52 – 7.44 (m, 3H), 7.16 (s, 2H), 6.77 (s, 1H), 3.86 (s, 3H), 3.11 (s, 2H).

$^{13}\text{C}$  NMR (101 MHz,  $\text{CDCl}_3$ )  $\delta$  169.2, 160.7, 159.4, 130.0, 128.9, 127.6, 127.1, 125.8, 123.9, 119.5, 101.5, 81.5, 81.1, 55.6.

HRMS (ESI-TOF):  $m/z$  calculated for  $\text{C}_{20}\text{H}_{13}\text{NO}_2$   $[\text{M} + \text{H}]^+$  300.1025 found 300.1024

**Procedure for the Synthesis of 3-(2,6-bis(1-benzyl-1H-1,2,3-triazol-4-yl)-4-methoxyphenyl)-5-phenylisoxazole (7)**. By following reported procedure,<sup>15</sup>

The prepared terminal alkyne **6** (1 equivalent, 0.167 mmol) was dissolved in DMF (1 ml) in a clean oven-dried sealed tube and allowed to stirred at 60 °C after adding 10 mol%  $\text{CuI}$  and 2 equivalents  $\text{BnN}_3$ . On completion after 3 h (monitored by TLC), it was diluted with cold water (10 ml) and extracted with DCM. The combined organic part was dried over anhydrous  $\text{Na}_2\text{SO}_4$ , and filtered. Under lower pressure, the solvent was eliminated. The residue afforded



a brown solid **7** after purified by column chromatography on silica gel.

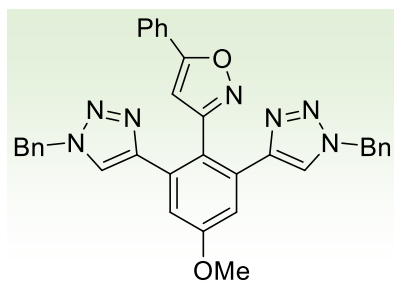

**7** was isolated in 47% yield (44 mg, 0.078 mmol); brown solid; m.p. 145 °C;  $R_f$  (9.5:0.5 MeOH /DCM) = 0.4;

IR(ATR): 3378, 2924, 2852, 1605, 1486, 1455, 1385, 1352, 1247, 1165, 1049  $\text{cm}^{-1}$ .

$^1\text{H}$  NMR (300 MHz,  $\text{CDCl}_3$ )  $\delta$  7.66 (s, 2H), 7.59 – 7.55 (m, 2H), 7.53 – 7.49 (m, 3H), 7.04-6.70 (m, 12H), 6.05 (s, 1H), 5.37 (s, 4H), 3.96 (s, 3H).

$^{13}\text{C}$  NMR (75 MHz,  $\text{CDCl}_3$ )  $\delta$  170.1, 162.9, 160.7, 145.5, 134.1, 132.6, 130.5, 128.9, 128.8, 128.5, 127.7, 126.7, 125.8, 122.5, 117.1, 114.1, 101.1, 55.7, 54.0.

HRMS (ESI-TOF):  $m/z$  calculated for  $\text{C}_{34}\text{H}_{27}\text{N}_7\text{O}_2$   $[\text{M} + \text{H}]^+$  566.2304 found 566.2311.

**Procedure for the Synthesis of 5-phenyl-3-(4-(phenylethynyl)-2,6-bis((triisopropylsilyl)ethynyl)phenyl)isoxazole (**8**).** (via Sonogashira Coupling) By following reported procedure, <sup>16</sup>

1 equivalent (0.042 mmol) **3i** was dissolved in anhydrous THF, followed by the sequential addition of 1.2 equivalents (0.051 mmol) phenyl acetylene, 0.1 ml  $\text{Et}_3\text{N}$ , 2 mol% of each  $\text{Pd}(\text{PPh}_3)_2\text{Cl}_2$  and  $\text{CuI}$ . After stirring the reaction at room temperature for 2 h, the reaction mixture was diluted with water and the organic phase was separated using DCM (10 ml x 3), dried over anhydrous  $\text{Na}_2\text{SO}_4$ , and filtered. Under lower pressure, the solvent was eliminated. The residue afforded a yellow solid **8** after purified by column chromatography on silica gel.

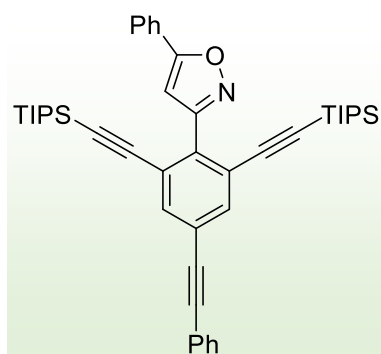

**8** was isolated in 80% yield (23 mg, 0.034 mmol); yellow solid; m.p. 60 °C;  $R_f$  (9.9:0.1 Hexane /Ethyl acetate) = 0.8;

IR(ATR): 2142, 2863, 2156, 2116, 1584, 1490, 1462, 1383, 1221, 1006  $\text{cm}^{-1}$ .

$^1\text{H}$  NMR (400 MHz,  $\text{CDCl}_3$ )  $\delta$  7.79 – 7.76 (m, 2H), 7.70 (s, 2H), 7.57 – 7.53 (m, 2H), 7.50 – 7.44 (m, 3H), 7.38 – 7.36 (m, 3H), 6.68 (s, 1H), 0.97 (s, 42H).

$^{13}\text{C}$  NMR (75 MHz,  $\text{CDCl}_3$ )  $\delta$  169.3, 161.0, 135.0, 134.3, 131.7, 129.8, 128.8, 128.7, 128.4, 127.6, 125.6, 124.7, 124.5, 122.5, 103.2, 101.5, 96.6, 91.3, 87.3, 18.3, 11.1.

HRMS (ESI-TOF):  $m/z$  calculated for  $\text{C}_{45}\text{H}_{55}\text{NOSi}_2$   $[\text{M} + \text{H}]^+$  682.3900 found 682.3896

**Procedure for the Synthesis of 3-(3,5-bis((triisopropylsilyl)ethynyl)-[1,1'-biphenyl]-4-yl)-**

**5-phenylisoxazole (9).** (via Suzuki Coupling) By following reported procedure, <sup>17</sup>

In a clean, over-dried sealed tube, **3i** (1 equivalent, 0.042 mmol), phenyl boronic acid (1.2 equivalents, 0.051 mmol), 2.5 equivalents  $K_2CO_3$ , 1 mol%  $Pd(PPh_3)_4$  was dissolved in a mixture of 1.5 ml THF:H<sub>2</sub>O (2:1). After completion (monitored by TLC), it was diluted with water and the organic phase was separated using DCM (10 ml x 3), dried over anhydrous  $Na_2SO_4$ , and filtered. Under lower pressure, the solvent was eliminated. The residue afforded a viscous off-white liquid **9** after purified by flash column chromatography on silica gel.

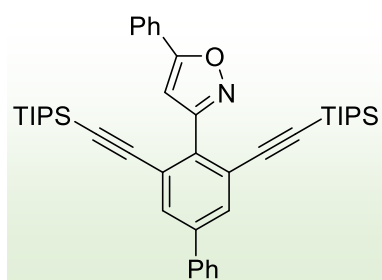

**9** was isolated in 97% yield (27 mg, 0.041 mmol); viscous off-white liquid;  $R_f$  (9.9:0.1 Hexane /Ethyl acetate) = 0.7;

IR(ATR): 2942, 2892, 2865, 2154, 1591, 1462, 1383, 1195, 1072, 1004  $cm^{-1}$ .

<sup>1</sup>H NMR (300 MHz,  $CDCl_3$ )  $\delta$  7.80 – 7.77 (m, 2H), 7.75 (s, 2H), 7.65 – 7.62 (m, 2H), 7.51 – 7.40 (m, 6H), 6.69 (s, 1H), 0.97 (d,

$J = 1.5$  Hz, 42H).

<sup>13</sup>C NMR (101 MHz,  $CDCl_3$ )  $\delta$  169.2, 161.3, 142.1, 139.1, 133.6, 131.1, 129.8, 128.9, 128.8, 128.1, 127.7, 127.1, 125.6, 124.8, 104.0, 101.6, 95.9, 18.4, 11.1.

HRMS (ESI-TOF):  $m/z$  calculated for  $C_{43}H_{55}NOSi_2$   $[M+ H]^+$  658.3900 found 658.3892.

## 8. Mechanistic Study:

### A. Procedure for H/D-Exchange experiment without TIPS-EBX in D<sub>2</sub>O:

To a clean oven-dried 15 mL sealed tube equipped with a magnetic stir bar were sequentially added isoxazole derivatives (0.2 mmol, 1.0 equiv),  $[RhCp^*Cl_2]_2$  (4 mol %, 5.25 mg),  $AgSbF_6$  (20 mol %), then DCE (1.5 mL) was added, followed by the addition of D<sub>2</sub>O (10 equiv.) into the reaction mixture. The reaction carried out under nitrogen atmosphere, and the reaction tube was flushed with nitrogen. The tube was tightly closed and the reaction was monitored from room temperature to 90 °C for 24 h according to the conversion estimated by TLC. The reaction was monitored by TLC and after completion, the reaction mixture was cooled to room temperature, and diluted with DCM (10 mL), then filtered through a short pad of celite and washed with DCM (20 mL x 3). The filtrate was concentrated and the residue was taken up for NMR analysis. The amount of deuterium incorporation was determined by <sup>1</sup>H NMR analysis.

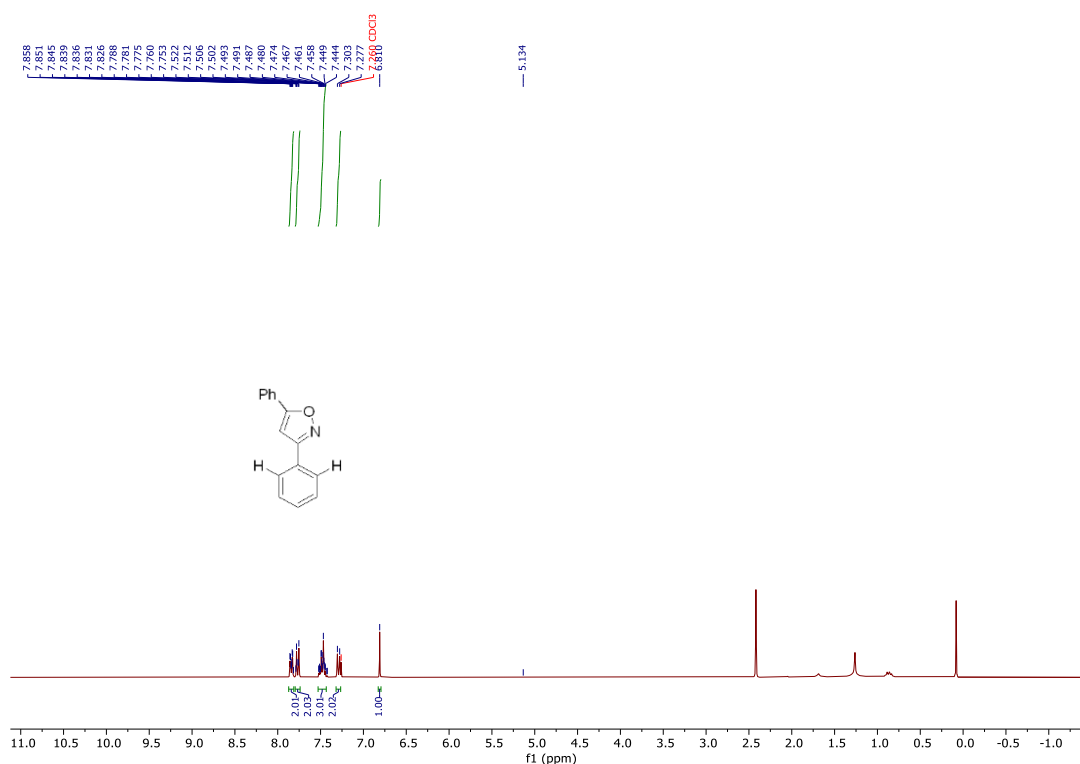

### B. Procedure for H/D-Exchange experiment with TIPS-EBX in D<sub>2</sub>O:

To a clean oven-dried 15 mL sealed tube equipped with a magnetic stir bar were sequentially added isoxazole derivatives (0.1 mmol, 1.0 equiv), [RhCp\*Cl<sub>2</sub>]<sub>2</sub> (4 mol %, 2.63 mg), AgSbF<sub>6</sub> (20 mol %), then DCE (1.5 mL) was added, followed by the addition of D<sub>2</sub>O (10 equiv.) into the reaction mixture. TIPS-EBX (3.0 equiv.) was then added into the reaction mixture. The reaction carried out under nitrogen atmosphere, and the reaction tube was flushed with nitrogen. The tube was tightly closed and the reaction was monitored from room temperature to 90 °C for 24 h according to the conversion estimated by TLC. The reaction was monitored by TLC and after completion, the reaction mixture was cooled to room temperature, and diluted with DCM (10 mL), then filtered through a short pad of celite and washed with DCM (20 mL x 3). The filtrate was concentrated and the residue was taken up for NMR analysis. The amount of deuterium incorporation was determined by <sup>1</sup>H NMR analysis.

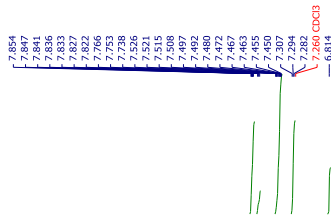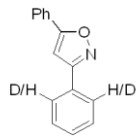

(75% deuteration at each ortho position)

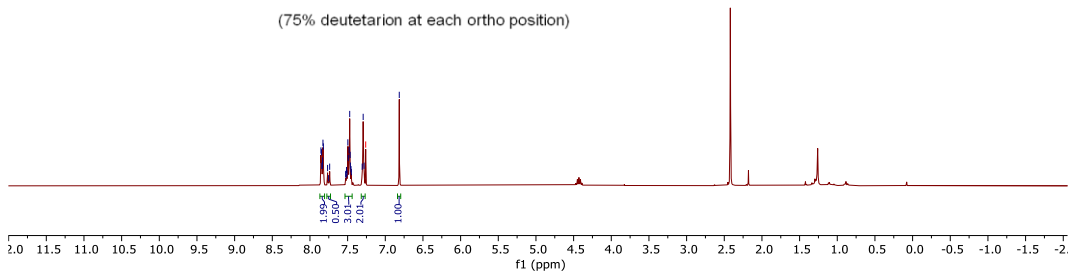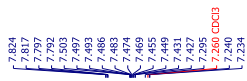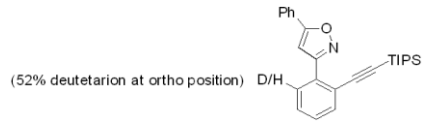

(52% deuteration at ortho position)

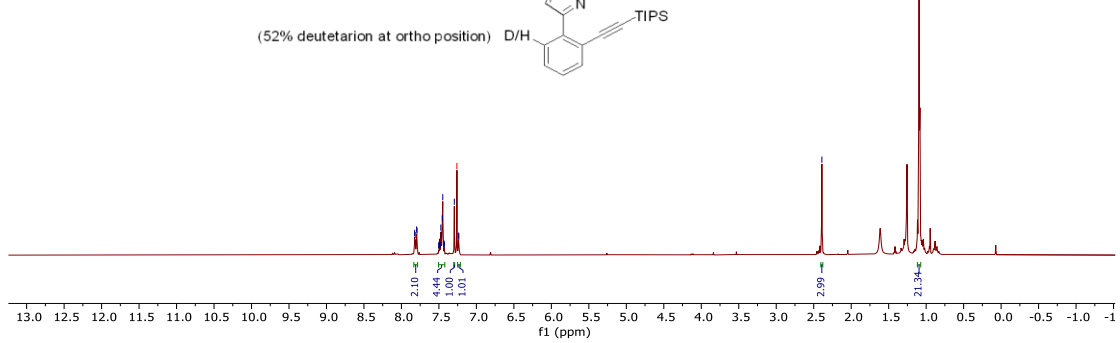

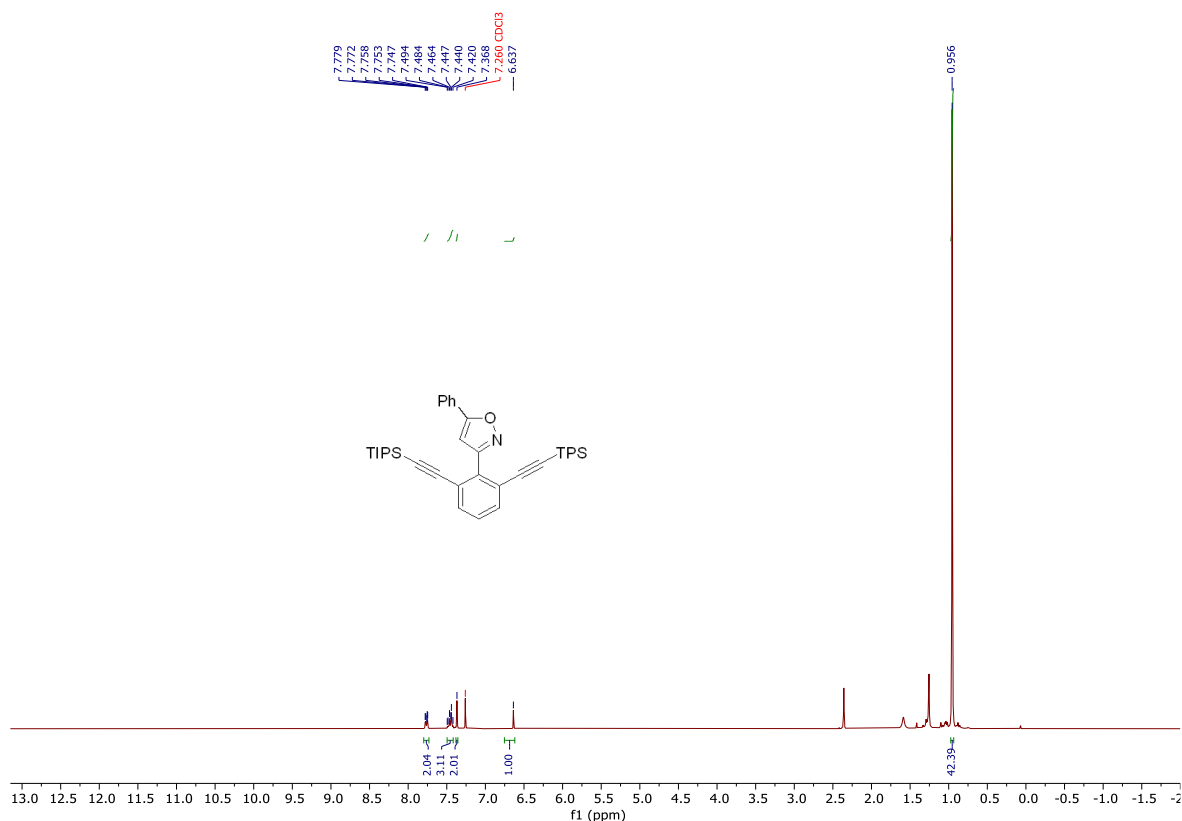

### C. Procedure for radical inhibition experiment with TEMPO:

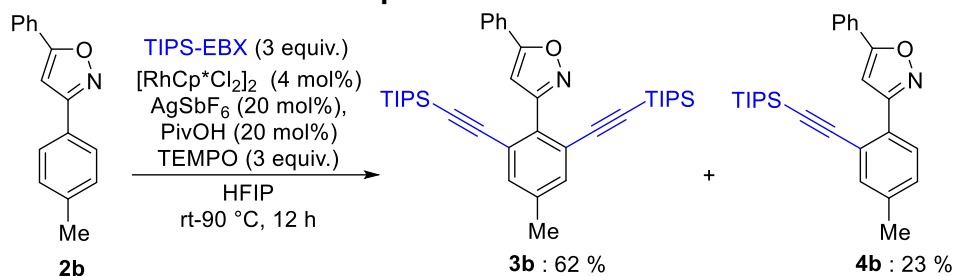

To a clean oven-dried 15 mL sealed tube equipped with a magnetic stir bar were sequentially added isoxazole derivatives (0.02 mmol, 1.0 equiv),  $[\text{RhCp}^*\text{Cl}_2]_2$  (4 mol %, 0.53 mg),  $\text{AgSbF}_6$  (20 mol %),  $\text{PivOH}$  (20 mol%), then HFIP (1.5 mL) was added, followed by the addition of TIPS-EBX (3.0 equiv.) into the reaction mixture. TEMPO (3.0 equiv.) was then added into the reaction mixture. The reaction carried out under nitrogen atmosphere, and the reaction tube was flushed with nitrogen. The tube was tightly closed and the reaction was monitored from room temperature to 90 °C for 12 h according to the conversion estimated by TLC. The reaction was monitored by TLC and after completion, the reaction mixture was cooled to room temperature, and diluted with DCM (10 mL), then filtered through a short pad of celite and washed with DCM (20 mL x 3). The filtrate was concentrated and the residue was taken up for NMR analysis. The desired products 3b and 4b were obtained in 62% and 23% yields respectively.

## 9. References:

- S1. (a) D. P. Hari, P. Caramenti, L. Schouwey, M. Chang, S. Nicolai, D. Bachert, T. Wright, C. Orella, J. Waser *Org. Process Res. Dev* 2020, **24**, 106. (b) R. Frei, M. D. Wodrich, D. P. Hari, P.-A. Borin, C. Chauvier, J. Waser *J. Am. Chem. Soc.* 2014, **136**, 16563. (c) J. P. Brand, C. Chevalley, R. Scopelliti, J. Waser *Chem. Eur. J.* 2012, **18**, 5655. (d) M. Cao, Y. Ren, R. Zhang, H. Xu, P. Cheng, H. Xu, Y. Xu, P. Li *Org. Lett.* 2023, **25**, 6300 (e) B. Liu, C. -H. Lim, G. M. Miyake *J. Am. Chem. Soc.* 2018, **140**, 12829.
- S2. (a) C. E. P. Galvis, V. V. Kouznetsov, *Org. Biomol. Chem.* 2013, **11**, 407. (b) M. I. Alam, M. A. Alam, O. Alam, A. Nargotra, S. C. Taneja, S. Koul *Tetrahedron.* 2016, **114**, 209. (c) J. Y. Jung, S. H. Jung, H. Y. Koh, A. N. Pae, W. -K. Park, J. Y. Kong *B Korean Chem Soc.* 2006, **27**, 1861.
- S3. B. Roy, R. N. De *Monatsh. Chem.* 2010, **141**, 763.
- S4. S. Tang, J. He, Y. Sun, L. He, X. She *Org. Lett.* 2009, **11**, 3982.
- S5. A. M. Jawalekar, E. Reubsaet, F. P. J. T. Rutjes, F. L. van Delft *Chem. Commun.*, 2011, **47**, 3198.
- S6. S. Mohammed, R. A. Vishwakarma, S. B. Bharateab *RSC Adv.*, 2015, **5**, 3470.
- S7. Y. Sun, A. Abdukader, H. Zhang, W. Yang, C. Liu *RSC Adv.*, 2017, **7**, 55786.
- S8. P. Kumar, M. Kapur *Org. Lett.* 2019, **21**, 7, 2134.
- S9. M. Duan, G. Hou, Y. Zhao, C. Zhu, C. J. Songa *Org. Chem.* 2022, **87**, 16, 11222.
- S10 M. Antony P, G. L. Balaji, P. Iniyavan, H. Ila, *Org. Chem.* 2020, **85**, 23, 15422.
- S11. N. Pramanik, S. Sarkar, D. Roy, S. Debnath, S. Ghosh, S. Khamarui, D. K. Maiti *RSC Adv.*, 2015, **5**, 101959.
- S12. Y. Zhang, Z. Long, Y. Le, L. Liu, L. Yan *Heterocycles* 2022, **104**, 1098.
- S13. X. Li, G. Wu, X. Liu, Z. Zhu, Y. Huo, H. Jiang *J. Org. Chem.* 2017, **82**, 13003.
- S14. A. S. Baghel, A. Kumar *Chem. Commun.* 2022, **58**, 11304.
- S15. V. G. Landge, G. Jaiswal, E. Balaraman *Org. Lett.* 2016, **18**, 812.
- S16. M. Rubin, A. Trofimov, V. Gevorgyan *J. Am. Chem. Soc.* 2005, **127**, 29, 10243.
- S17. B. P. Carrow, J. F. Hartwig *J. Am. Chem. Soc.* 2011, **133**, 2116.

## 10. Crystallographic data of compound 3b (CCDC 2340037):

---

|                        |                          |                                  |                          |
|------------------------|--------------------------|----------------------------------|--------------------------|
| Bond precision:        | C-C = 0.0179 Å           | Wavelength=0.71073               |                          |
| Cell:                  | a=17.157 (4)<br>alpha=90 | b=13.818 (3)<br>beta=111.124 (5) | c=17.350 (3)<br>gamma=90 |
| Temperature:           | 299 K                    |                                  |                          |
|                        | Calculated               | Reported                         |                          |
| Volume                 | 3836.9 (14)              | 3836.8 (13)                      |                          |
| Space group            | P 21/n                   | P 21/n                           |                          |
| Hall group             | -P 2yn                   | -P 2yn                           |                          |
| Moiety formula         | C38 H53 N O Si2          | C38 H53 N O Si2                  |                          |
| Sum formula            | C38 H53 N O Si2          | C38 H53 N O Si2                  |                          |
| Mr                     | 595.99                   | 595.99                           |                          |
| Dx, g cm <sup>-3</sup> | 1.032                    | 1.032                            |                          |
| Z                      | 4                        | 4                                |                          |
| Mu (mm <sup>-1</sup> ) | 0.119                    | 0.119                            |                          |
| F000                   | 1296.0                   | 1296.0                           |                          |

|            |              |              |
|------------|--------------|--------------|
| F000'      | 1297.05      |              |
| h, k, lmax | 15, 12, 15   | 15, 12, 14   |
| Nref       | 3096         | 2713         |
| Tmin, Tmax | 0.983, 0.991 | 0.983, 0.991 |
| Tmin'      | 0.981        |              |

Correction method= # Reported T Limits: Tmin=0.983 Tmax=0.991 AbsCorr =  
MULTI-SCAN

Data completeness= 0.876

Theta(max)= 19.035

R(reflections)= 0.0817( 1806)

wR2 (reflections) =

0.2086( 2713)

S = 1.060

Npar= 379

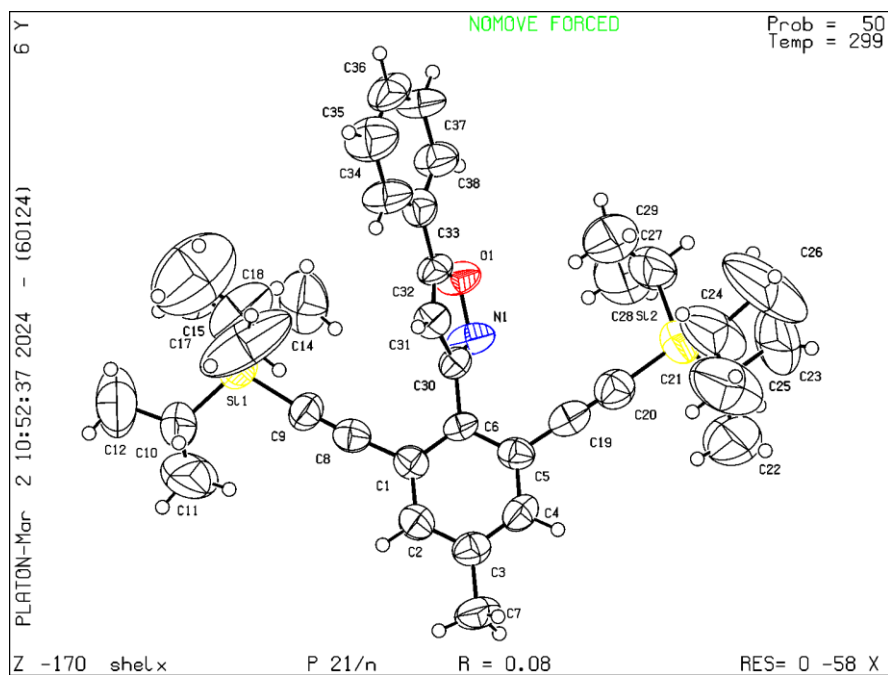

# 11. Copies of NMR-Spectra:

## 3-(4-iodophenyl)-5-phenylisoxazole (1i)

<sup>1</sup>H NMR (300 MHz, CDCl<sub>3</sub>)

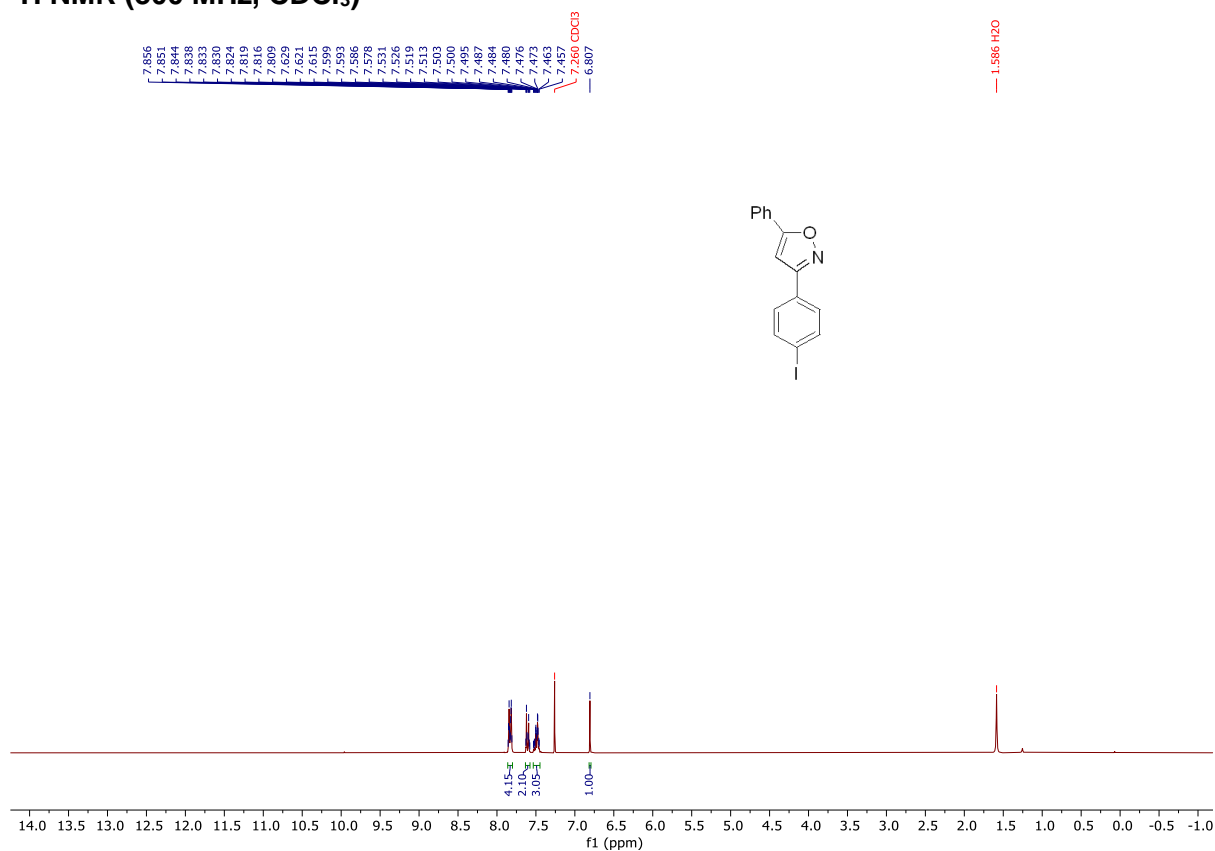

<sup>13</sup>C NMR (101 MHz, CDCl<sub>3</sub>)

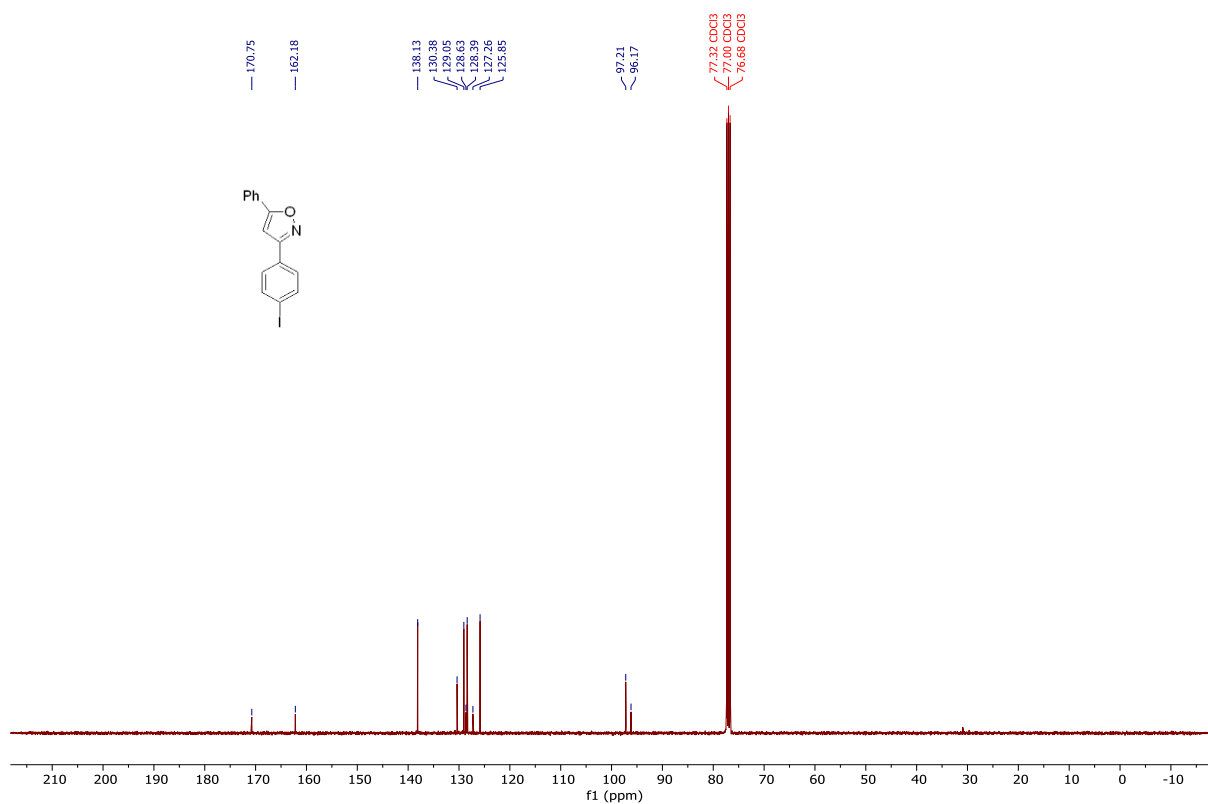



### 3-(2-bromo-5-fluorophenyl)-5-phenylisoxazole (1p)

<sup>1</sup>H NMR (300 MHz, CDCl<sub>3</sub>)

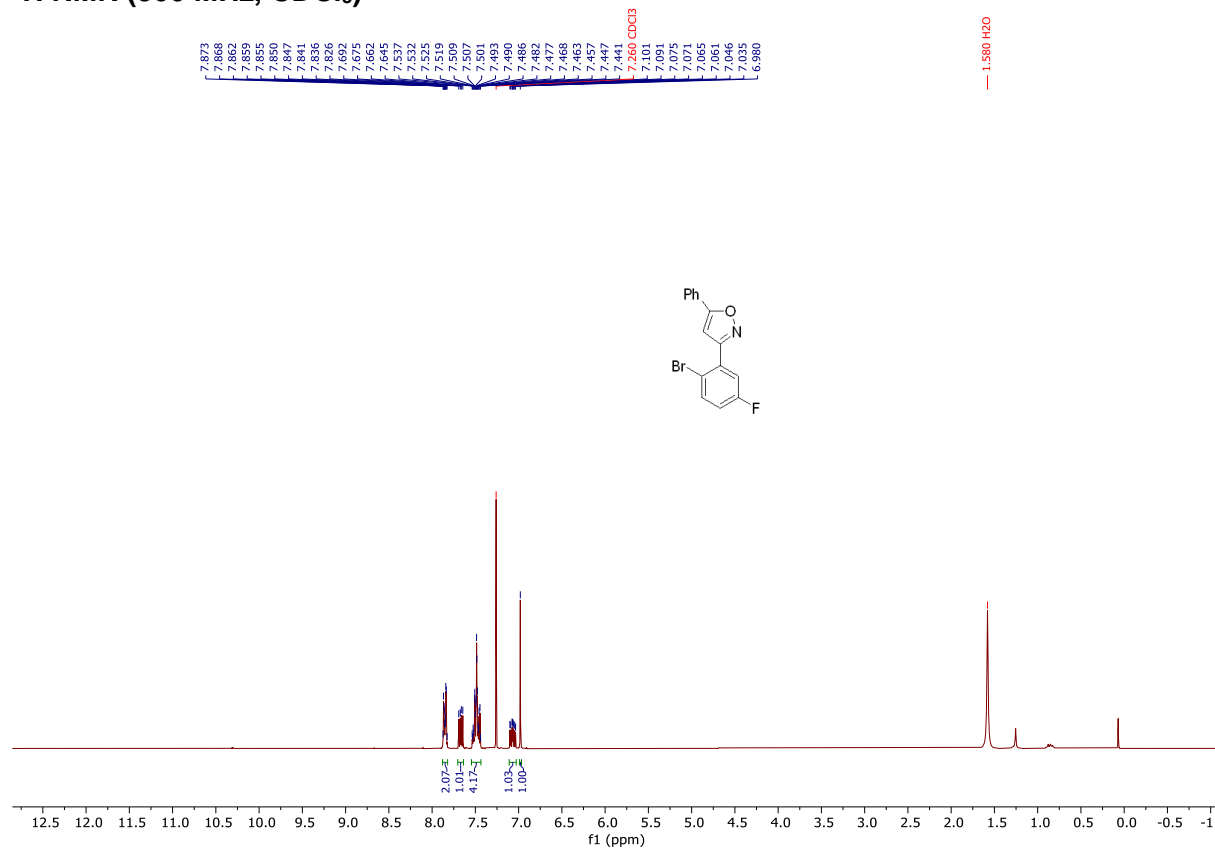

<sup>13</sup>C NMR (75 MHz, CDCl<sub>3</sub>)

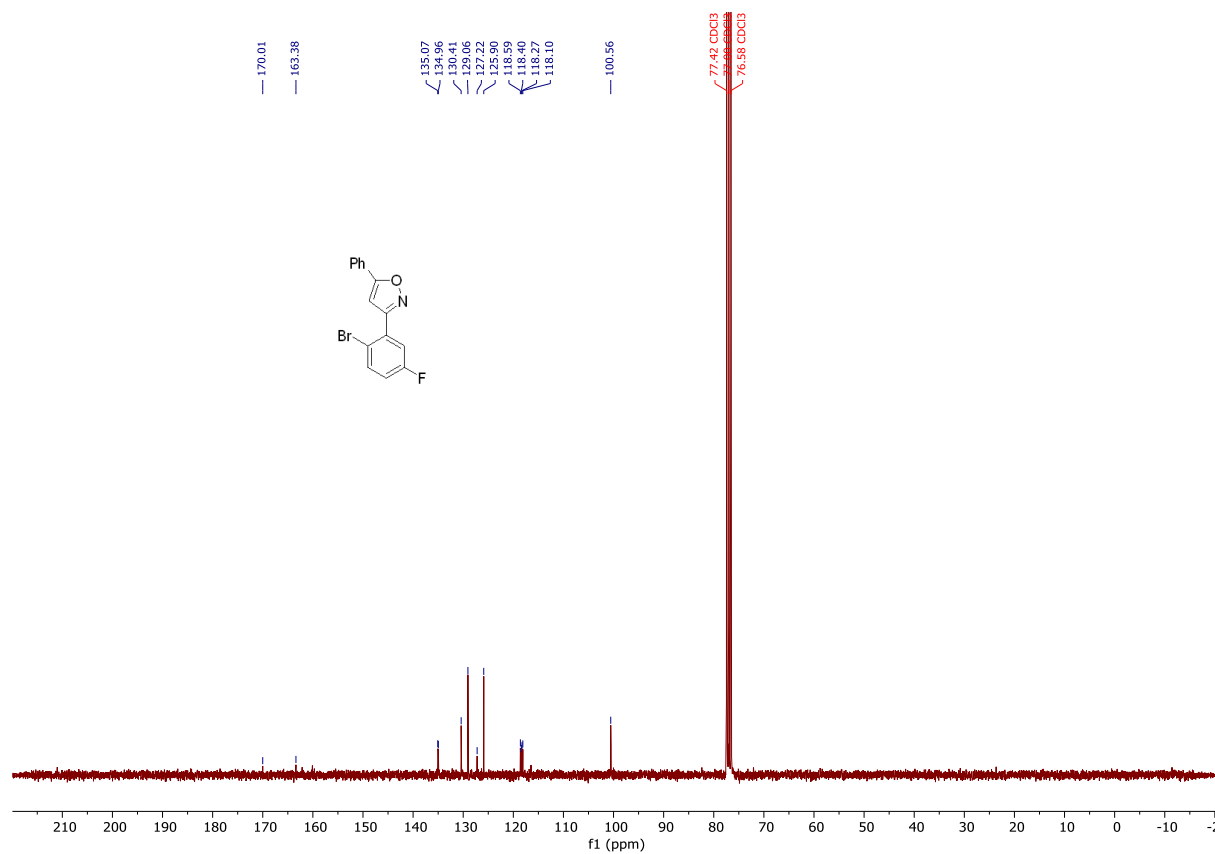

# 5-(4-methoxyphenyl)-3-(o-tolyl)isoxazole (1x)

<sup>1</sup>H NMR (300 MHz, CDCl<sub>3</sub>)

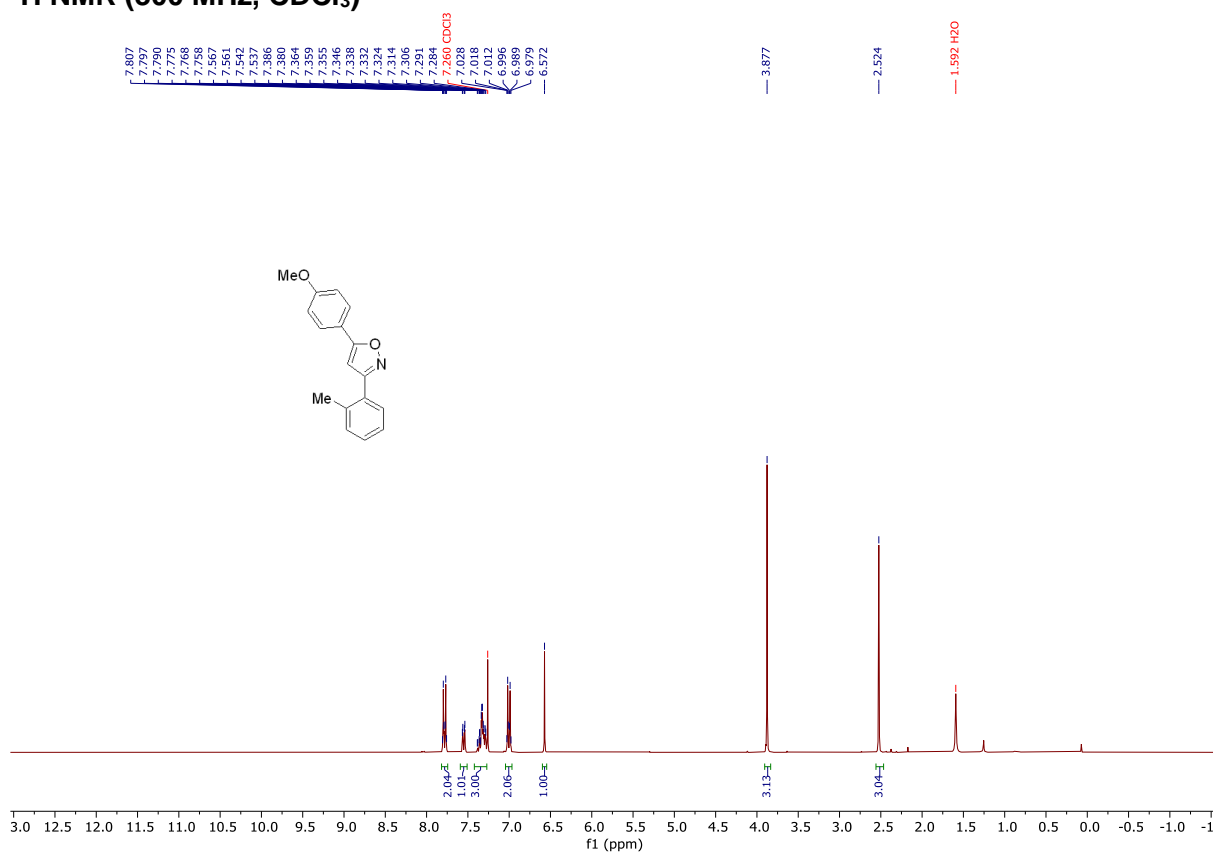

<sup>13</sup>C NMR (75 MHz, CDCl<sub>3</sub>)

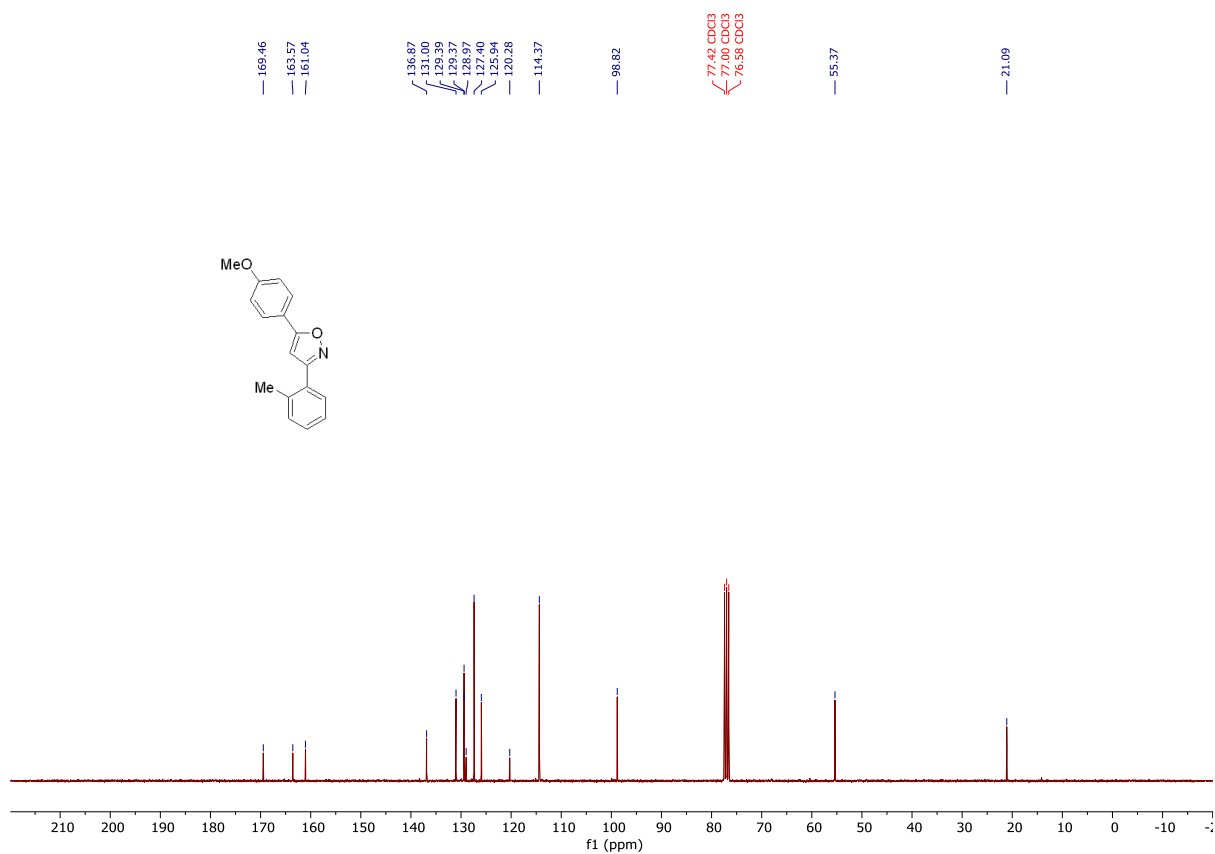

# 5-(3-nitrophenyl)-3-(o-tolyl)isoxazole (1y)

<sup>1</sup>H NMR (400 MHz, CDCl<sub>3</sub>)

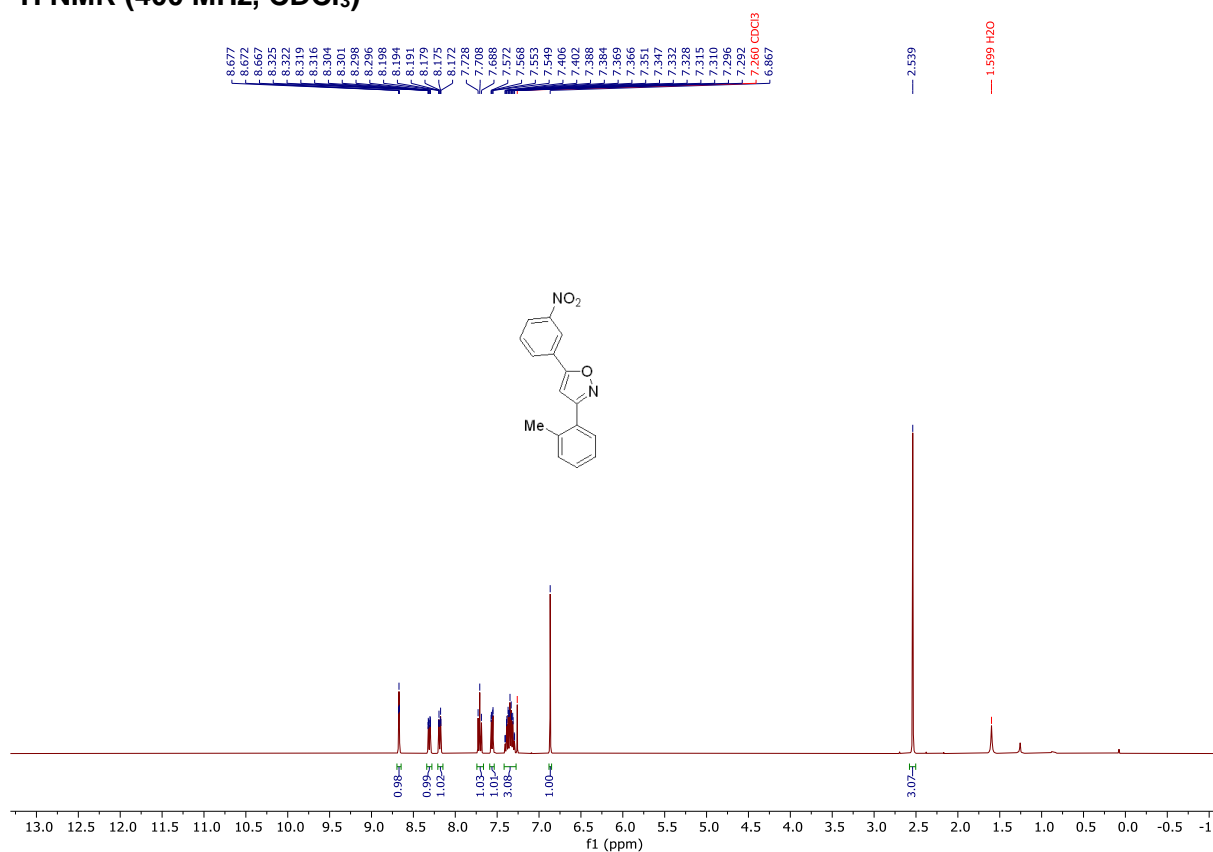

<sup>13</sup>C NMR (75 MHz, CDCl<sub>3</sub>)

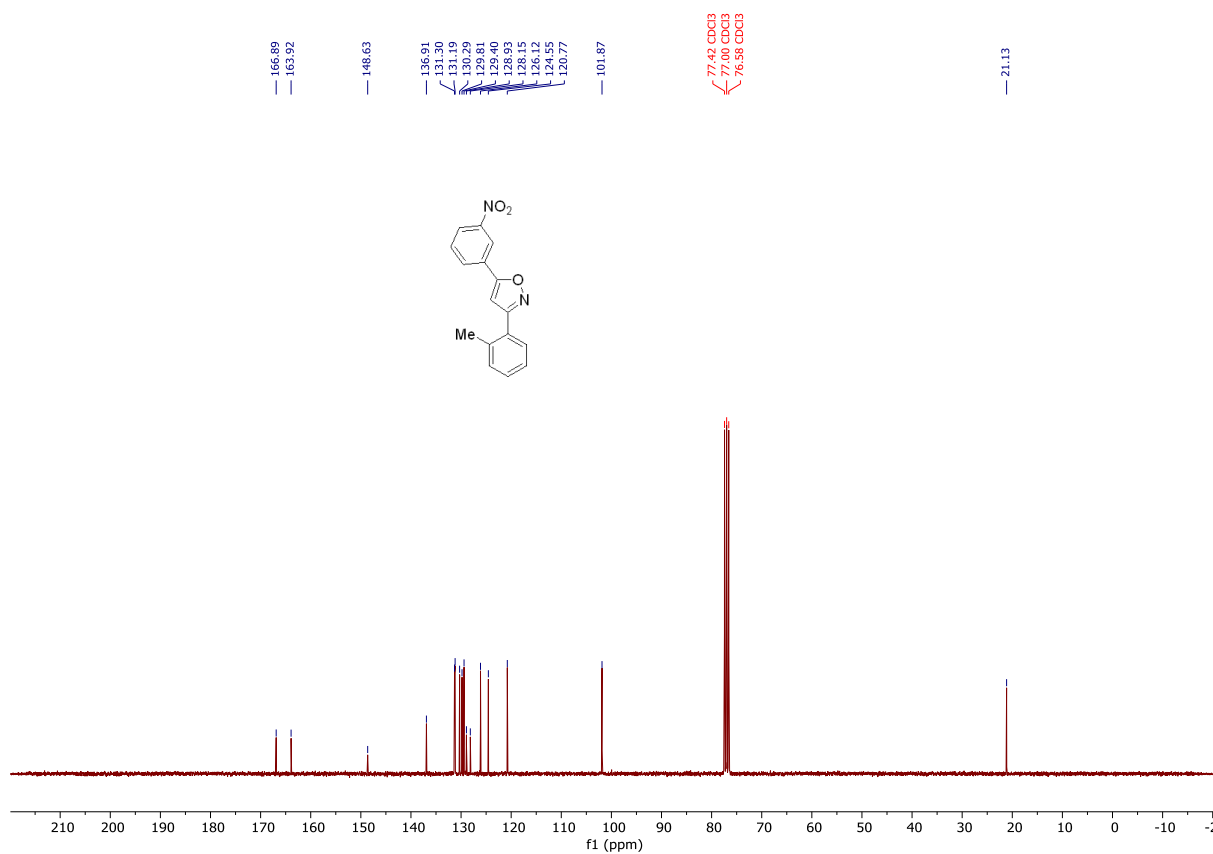

**3-(2,6-bis((triisopropylsilyl)ethynyl)phenyl)-5-phenylisoxazole (3a)**  
<sup>1</sup>H NMR (400 MHz, CDCl<sub>3</sub>)

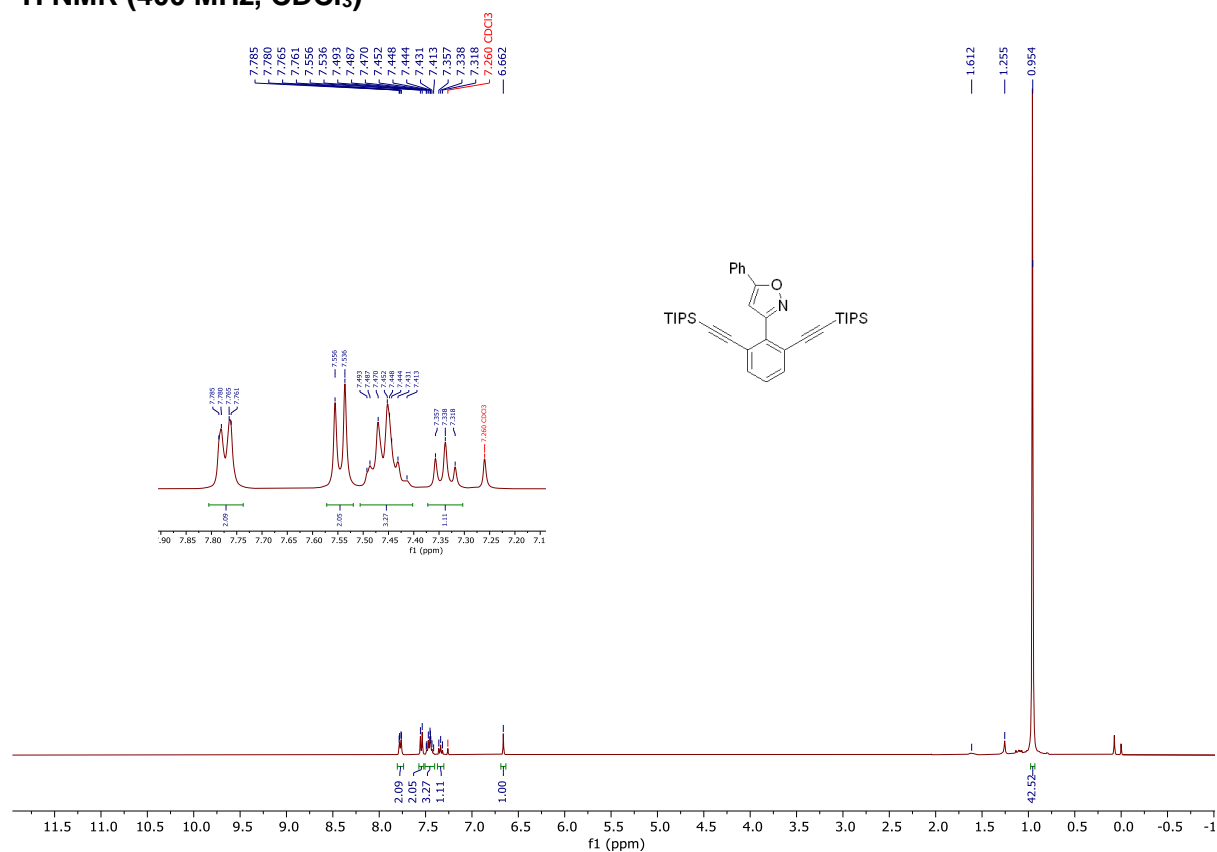

<sup>13</sup>C NMR (75 MHz, CDCl<sub>3</sub>)

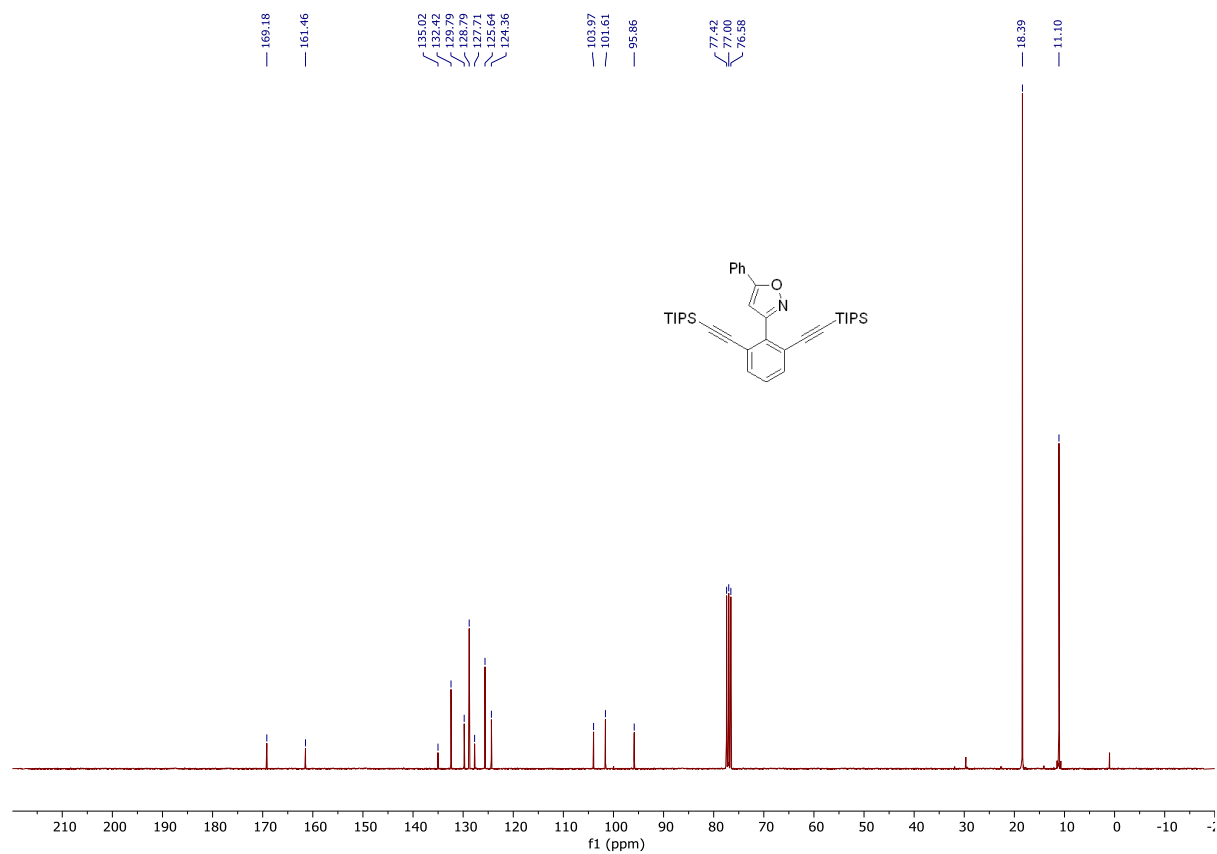



**3-(4-methyl-2,6-bis((triisopropylsilyl)ethynyl)phenyl)-5-phenylisoxazole (3b)**  
**<sup>1</sup>H NMR (300 MHz, CDCl<sub>3</sub>)**

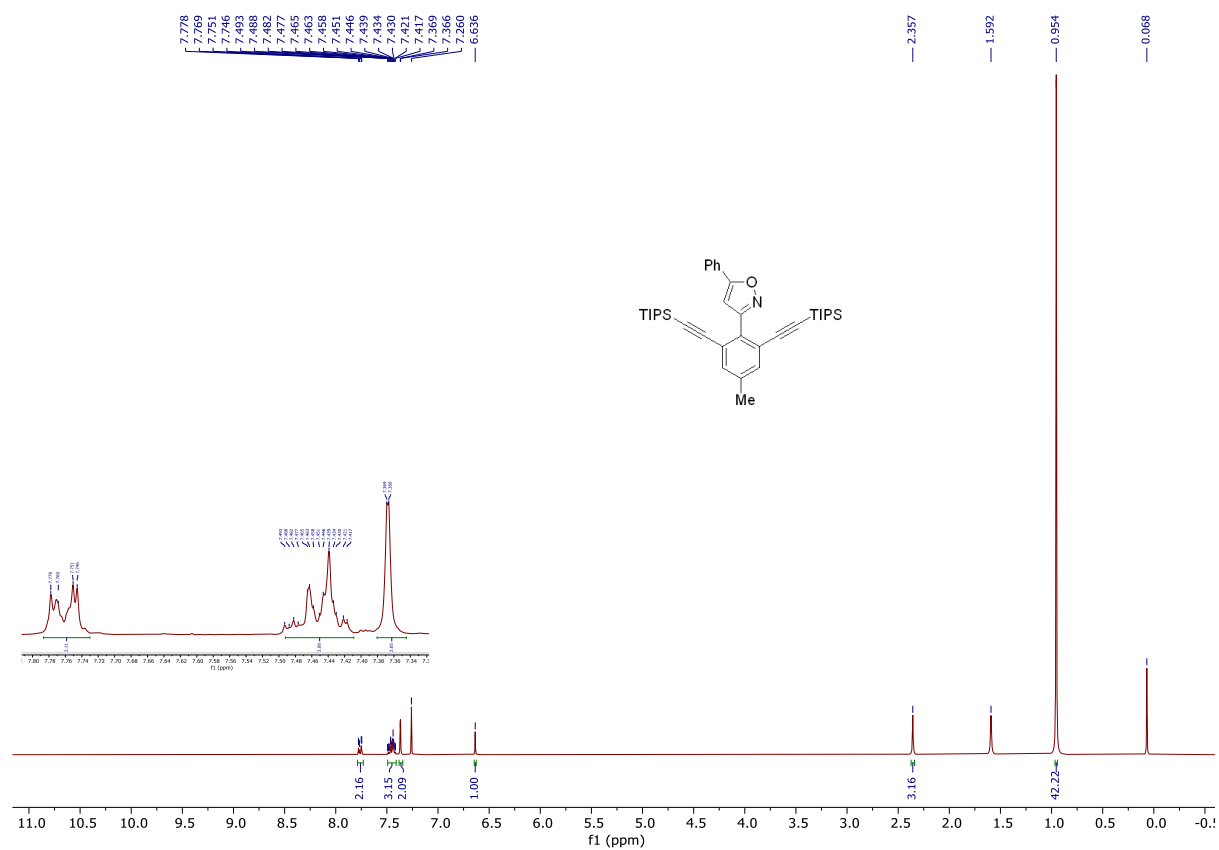

**<sup>13</sup>C NMR (101 MHz, CDCl<sub>3</sub>)**

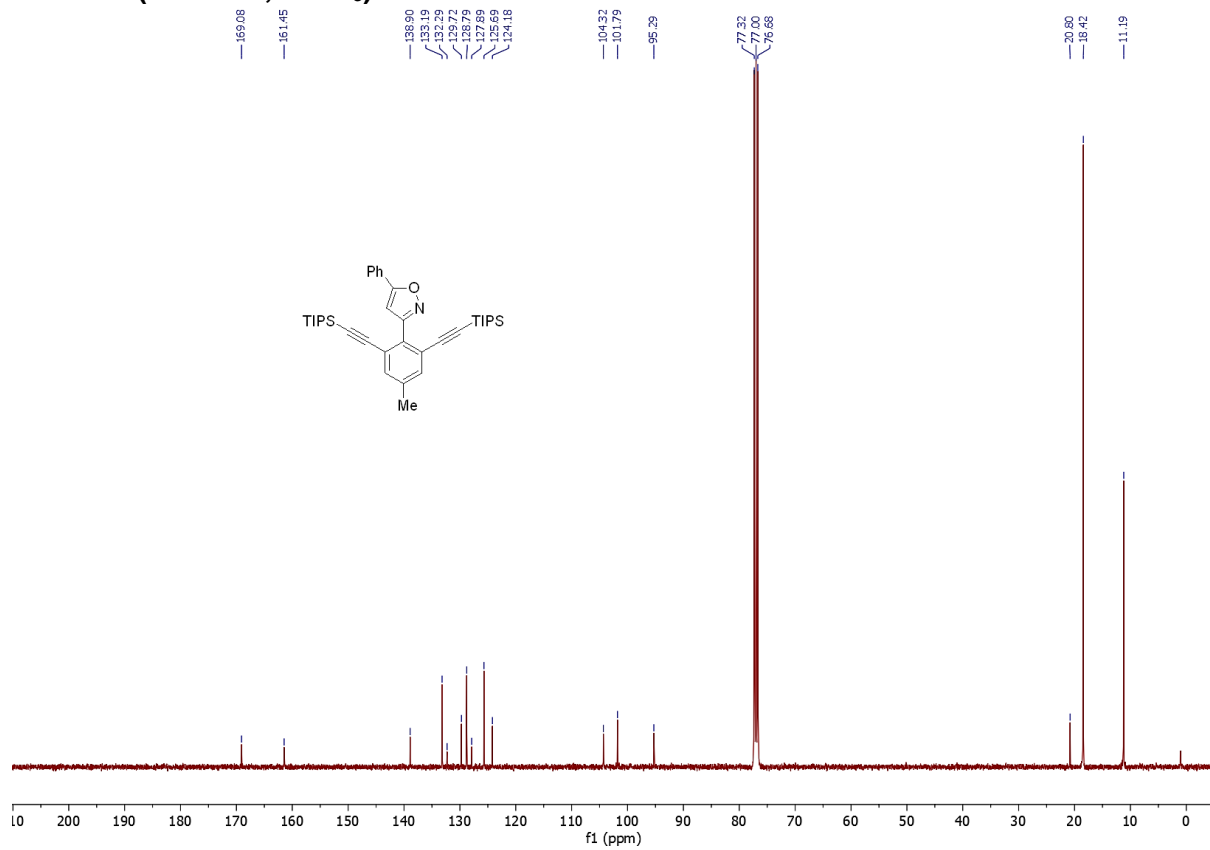

**3-(4-methoxy-2,6-bis((triisopropylsilyl)ethynyl)phenyl)-5-phenylisoxazole (3c)**  
**<sup>1</sup>H NMR (300 MHz, CDCl<sub>3</sub>)**

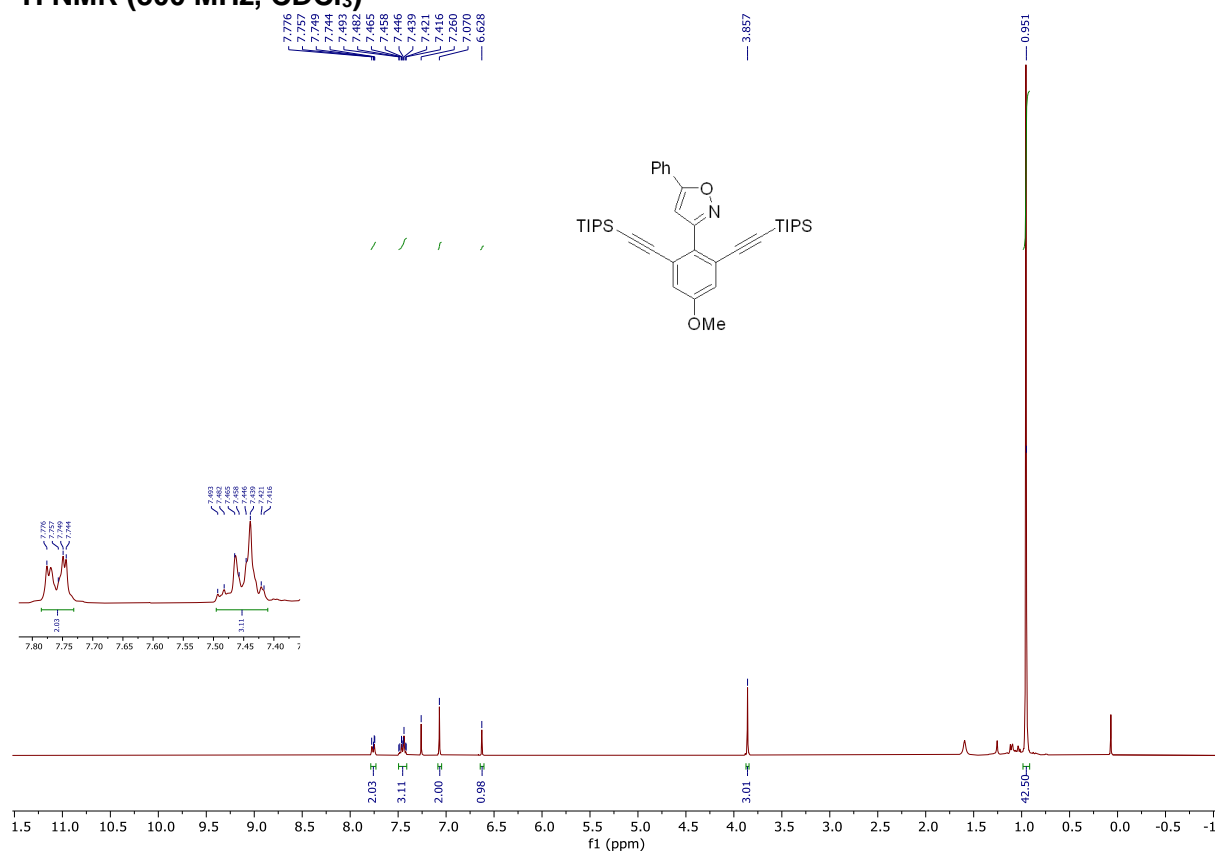

**<sup>13</sup>C NMR (101 MHz, CDCl<sub>3</sub>)**

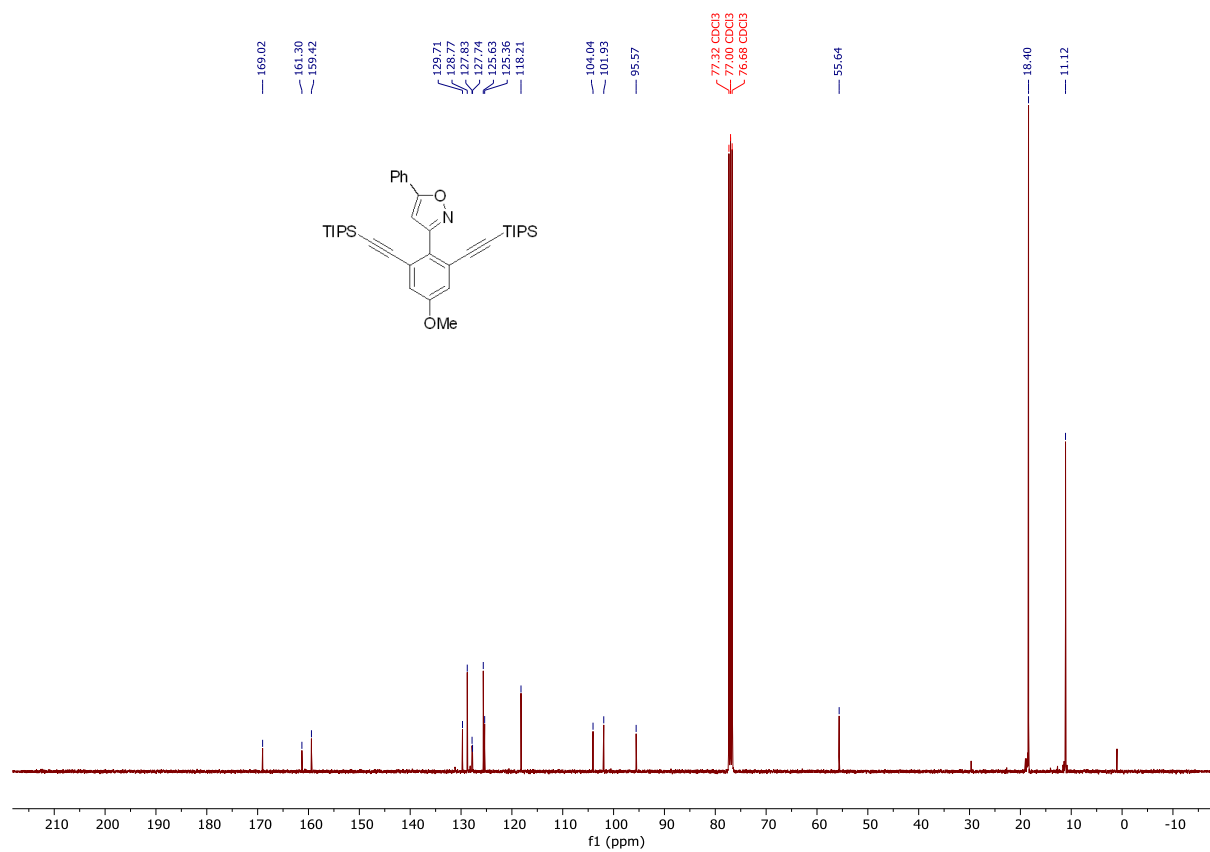

### 4-(5-phenylisoxazol-3-yl)-3,5-bis((triisopropylsilyl)ethynyl)phenol (3d)

<sup>1</sup>H NMR (300 MHz, CDCl<sub>3</sub>)

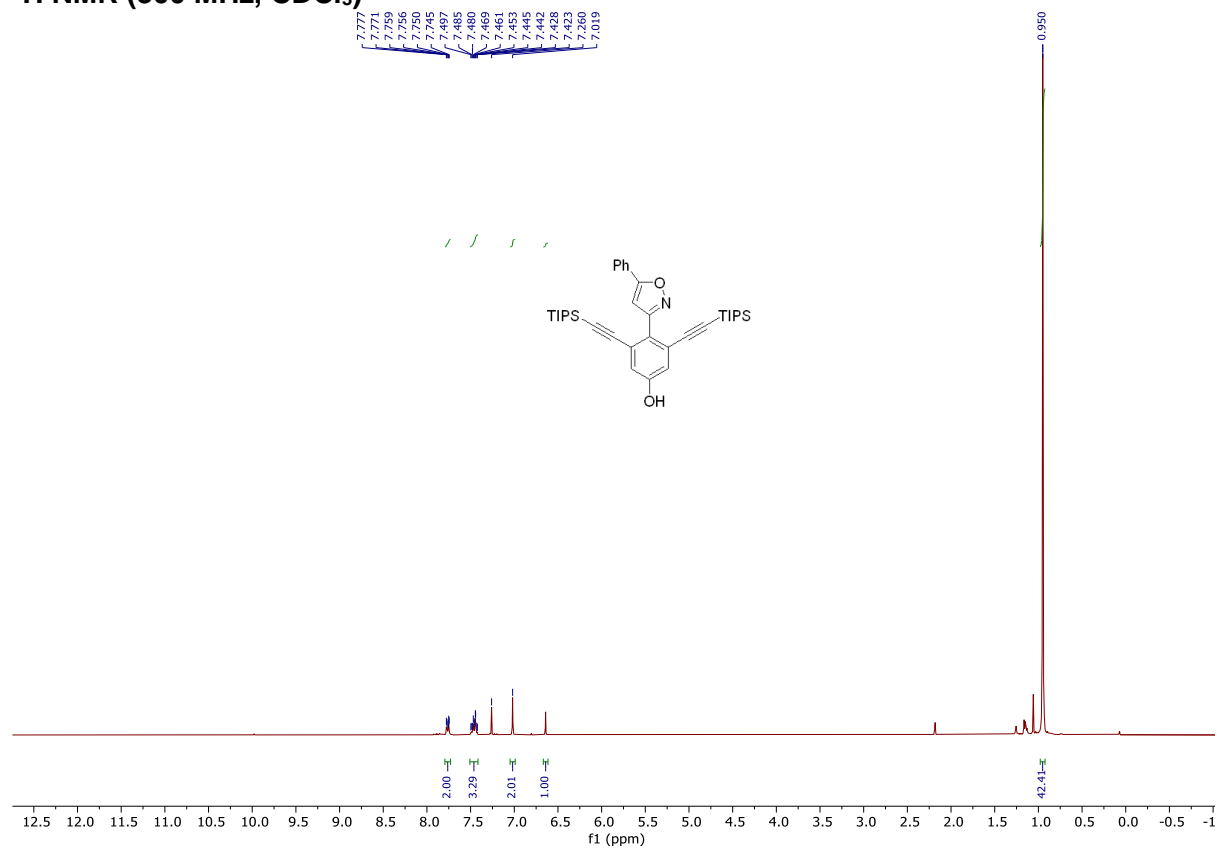

<sup>13</sup>C NMR (101 MHz, CDCl<sub>3</sub>)

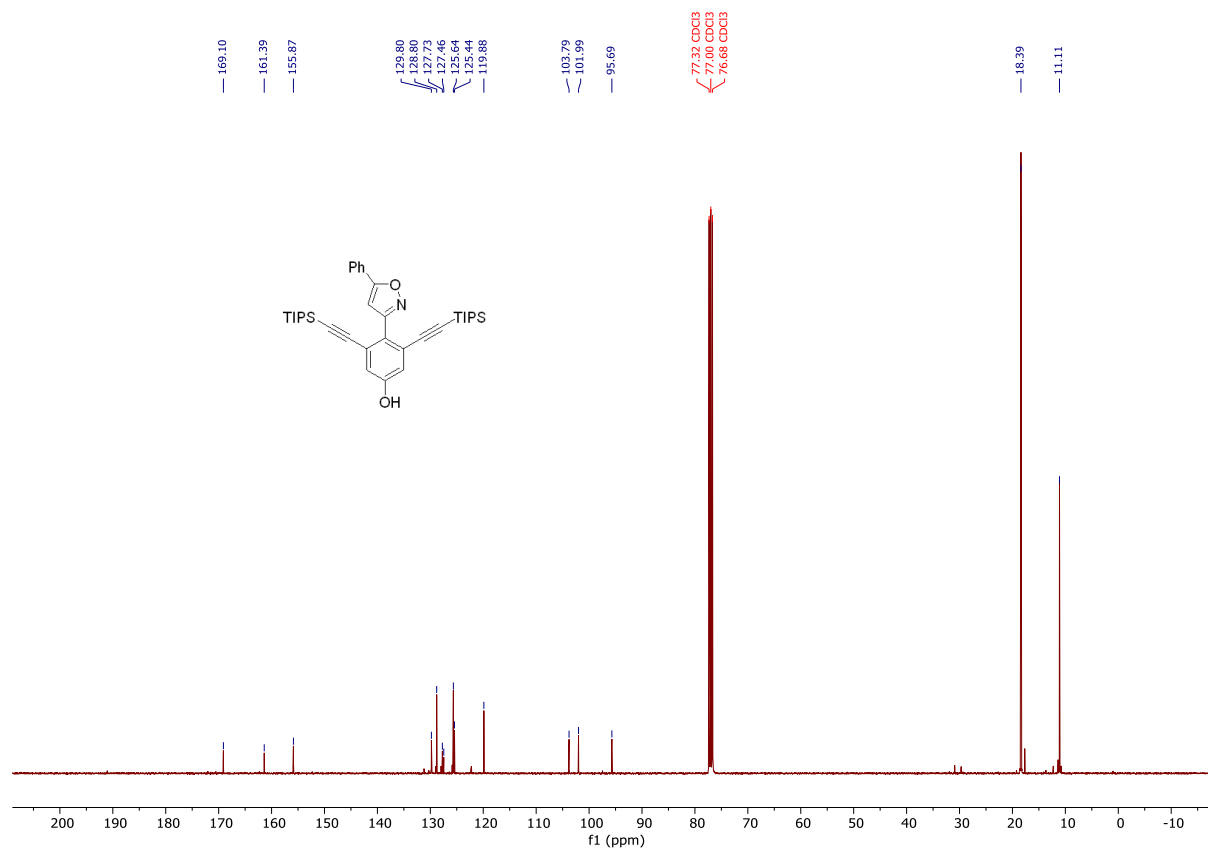



### 3-(4,6-bis((triisopropylsilyl)ethynyl)benzo[d][1,3]dioxol-5-yl)-5-phenylisoxazole (3e)

<sup>1</sup>H NMR (300 MHz, CDCl<sub>3</sub>)

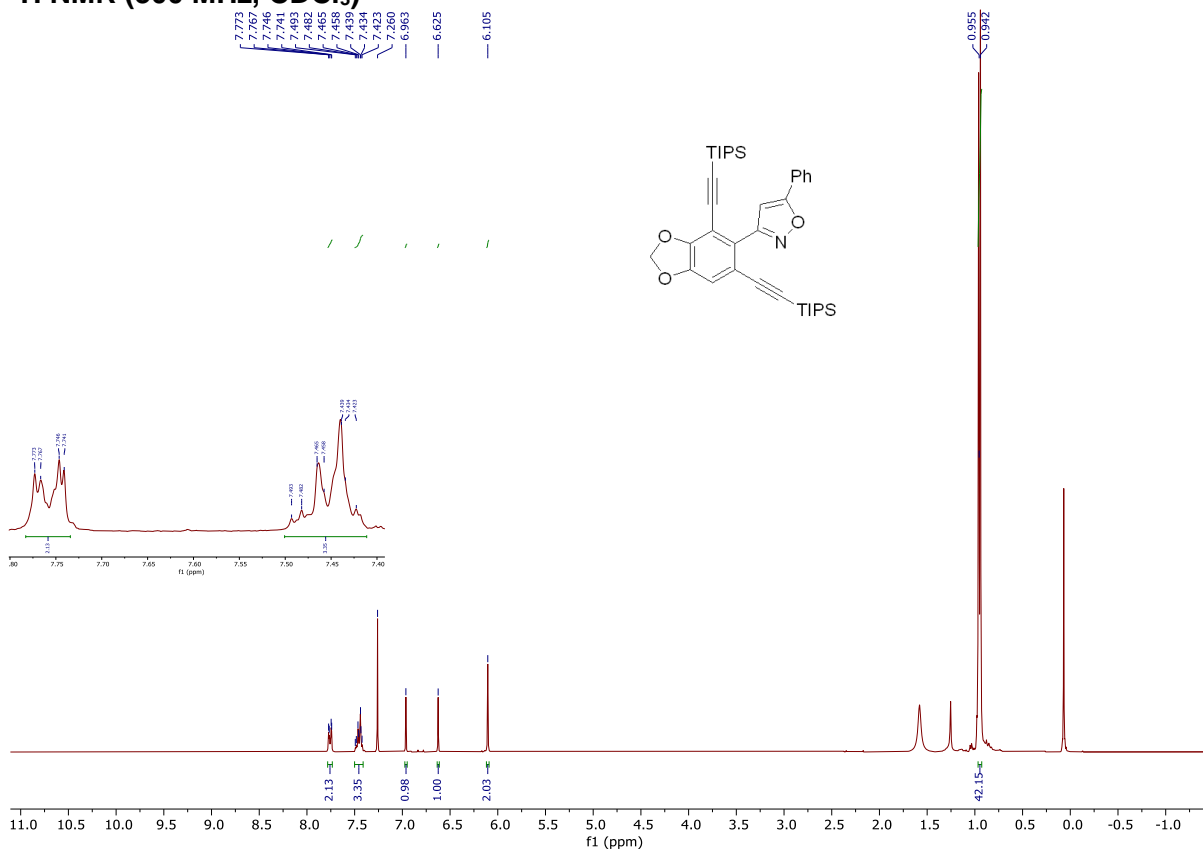

<sup>13</sup>C NMR (101 MHz, CDCl<sub>3</sub>)

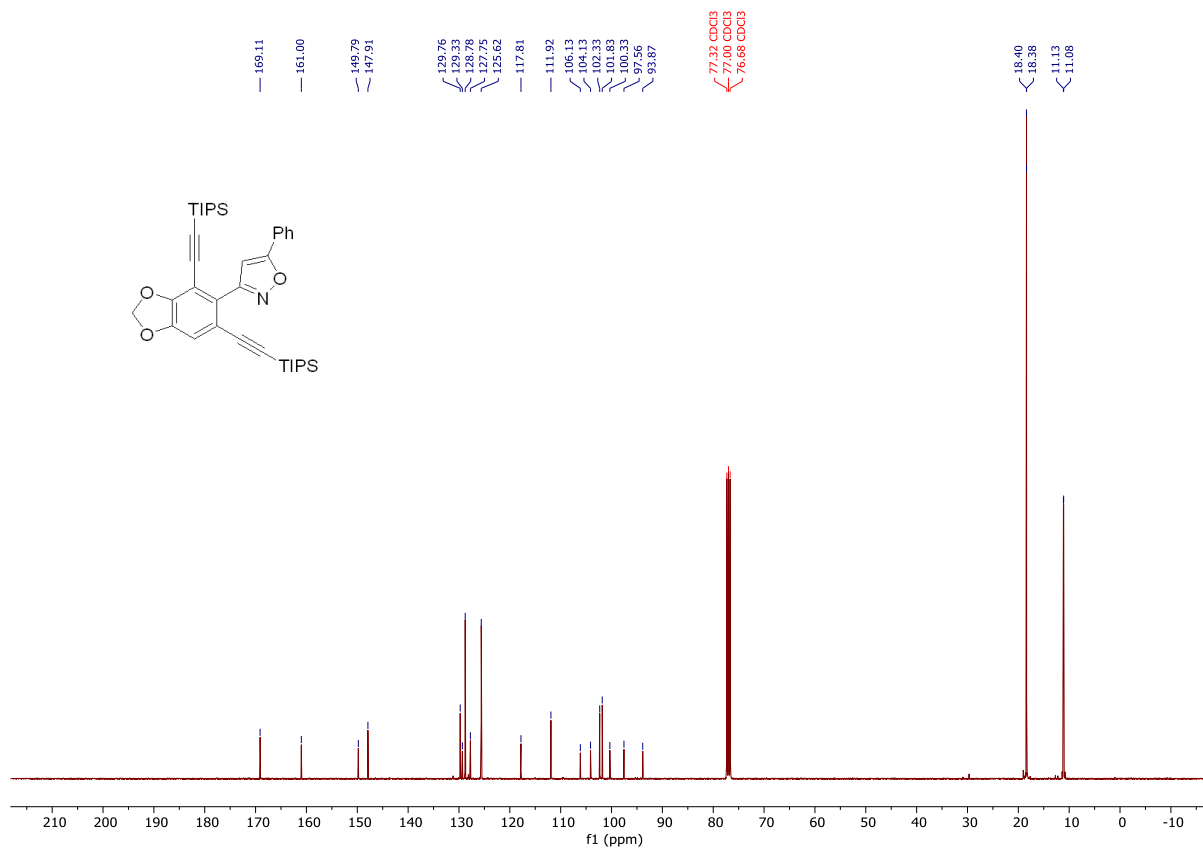

### 3-(4-fluoro-2,6-bis((triisopropylsilyl)ethynyl)phenyl)-5-phenylisoxazole (3f)

<sup>1</sup>H NMR (300 MHz, CDCl<sub>3</sub>)

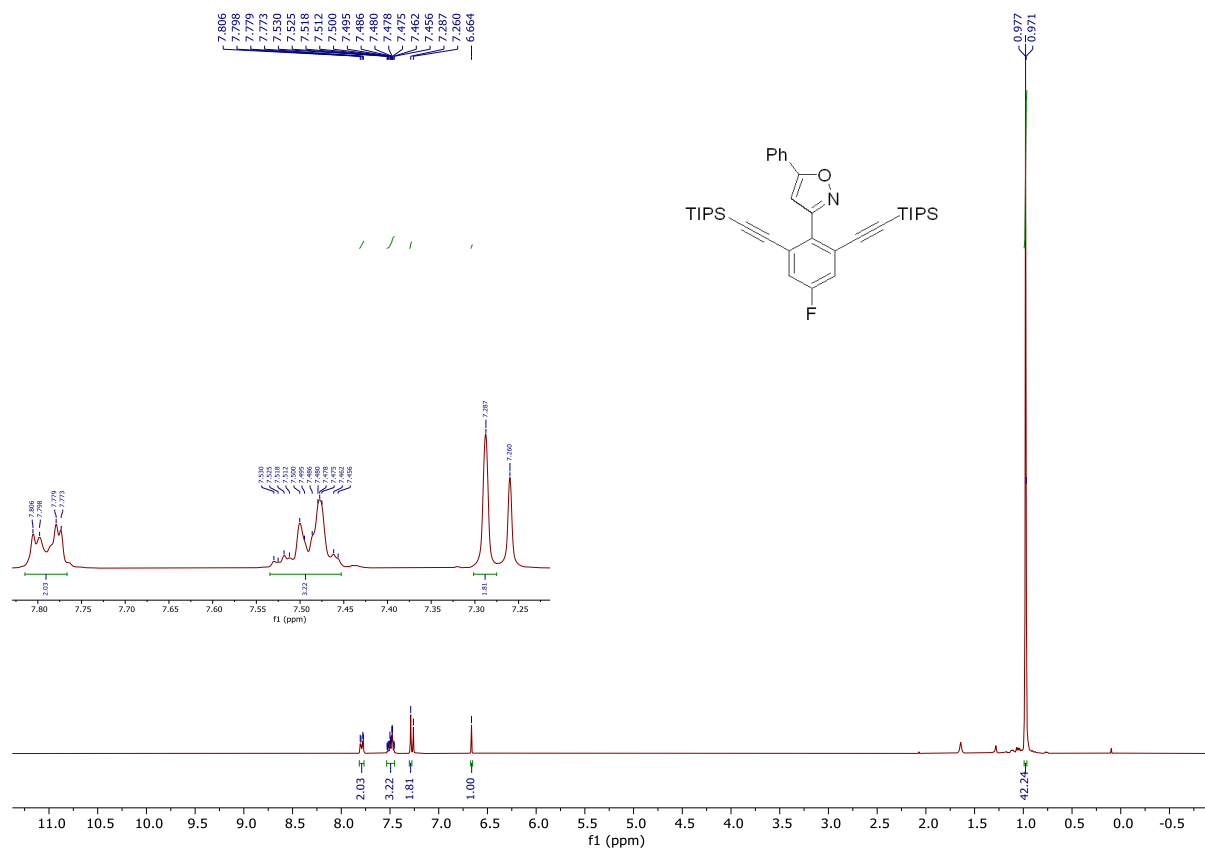

<sup>13</sup>C NMR (75 MHz, CDCl<sub>3</sub>)

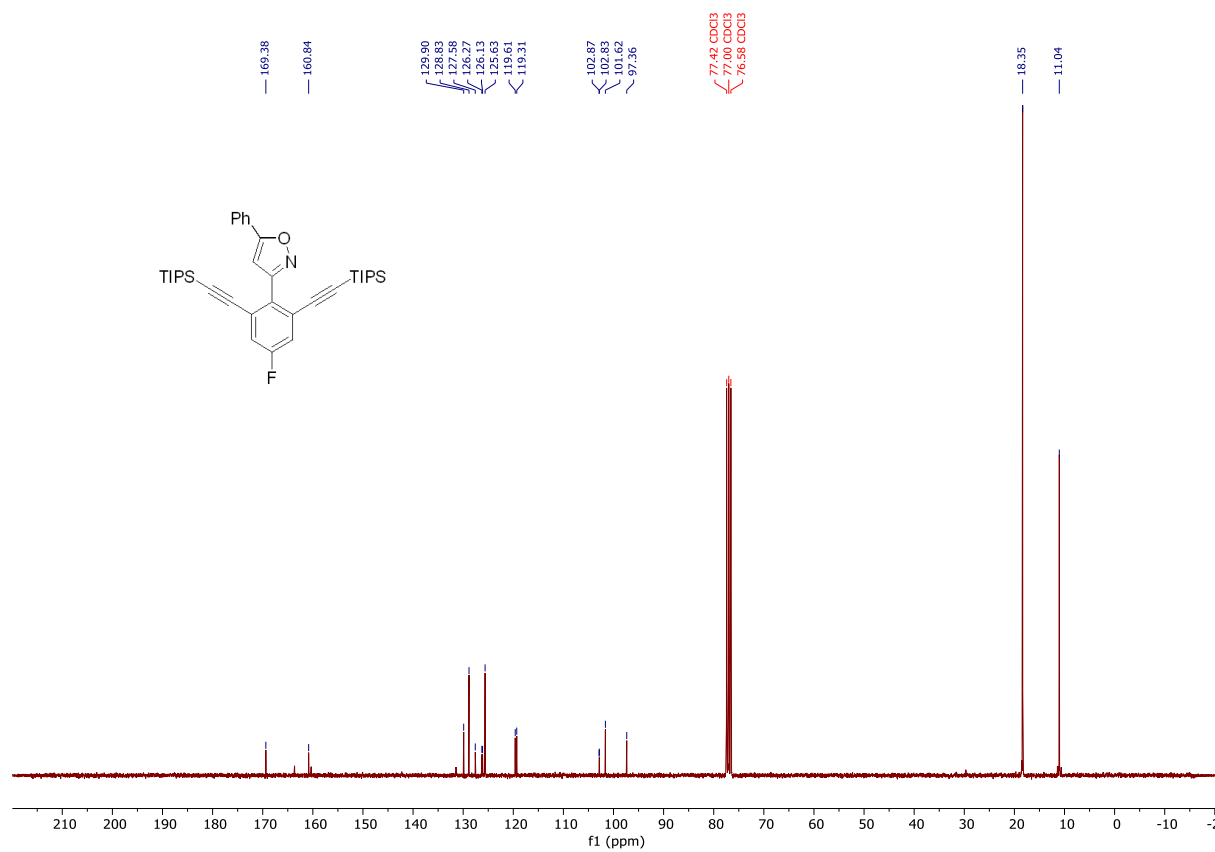

**3-(4-chloro-2,6-bis((triisopropylsilyl)ethynyl)phenyl)-5-phenylisoxazole (3g)**  
**<sup>1</sup>H NMR (400 MHz, CDCl<sub>3</sub>)**

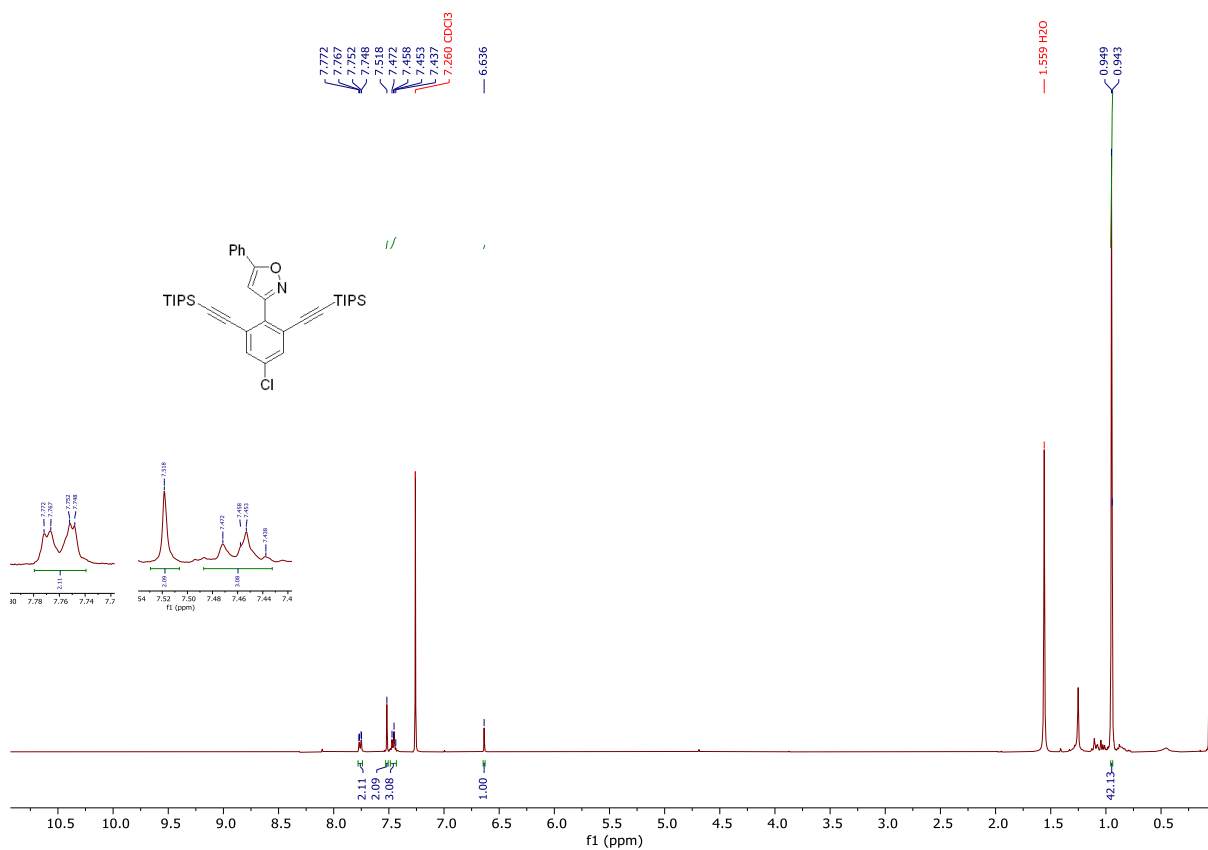

**<sup>13</sup>C NMR (75 MHz, CDCl<sub>3</sub>)**

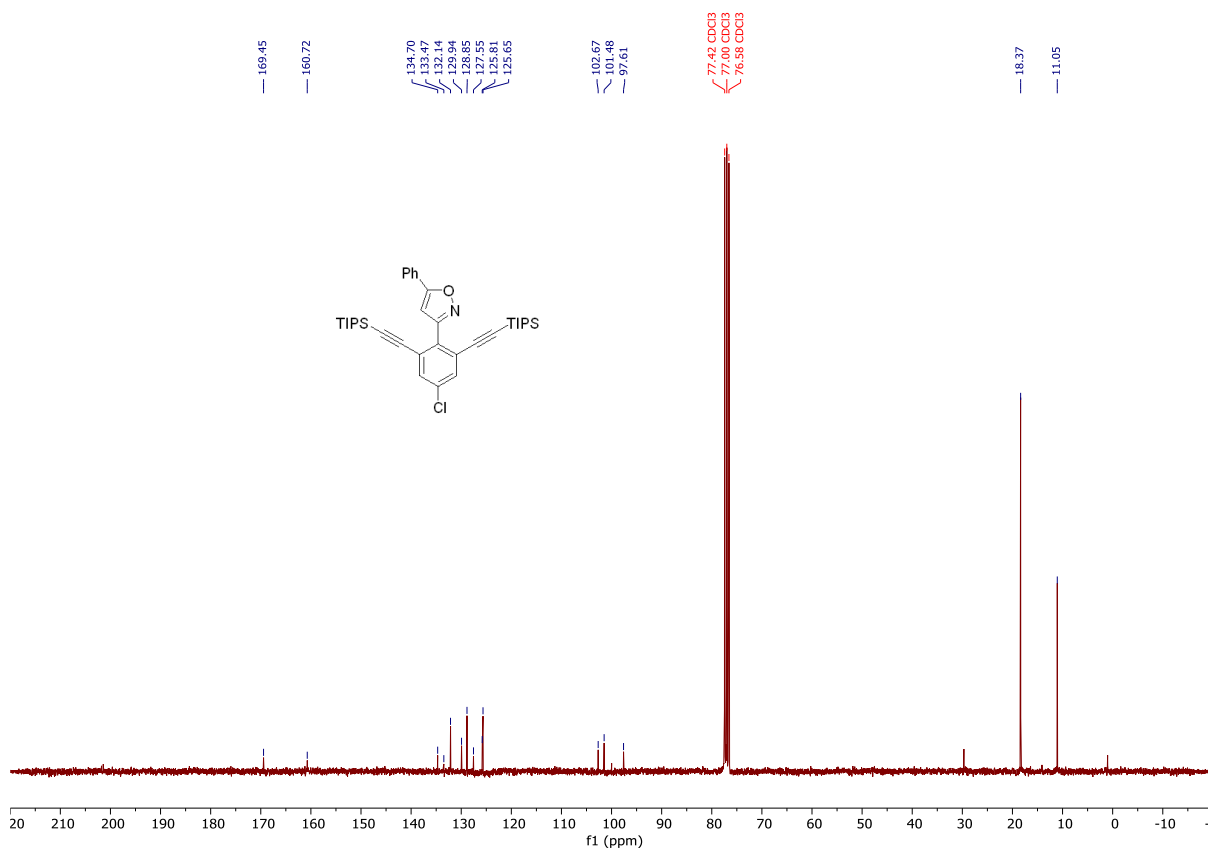

**3-(4-bromo-2,6-bis((triisopropylsilyl)ethynyl)phenyl)-5-phenylisoxazole (3h)**  
**<sup>1</sup>H NMR (300 MHz, CDCl<sub>3</sub>)**

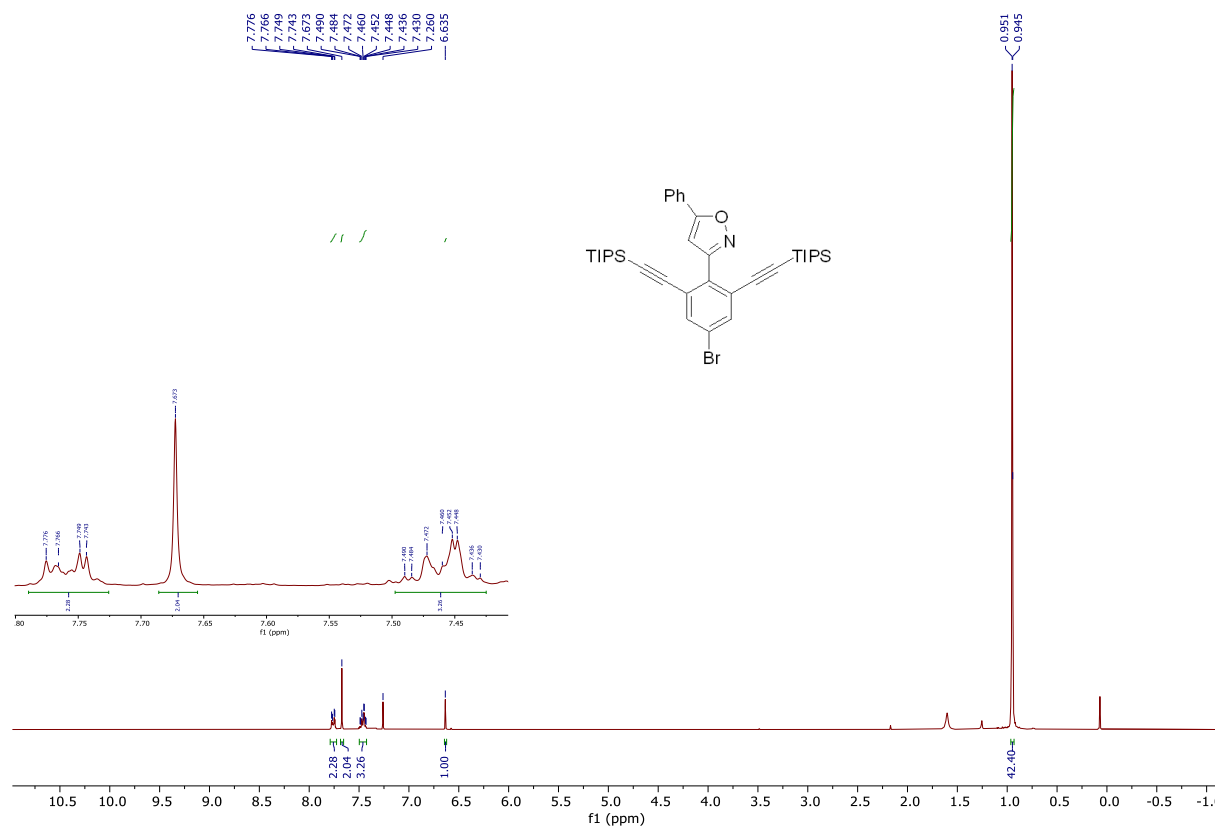

**<sup>13</sup>C NMR (75 MHz, CDCl<sub>3</sub>)**

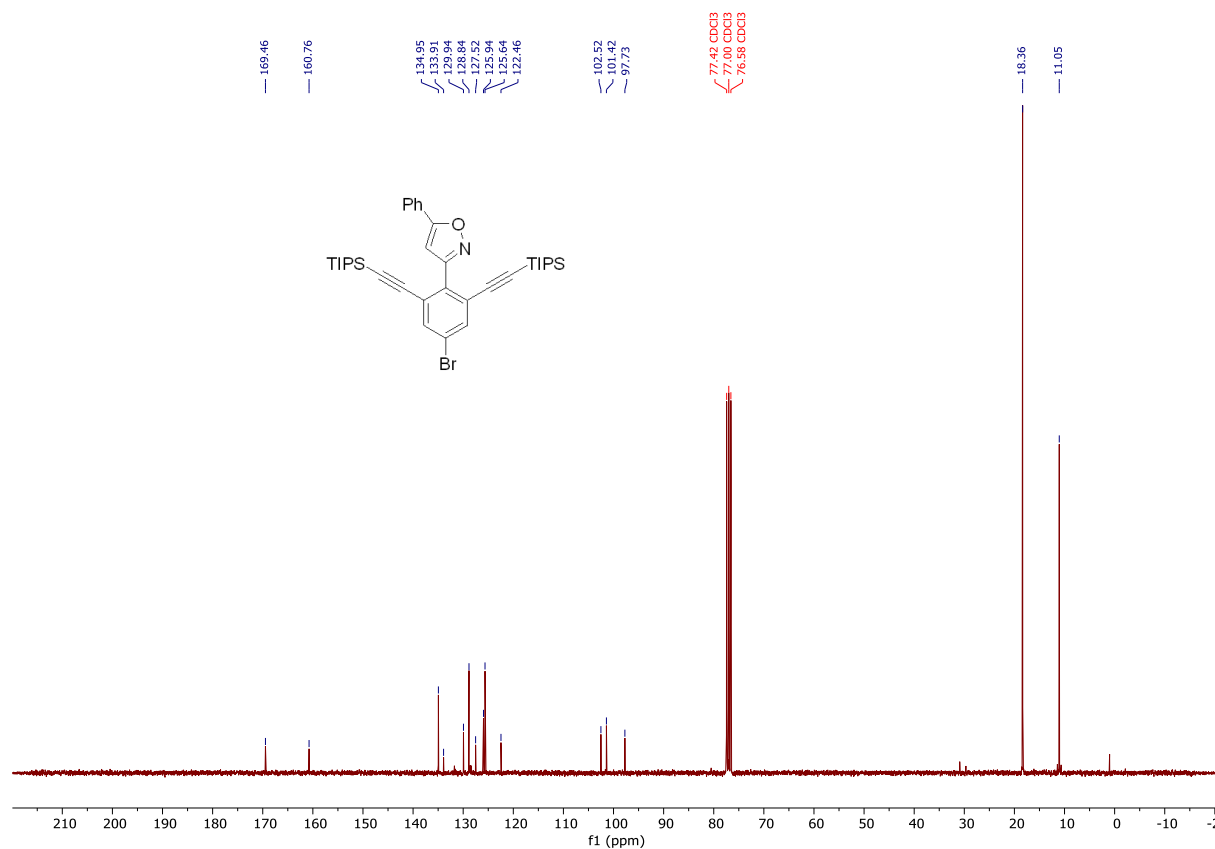

**3-(4-iodo-2,6-bis((triisopropylsilyl)ethynyl)phenyl)-5-phenylisoxazole (3i)**  
**<sup>1</sup>H NMR (300 MHz, CDCl<sub>3</sub>)**

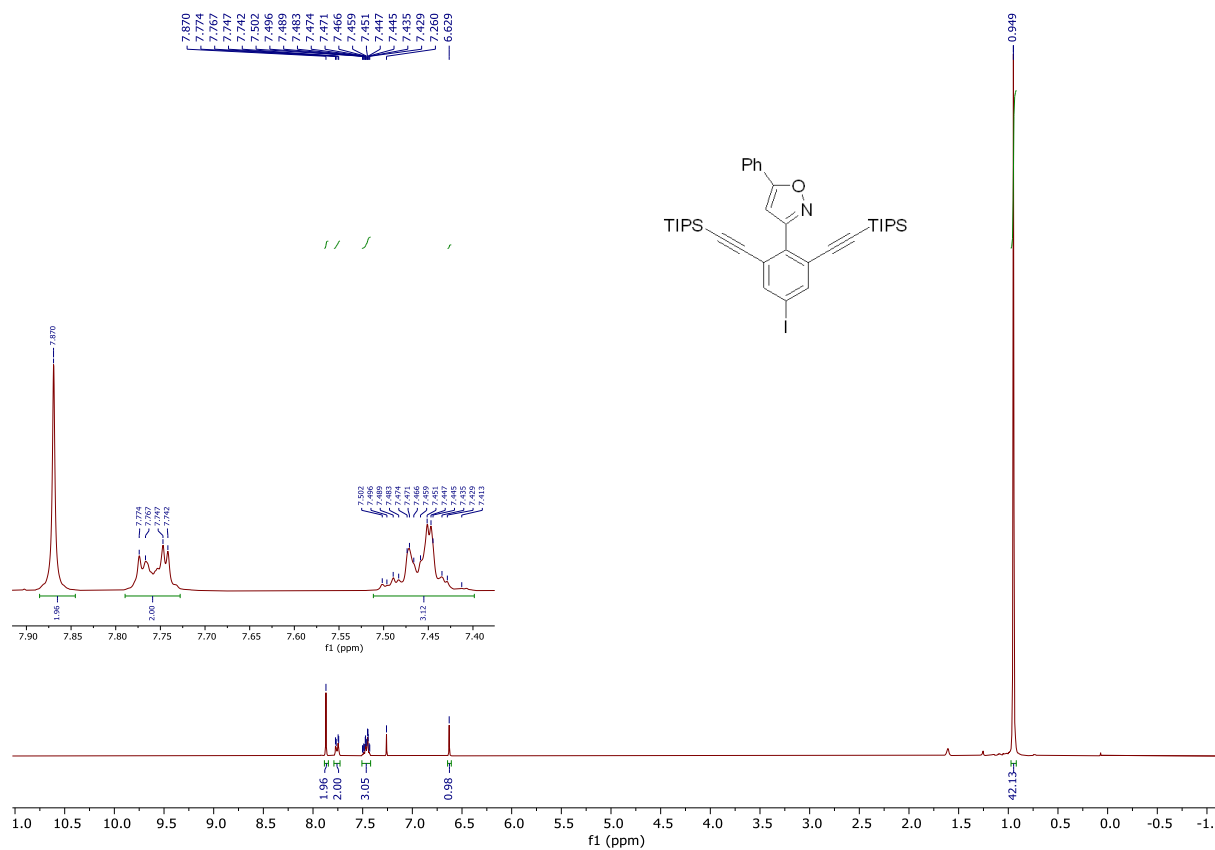

**<sup>13</sup>C NMR (101 MHz, CDCl<sub>3</sub>)**

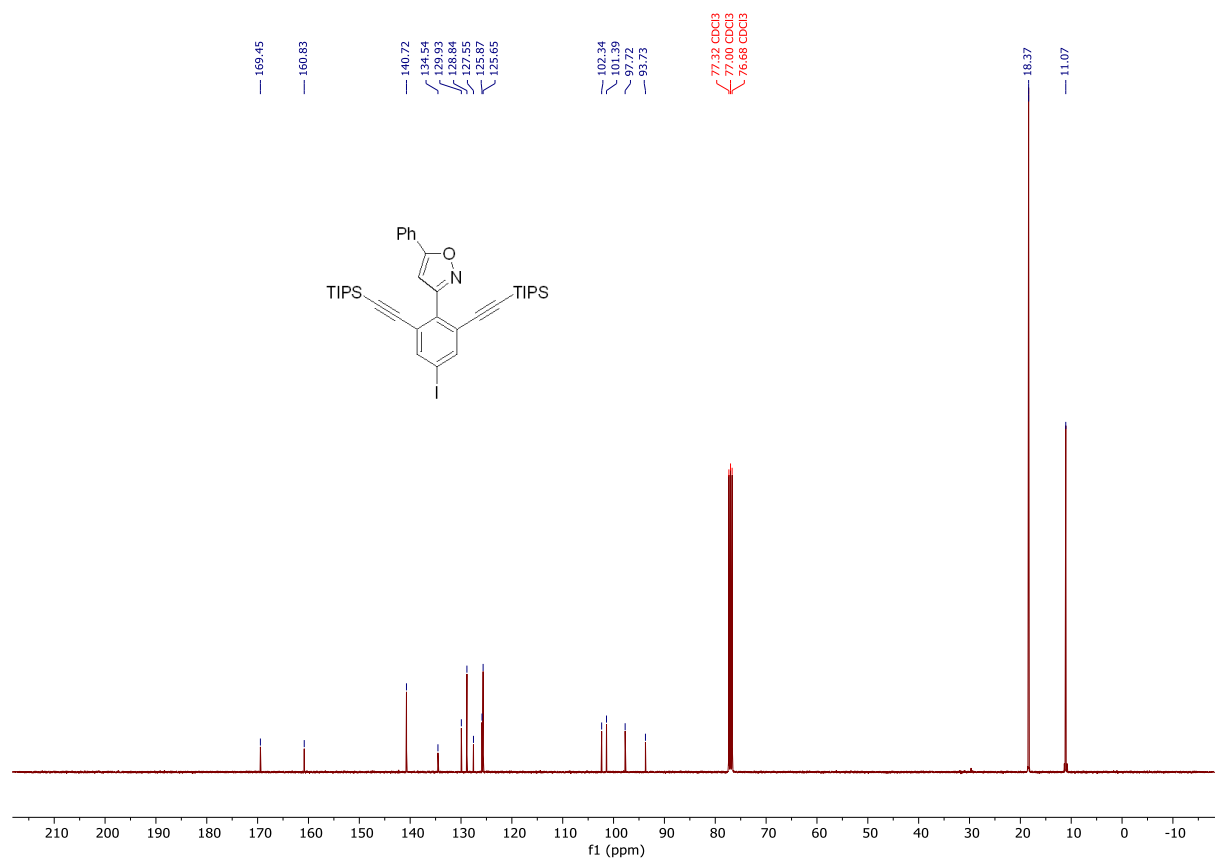

### 3-(4-nitro-2,6-bis((triisopropylsilyl)ethynyl)phenyl)-5-phenylisoxazole (3)

<sup>1</sup>H NMR (300 MHz, CDCl<sub>3</sub>)

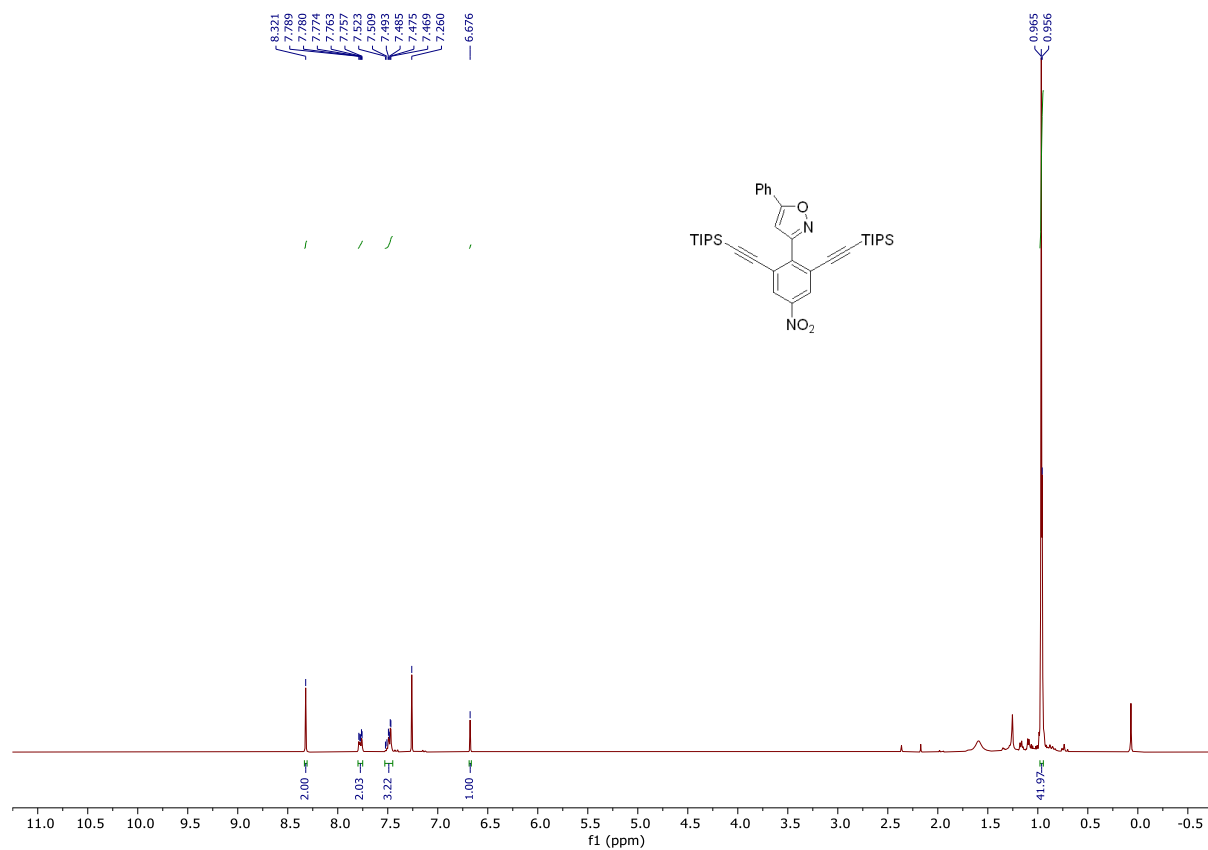

<sup>13</sup>C NMR (75 MHz, CDCl<sub>3</sub>)

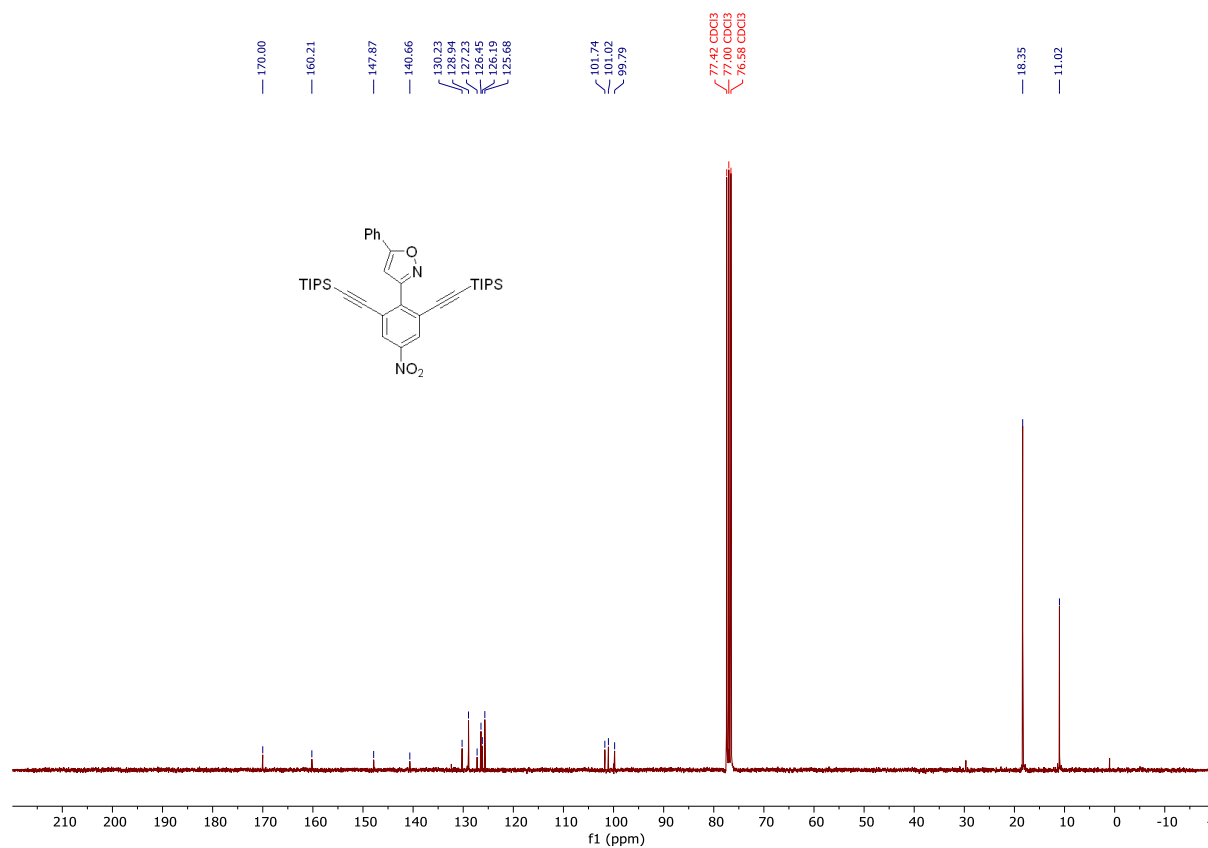

**3-(5-nitro-2-((triisopropylsilyl)ethynyl)phenyl)-5-phenylisoxazole (4k)**  
**3-(3-nitro-2,6-bis((triisopropylsilyl)ethynyl)phenyl)-5-phenylisoxazole (3k)**  
<sup>1</sup>H NMR (300 MHz, CDCl<sub>3</sub>)

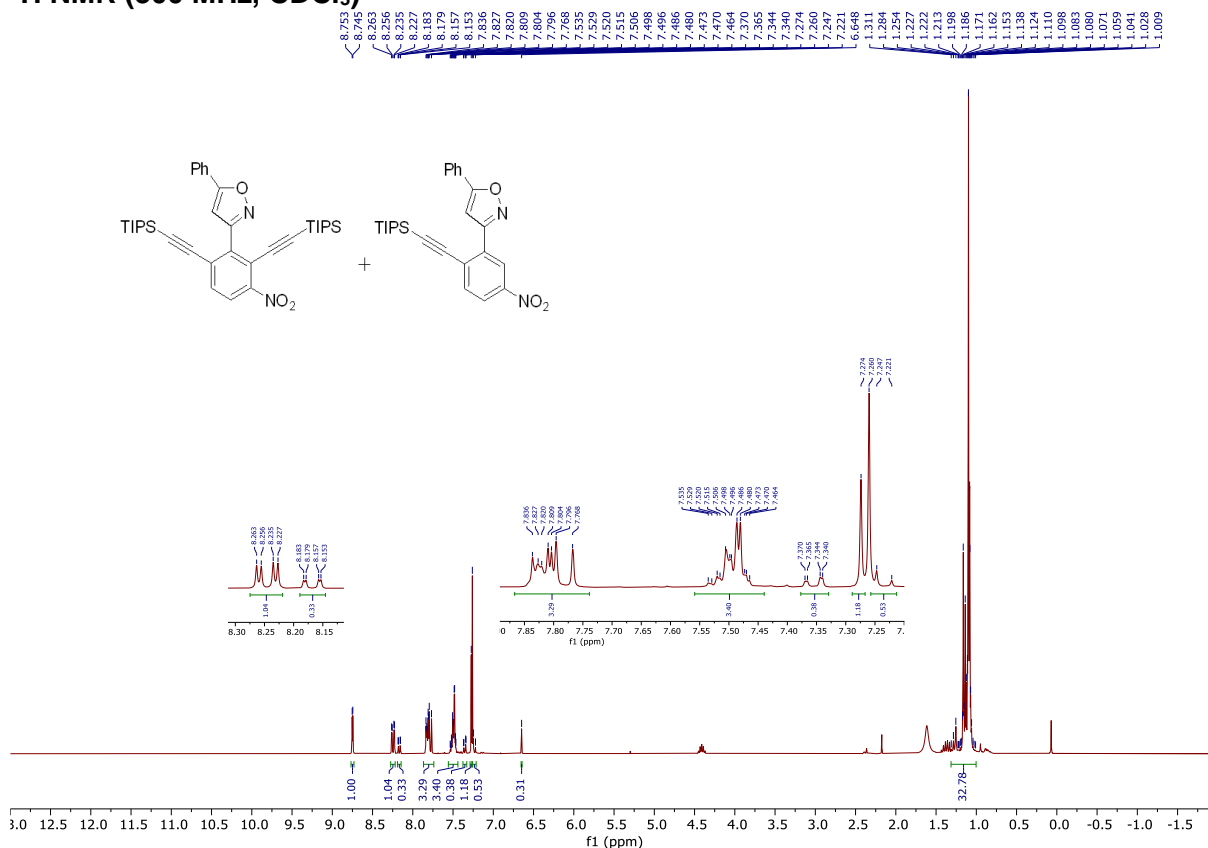

<sup>13</sup>C NMR (75 MHz, CDCl<sub>3</sub>)

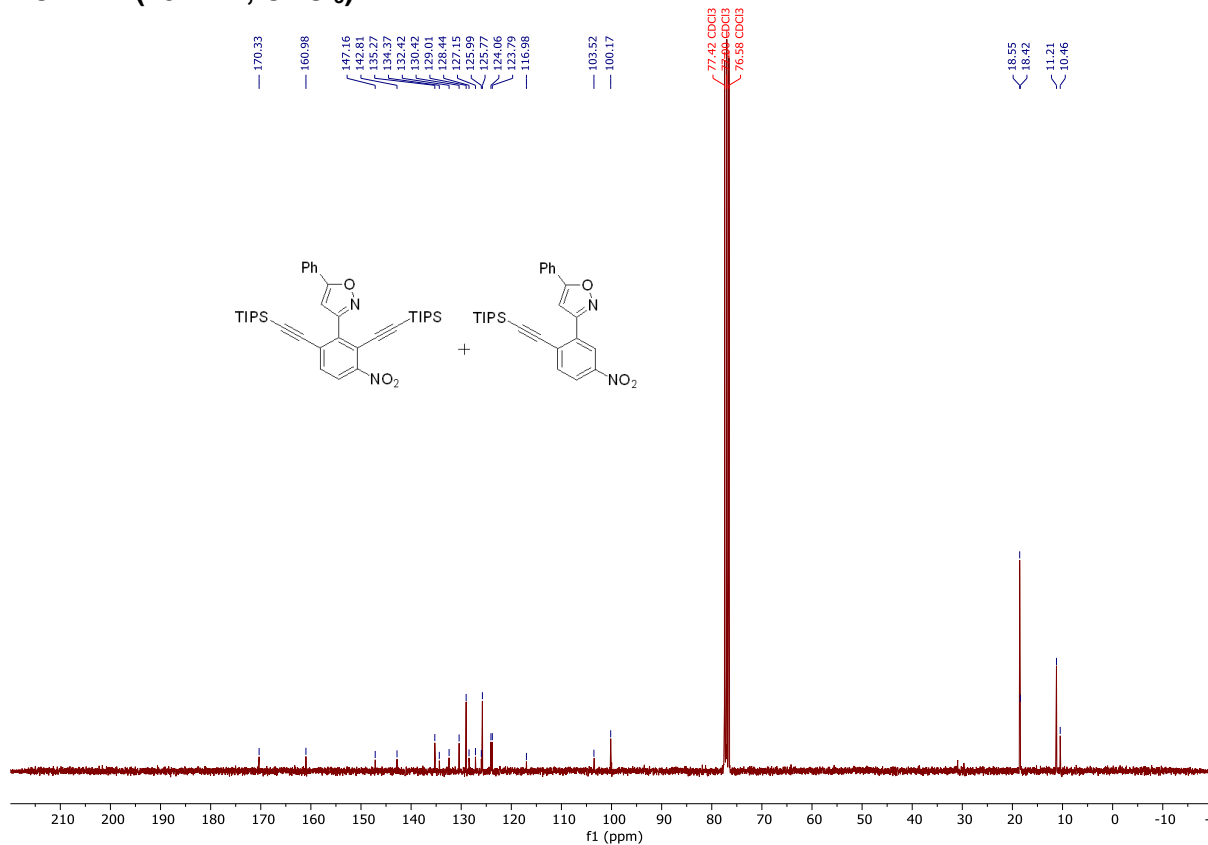

# 5-phenyl-3-(3-((triisopropylsilyl)ethynyl)naphthalen-2-yl)isoxazole (4)

<sup>1</sup>H NMR (300 MHz, CDCl<sub>3</sub>)

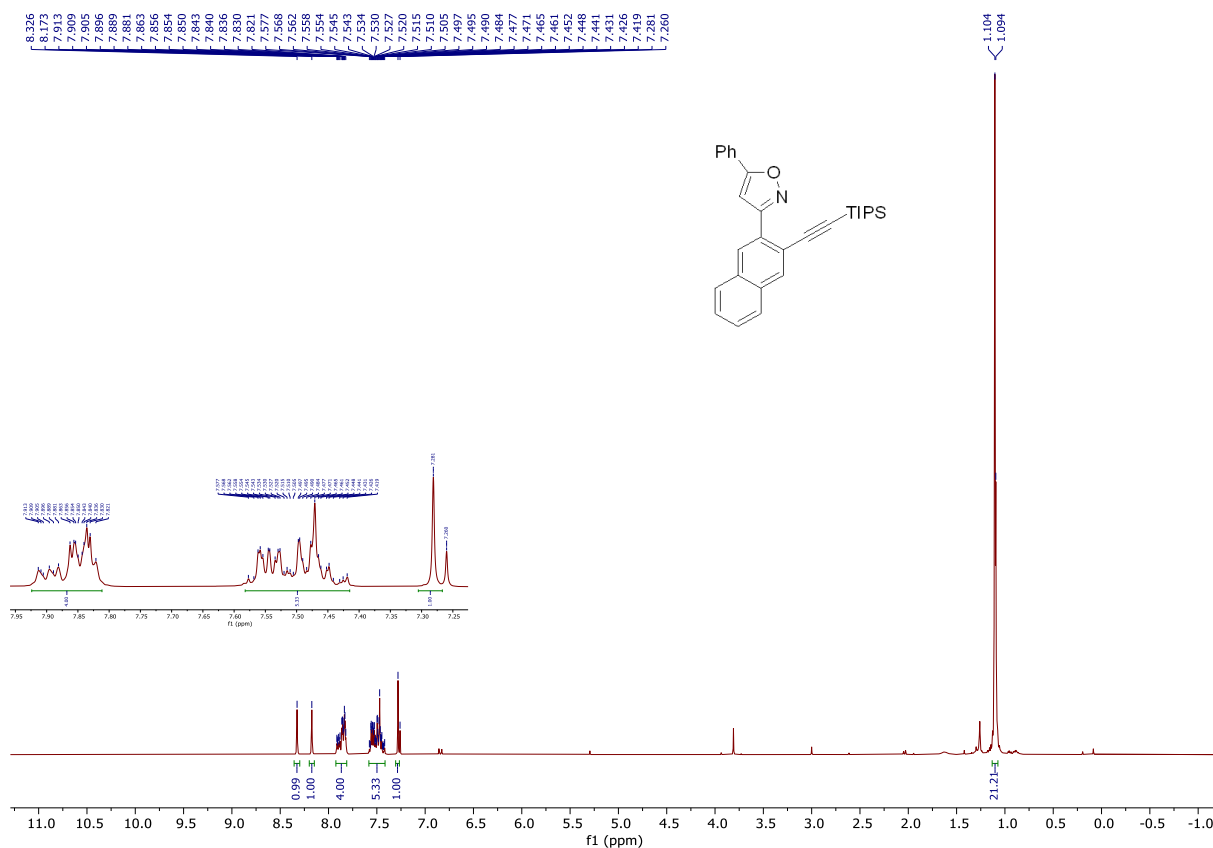

<sup>13</sup>C NMR (75 MHz, CDCl<sub>3</sub>)

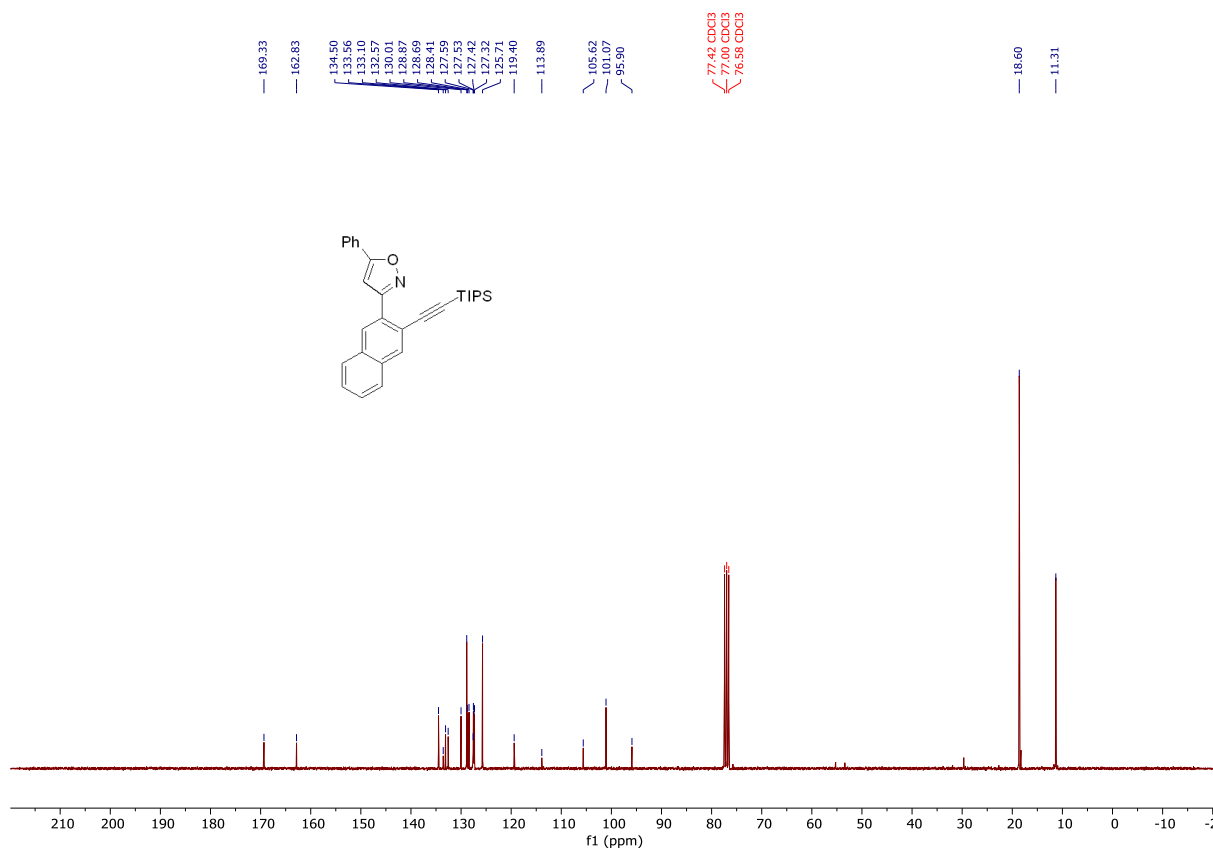



### 3-(4,5-dimethoxy-2-((triisopropylsilyl)ethynyl)phenyl)-5-phenylisoxazole (4m)

<sup>1</sup>H NMR (300 MHz, CDCl<sub>3</sub>)

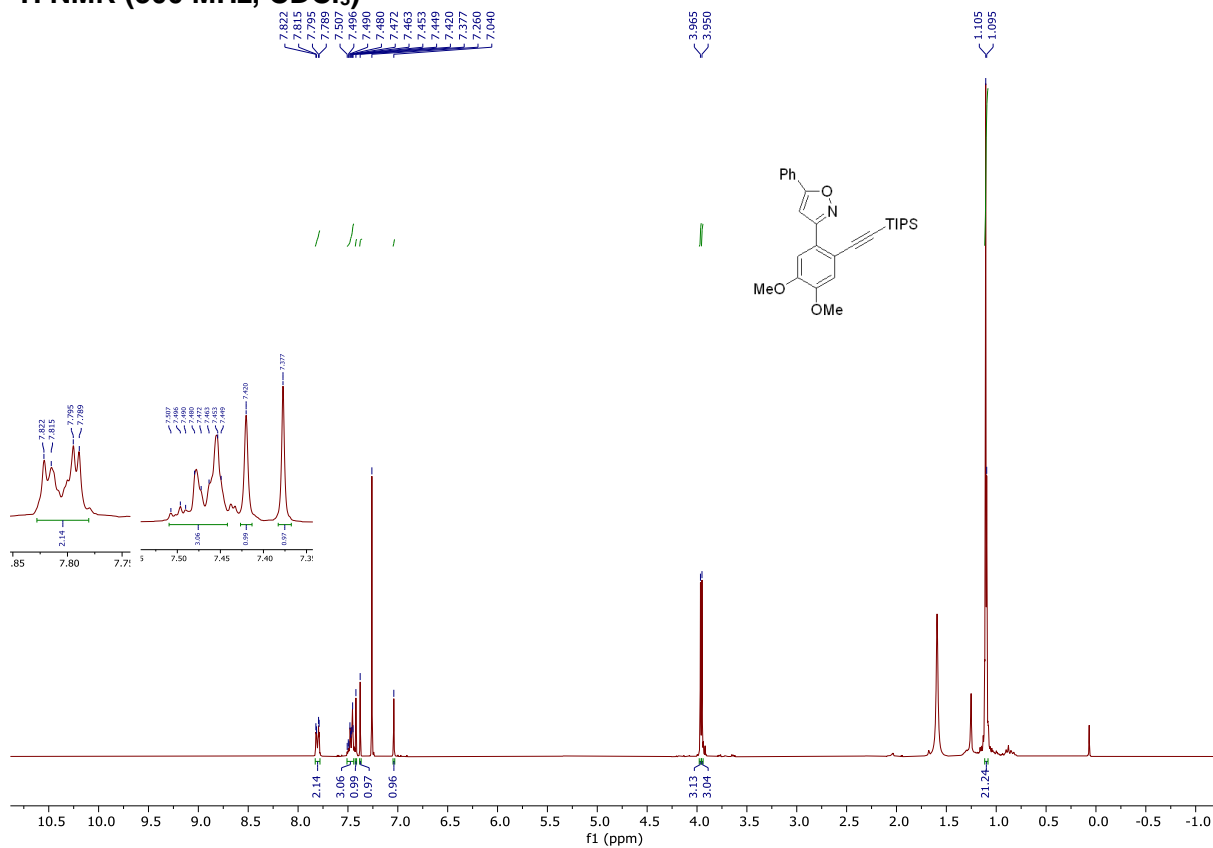

<sup>13</sup>C NMR (101 MHz, CDCl<sub>3</sub>)

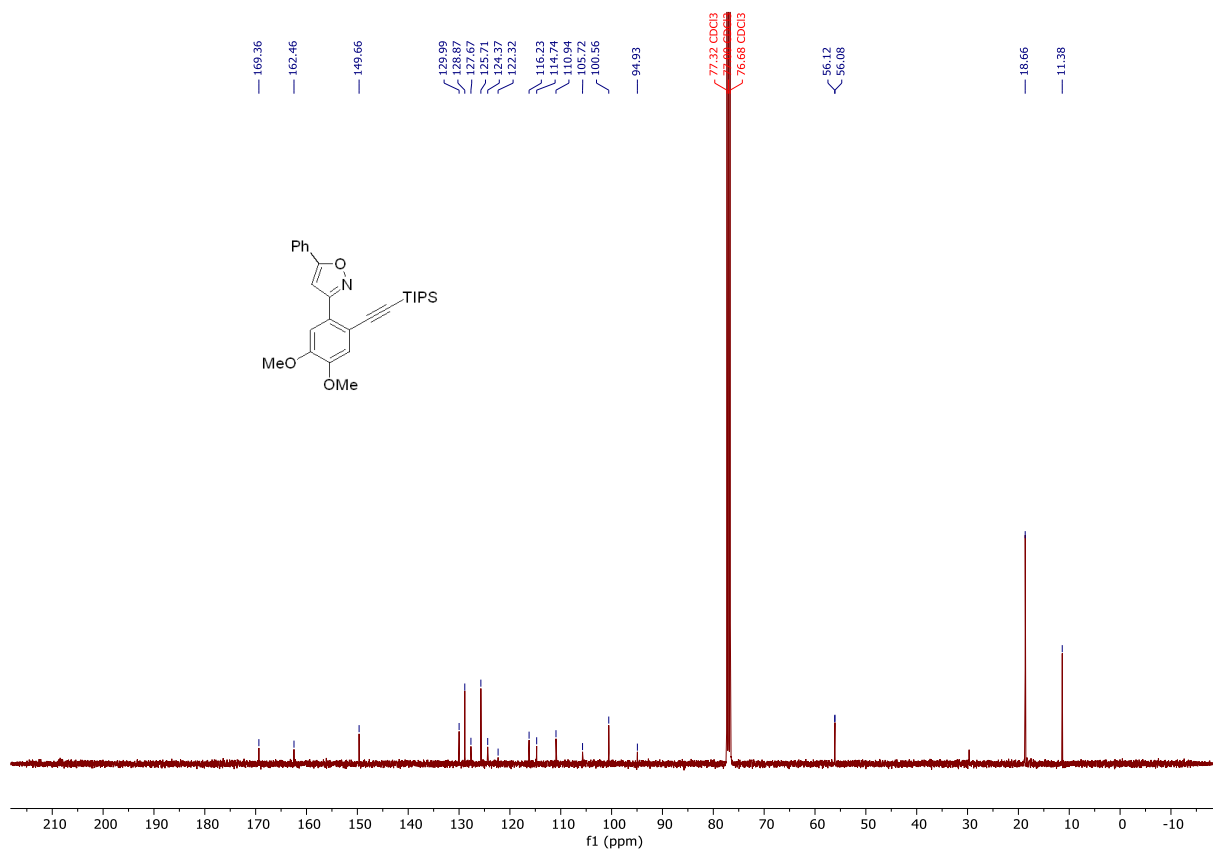

**3-(2-methyl-6-((triisopropylsilyl)ethynyl)phenyl)-5-phenylisoxazole (4n)**  
<sup>1</sup>H NMR (300 MHz, CDCl<sub>3</sub>)

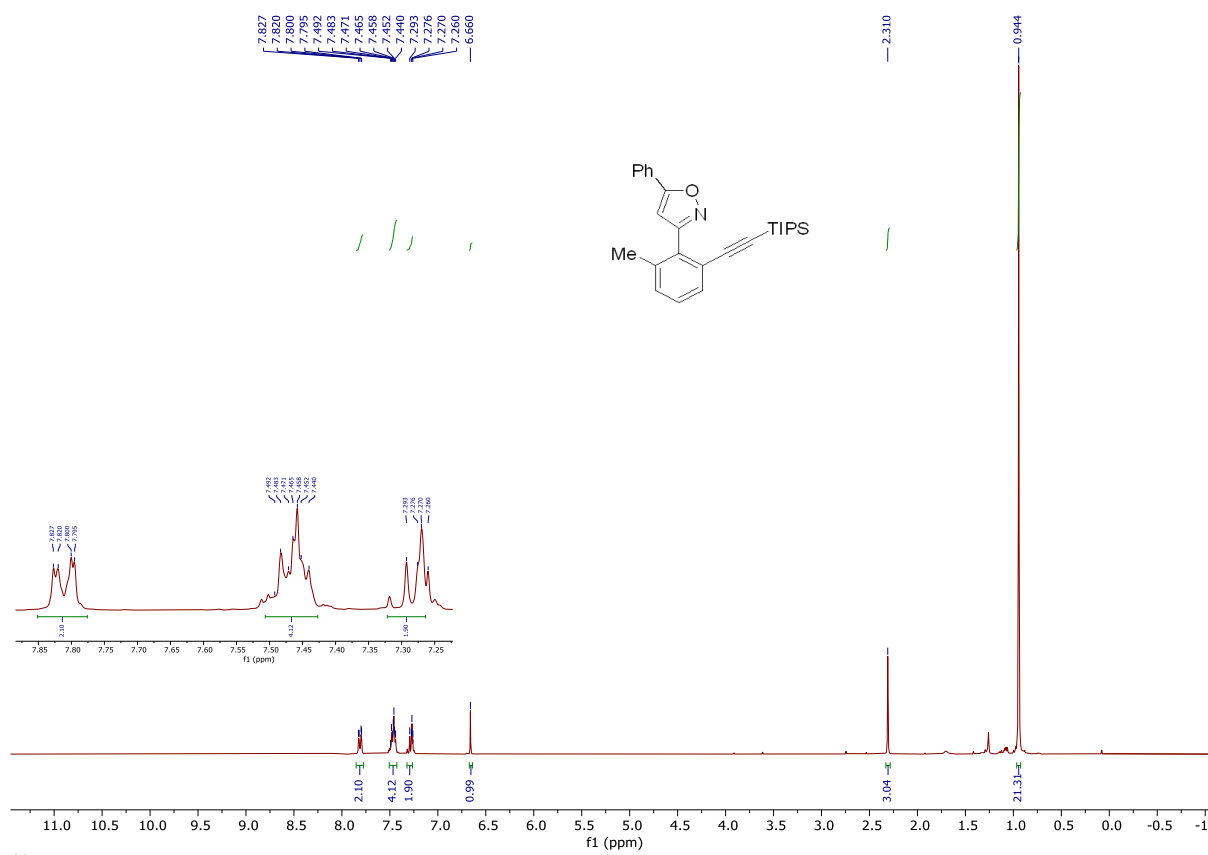

**<sup>13</sup>C NMR (101 MHz, CDCl<sub>3</sub>)**

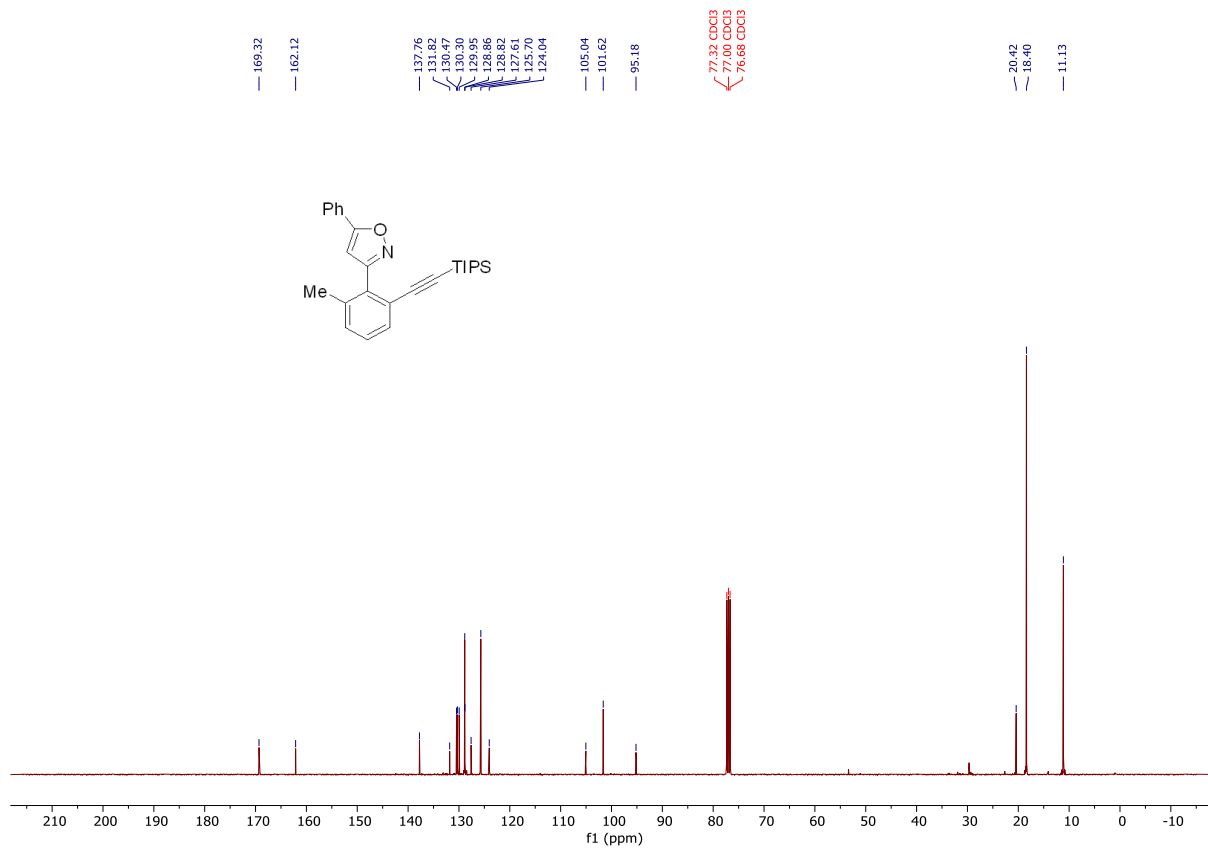

**3-(2-chloro-6-((triisopropylsilyl)ethynyl)phenyl)-5-phenylisoxazole (4o)**  
**<sup>1</sup>H NMR (400 MHz, CDCl<sub>3</sub>)**

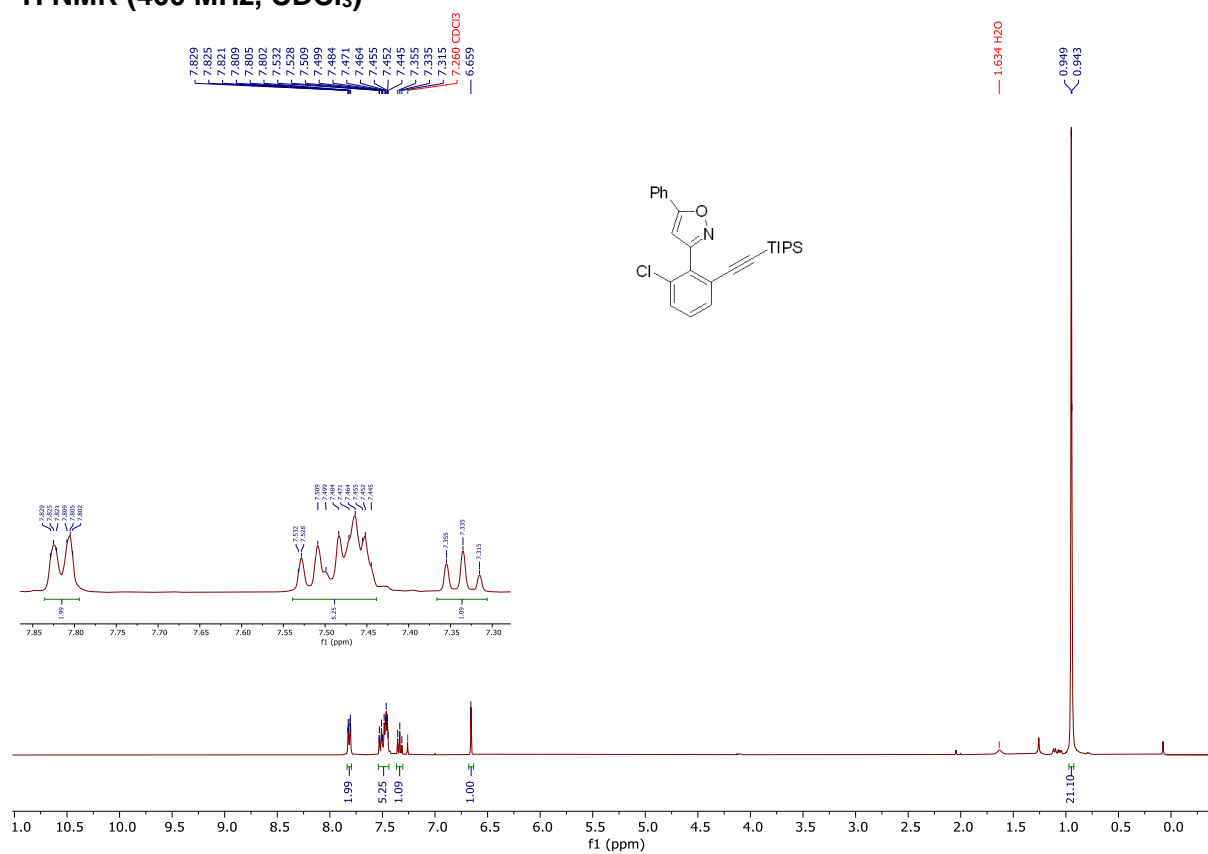

**<sup>13</sup>C NMR (75 MHz, CDCl<sub>3</sub>)**

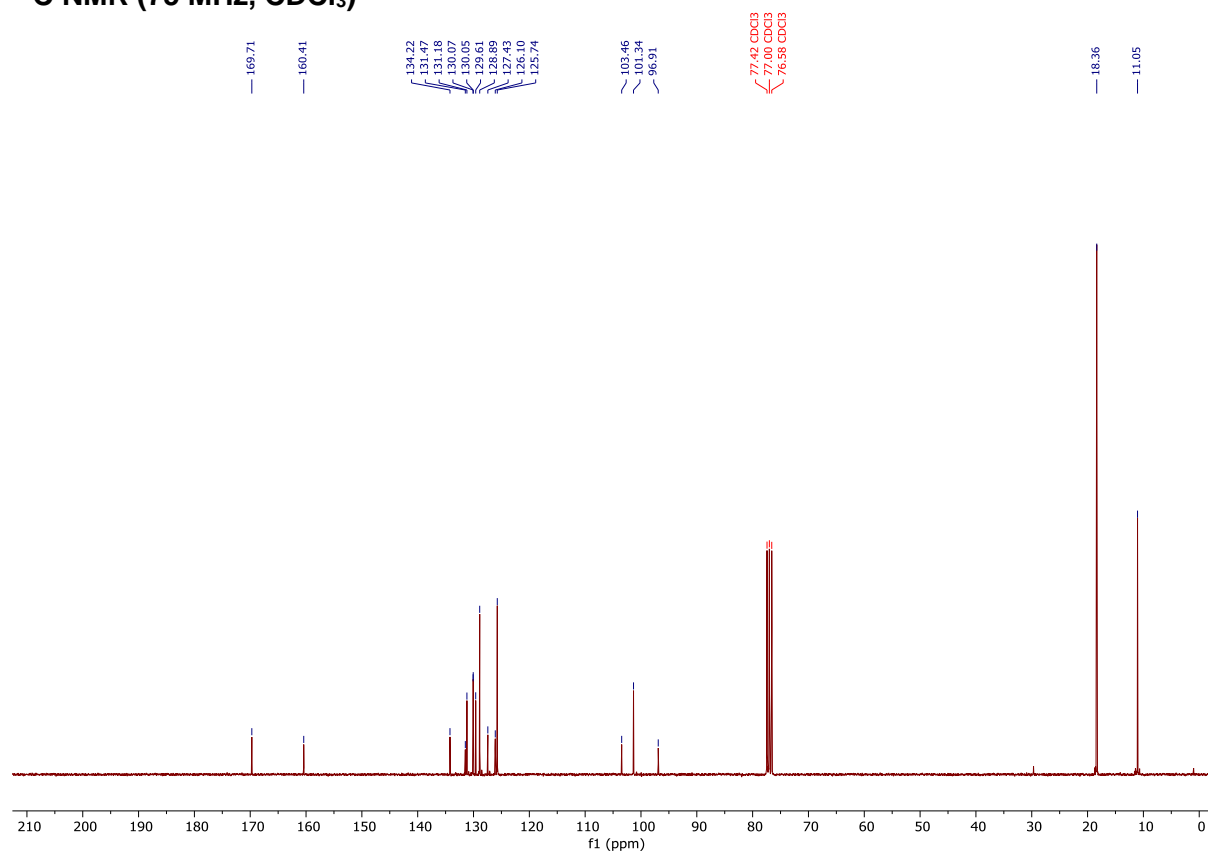

### 3-(6-bromo-3-fluoro-2-((triisopropylsilyl)ethynyl)phenyl)-5-phenylisoxazole (4p)

$^1\text{H}$  NMR (300 MHz,  $\text{CDCl}_3$ )

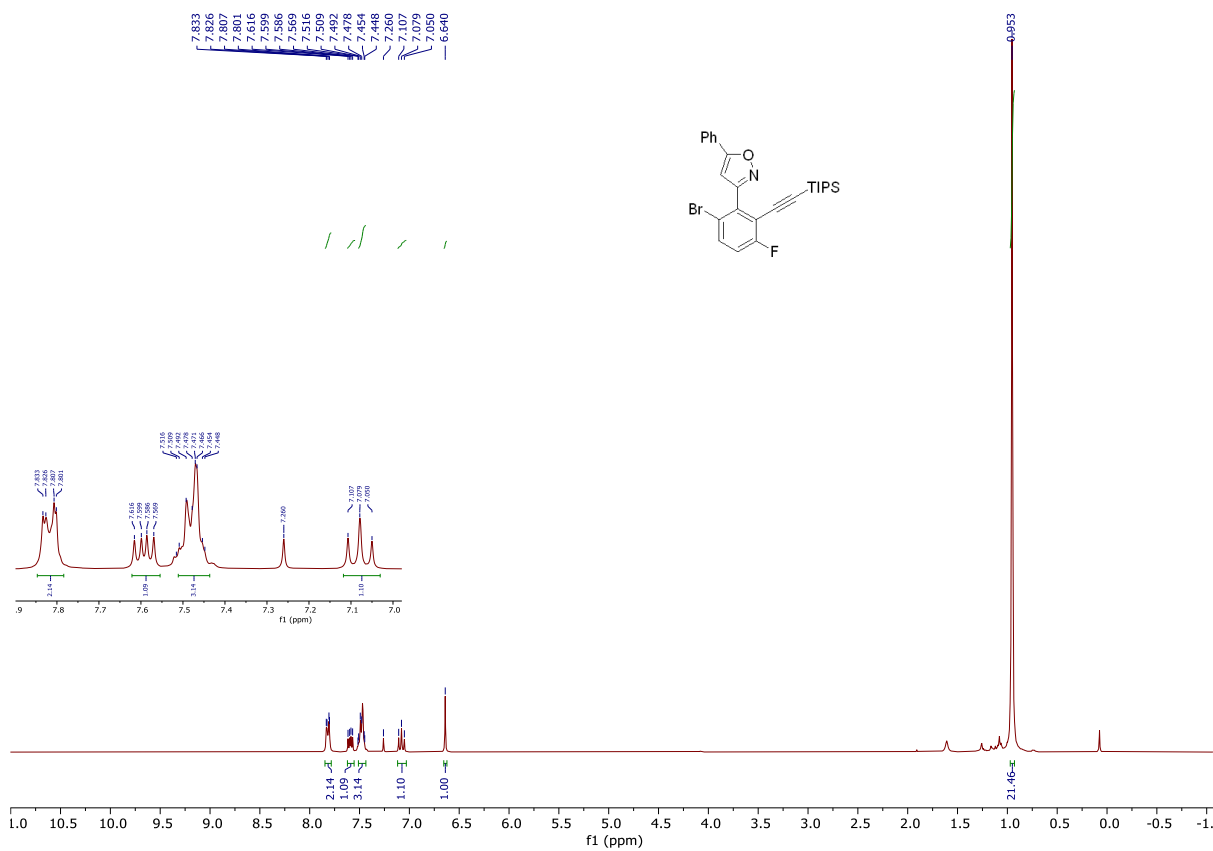

$^{13}\text{C}$  NMR (75 MHz,  $\text{CDCl}_3$ )

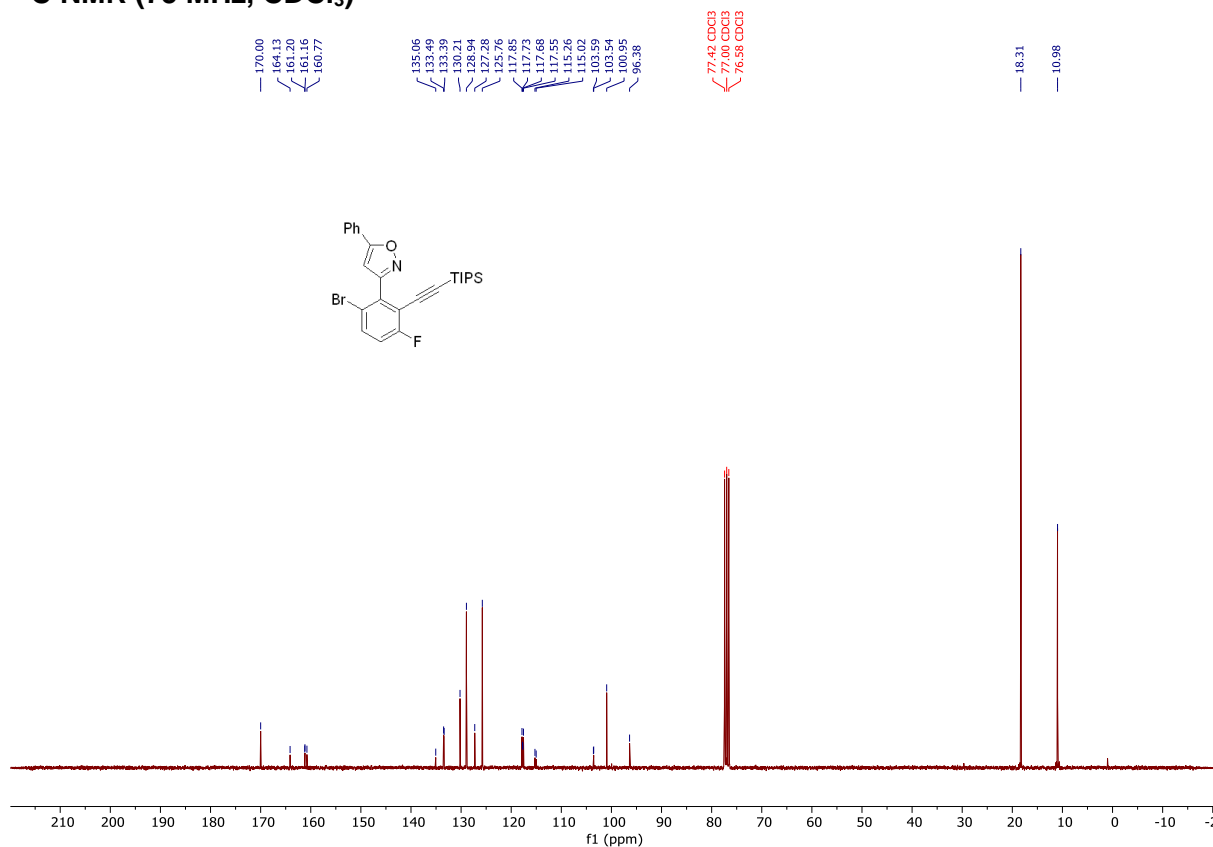

# 5-phenyl-3-(3-((triisopropylsilyl)ethynyl)thiophen-2-yl)isoxazole (4s)

<sup>1</sup>H NMR (400 MHz, CDCl<sub>3</sub>)

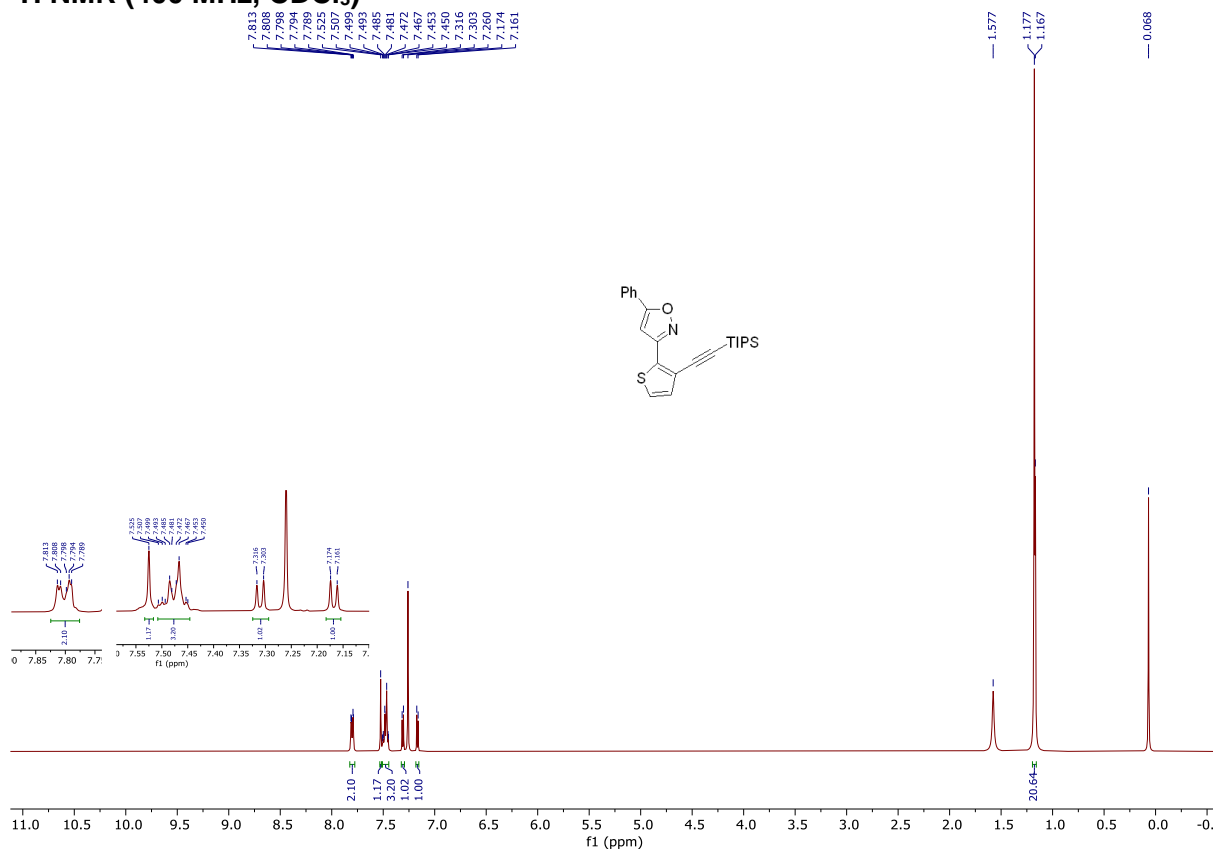

<sup>13</sup>C NMR (101 MHz, CDCl<sub>3</sub>)

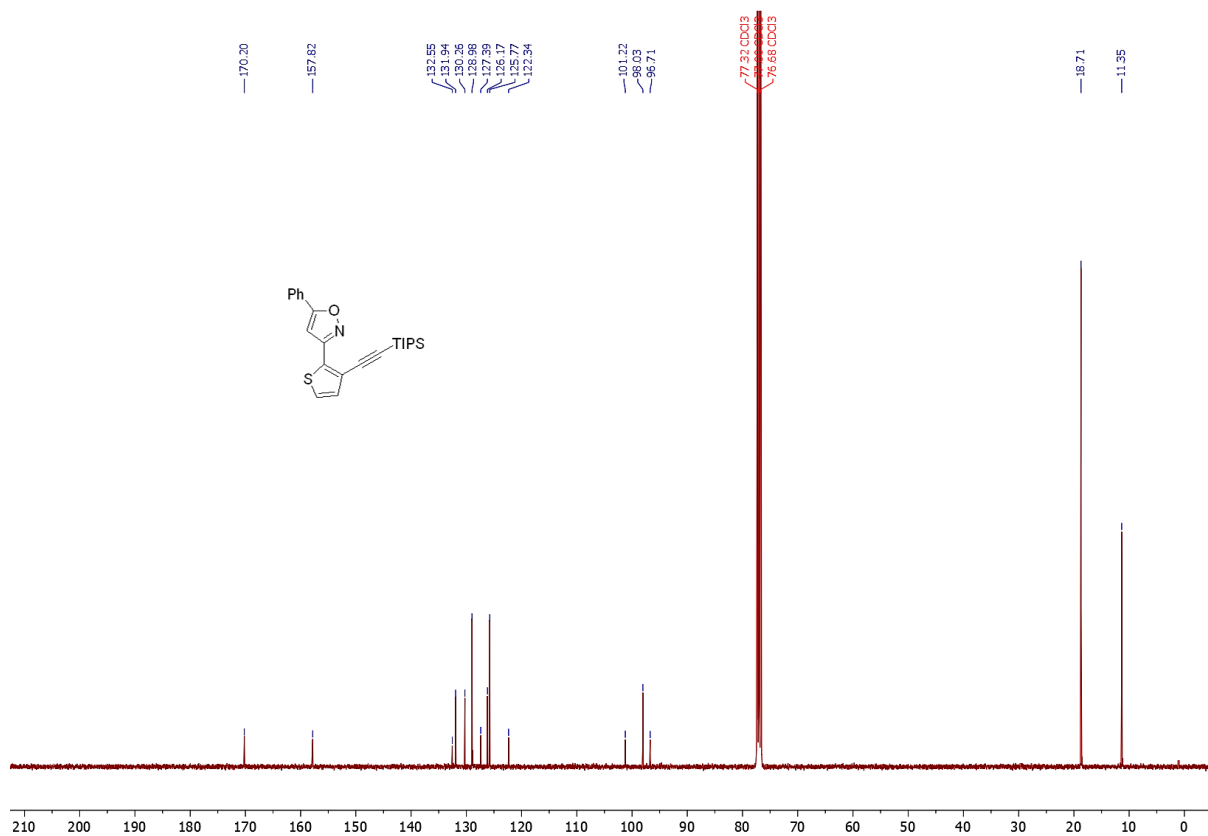

**3-(1-methyl-2-((triisopropylsilyl)ethynyl)-1H-indol-3-yl)-5-phenylisoxazole (4t)**  
<sup>1</sup>H NMR (300 MHz, CDCl<sub>3</sub>)

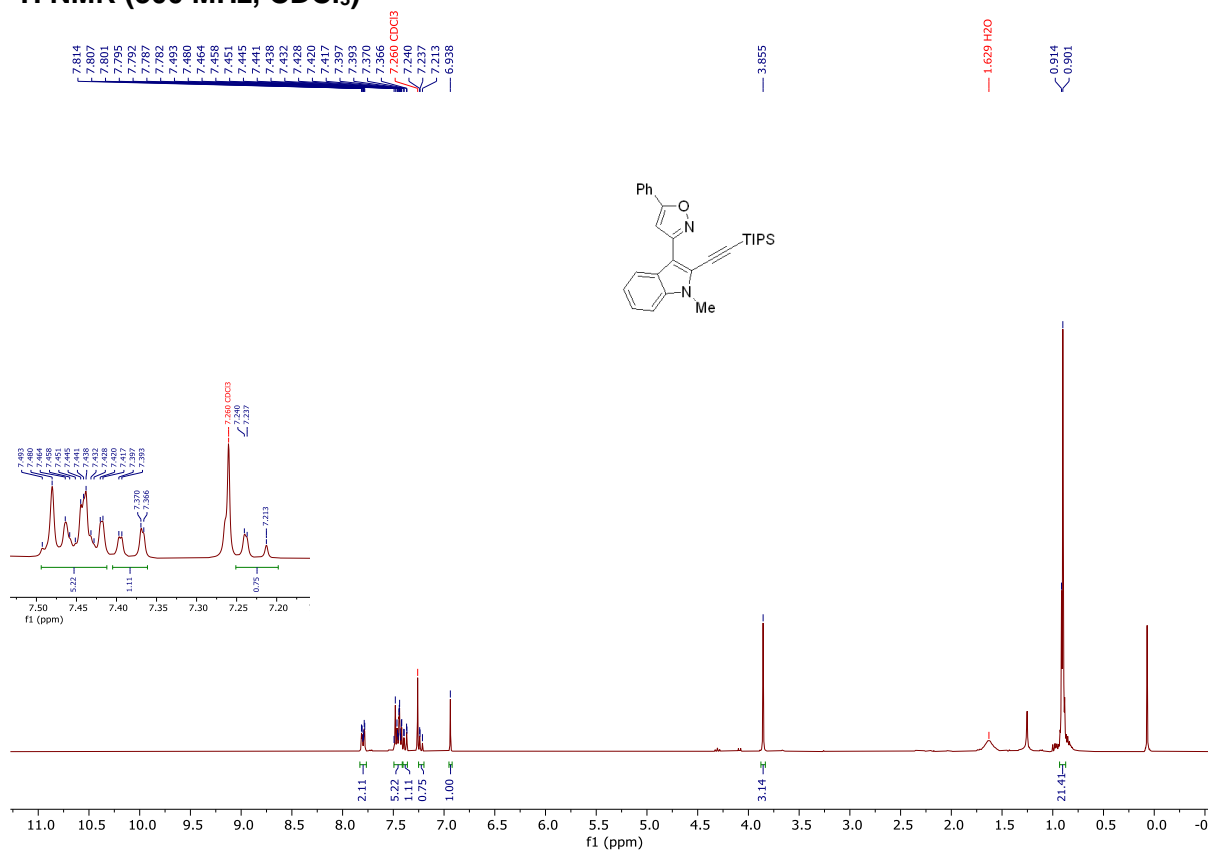

<sup>13</sup>C NMR (75 MHz, CDCl<sub>3</sub>)

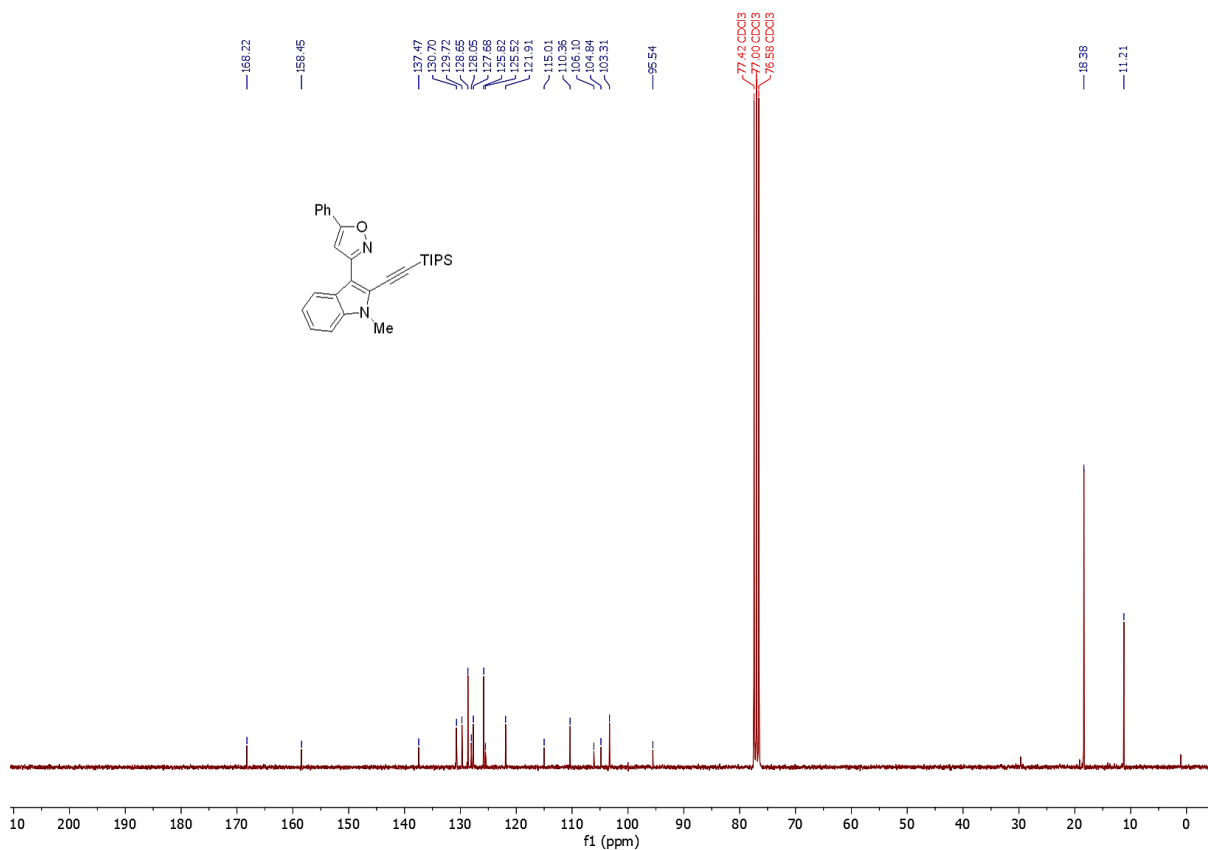

**ethyl 3-(4-bromo-2,6-bis((triisopropylsilyl)ethynyl)phenyl)-4,5-dihydroisoxazole-5-carboxylate (3u)**

**<sup>1</sup>H NMR (300 MHz, CDCl<sub>3</sub>)**

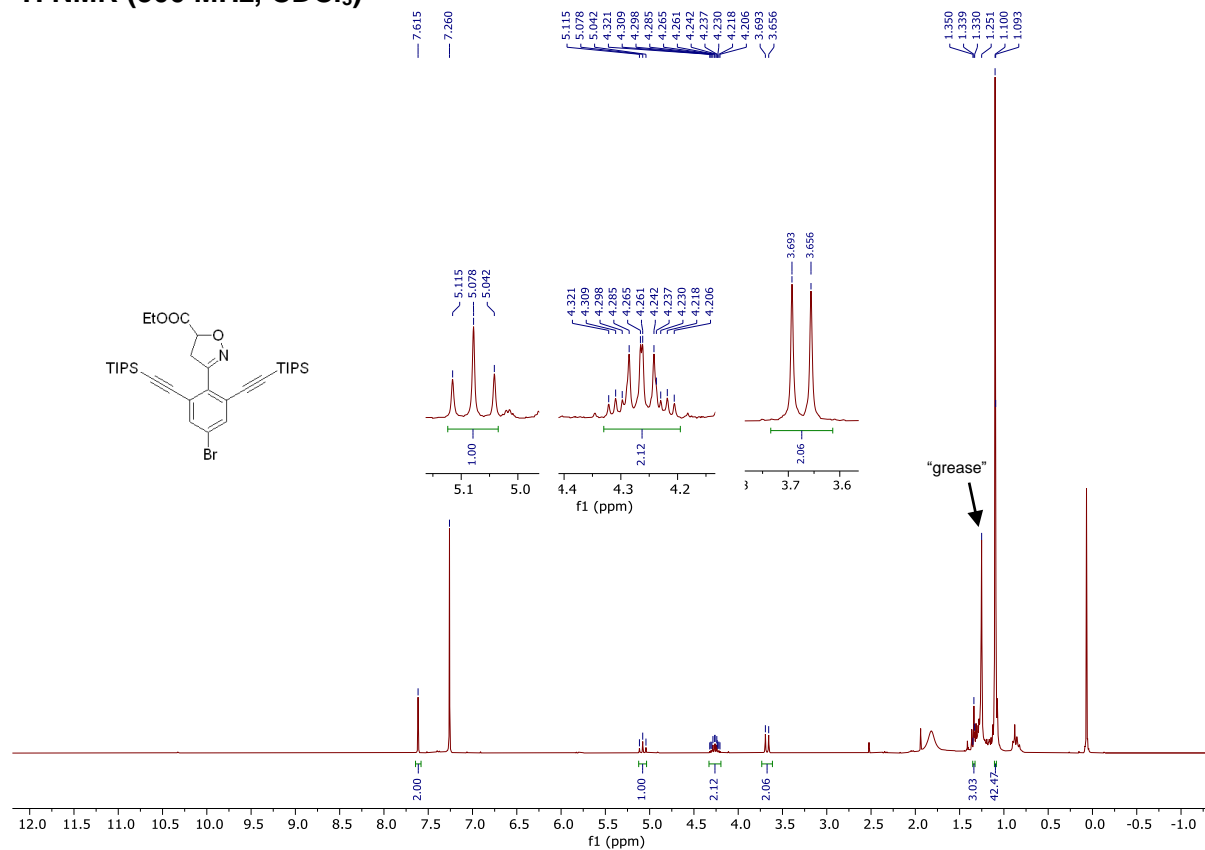

**<sup>13</sup>C NMR (101 MHz, CDCl<sub>3</sub>)**

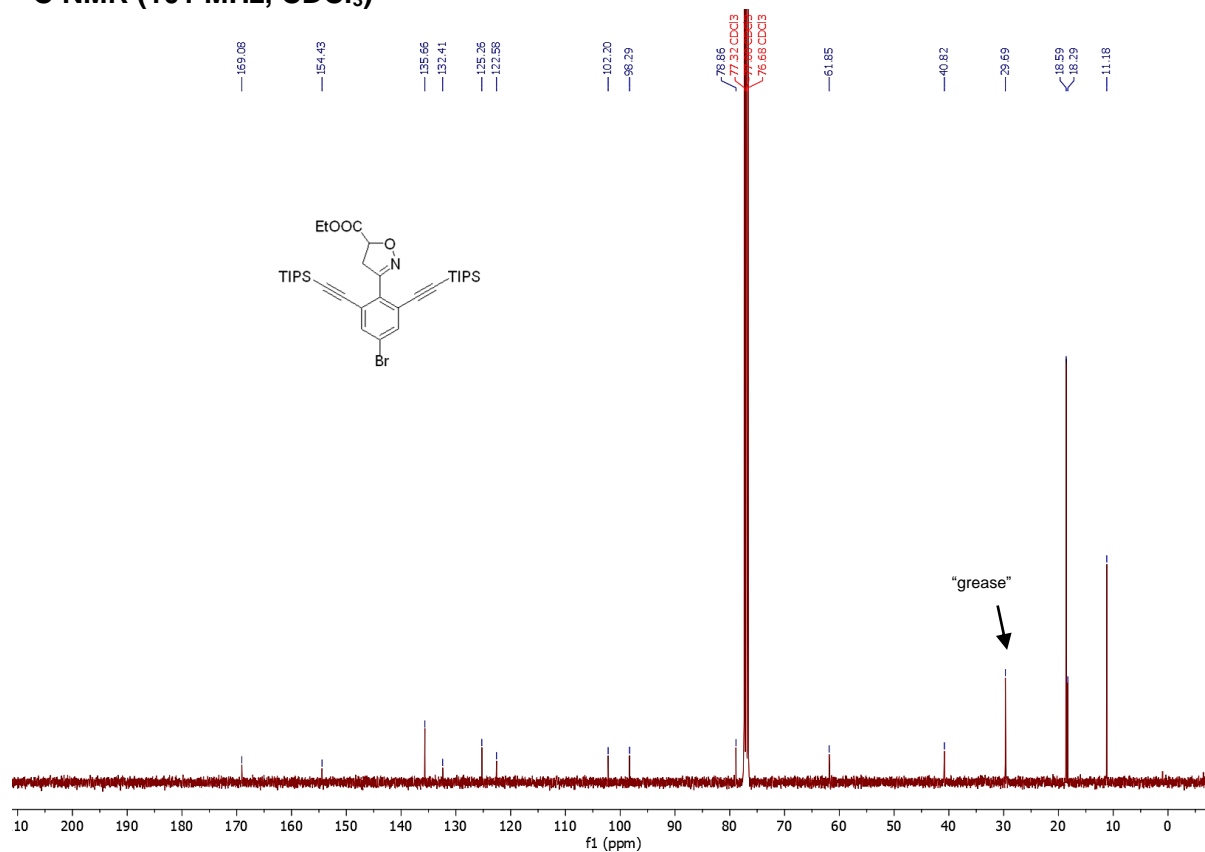

# 5-phenyl-3-(2-((triisopropylsilyl)ethynyl)phenyl)-4,5-dihydroisoxazole (4v)

<sup>1</sup>H NMR (300 MHz, CDCl<sub>3</sub>)

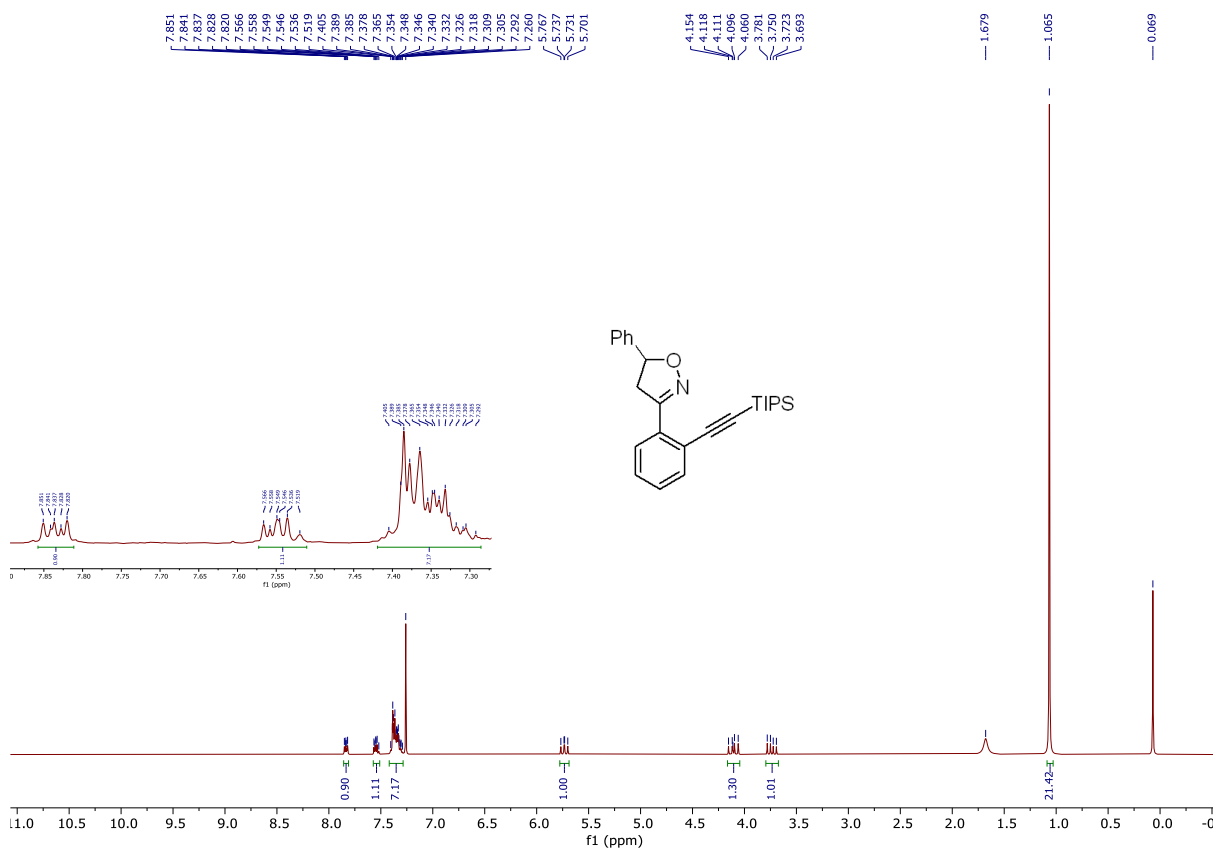

<sup>13</sup>C NMR (101 MHz, CDCl<sub>3</sub>)

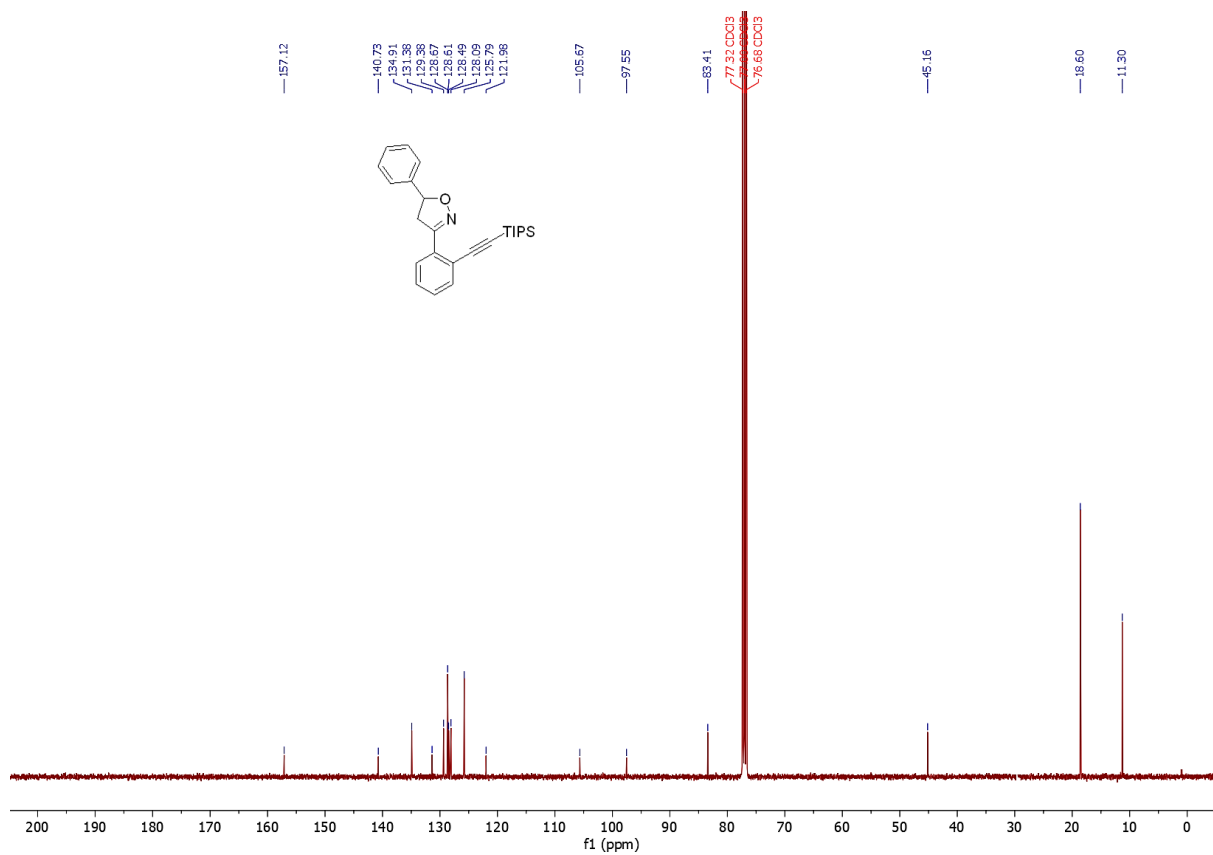



**3-(4-methoxy-2-((triisopropylsilyl)ethynyl)phenyl)-5-phenyl-4,5-dihydroisoxazole (4w)**  
**<sup>1</sup>H NMR (300 MHz, CDCl<sub>3</sub>)**

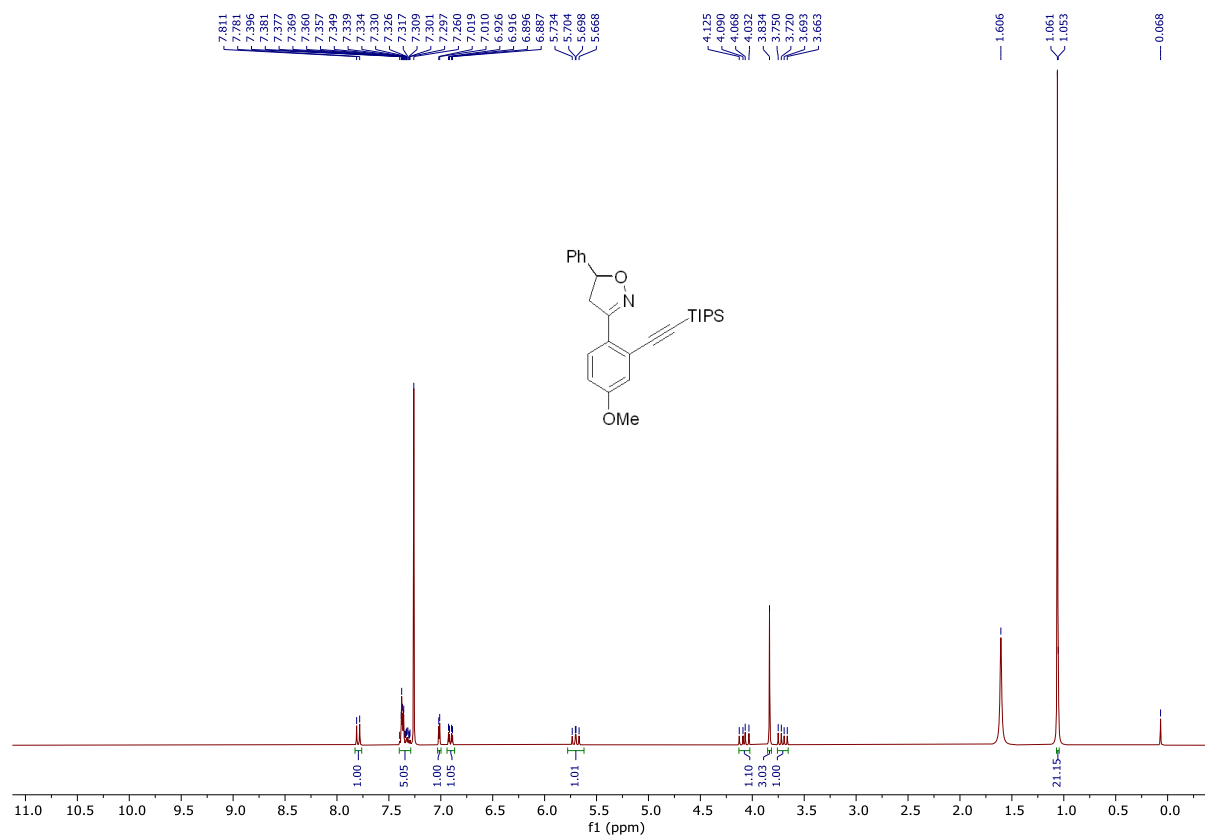

**<sup>13</sup>C NMR (101 MHz, CDCl<sub>3</sub>)**

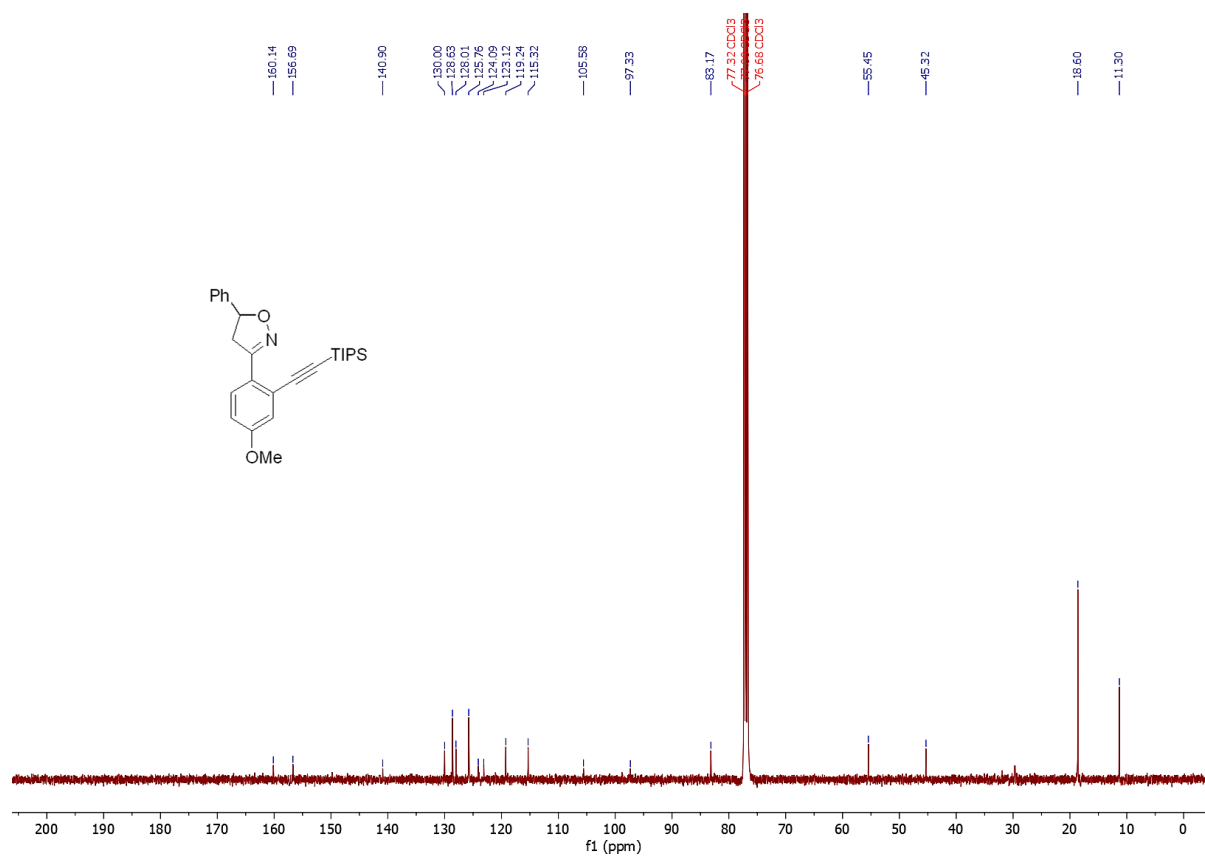

**5-(4-methoxyphenyl)-3-(2-methyl-6-((triisopropylsilyl)ethynyl)phenyl)isoxazole (4x)**  
<sup>1</sup>H NMR (300 MHz, CDCl<sub>3</sub>)

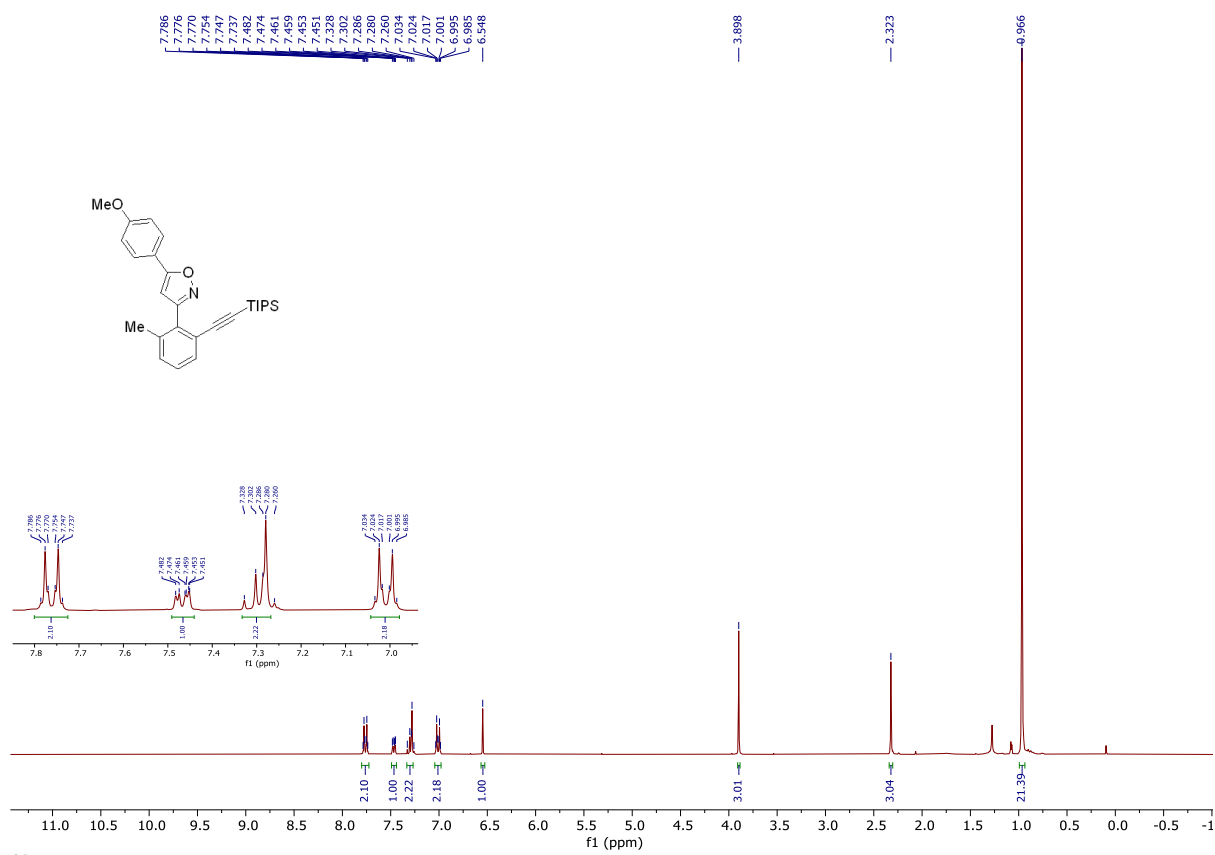

<sup>13</sup>C NMR (101 MHz, CDCl<sub>3</sub>)

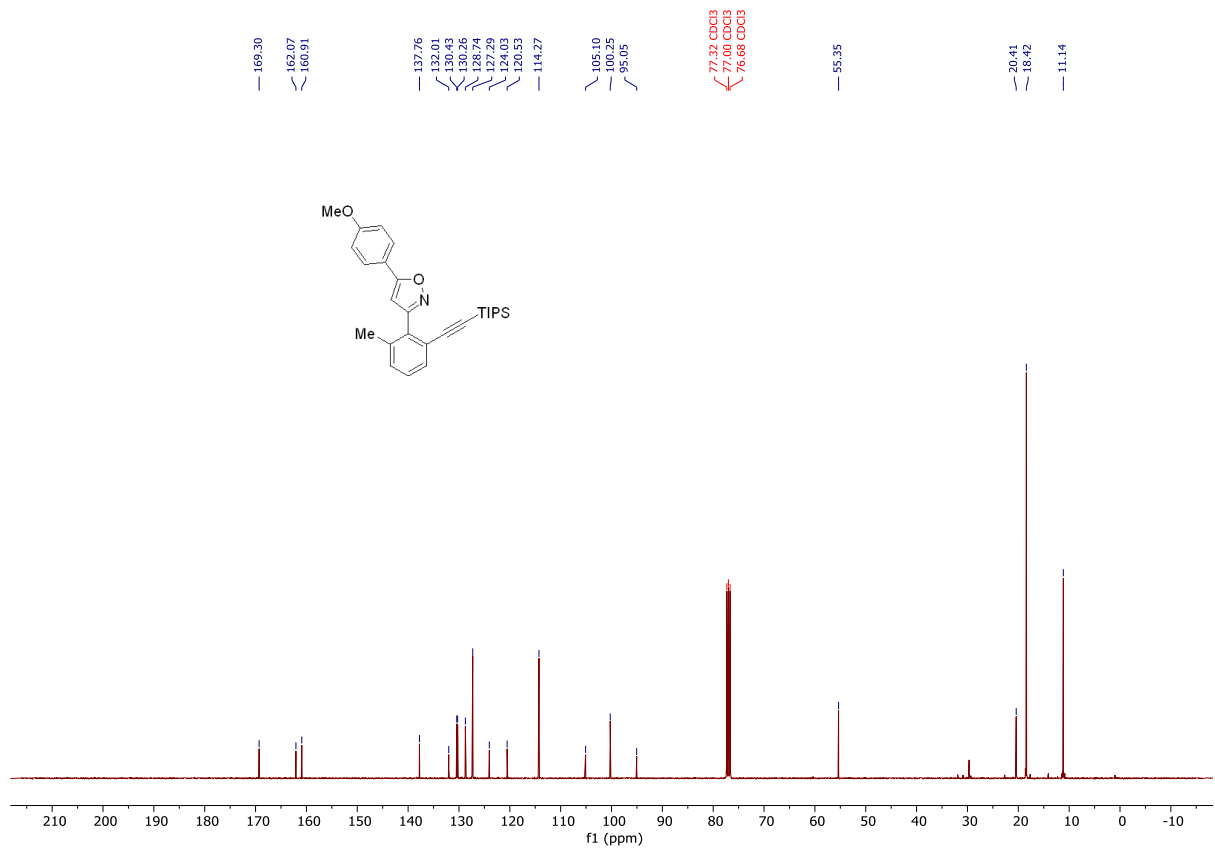

**3-(2-methyl-6-((triisopropylsilyl)ethynyl)phenyl)-5-(3-nitrophenyl)isoxazole (4y)**  
<sup>1</sup>H NMR (300 MHz, CDCl<sub>3</sub>)

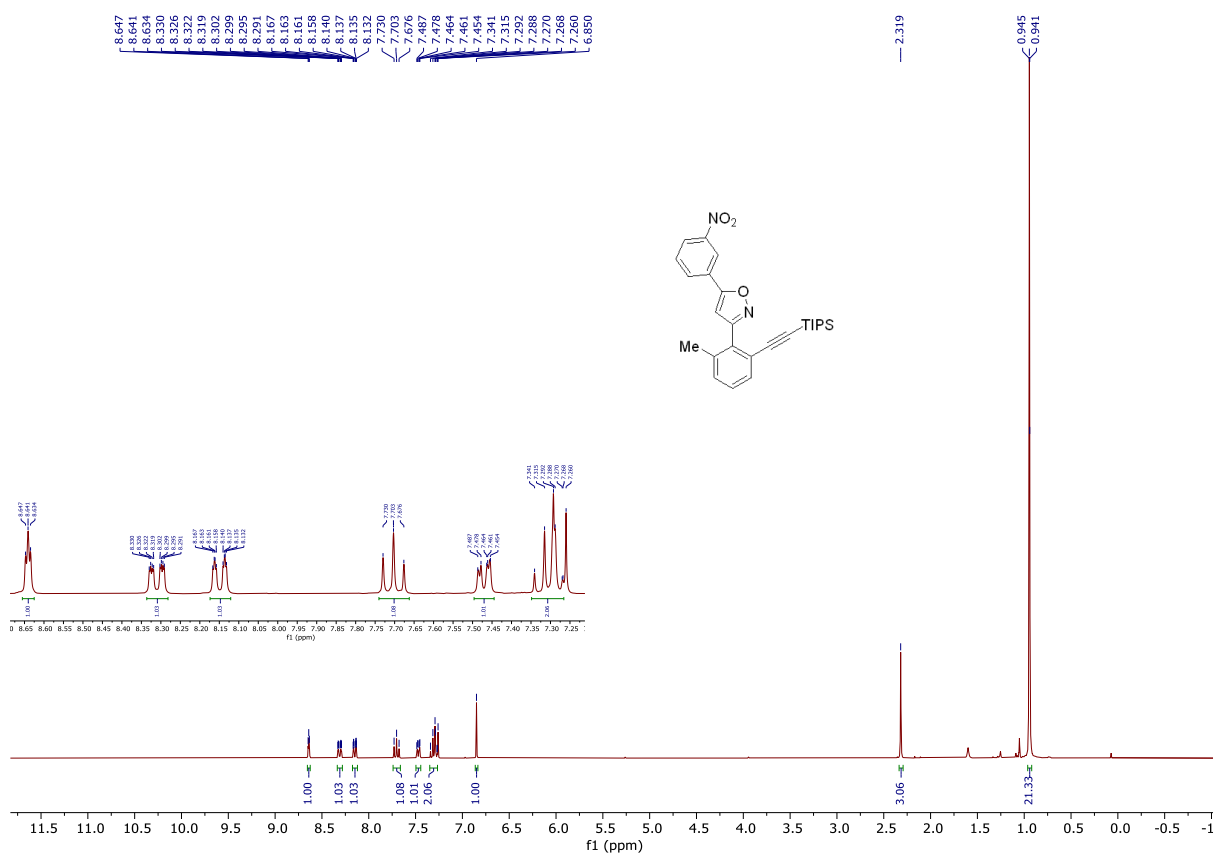

<sup>13</sup>C NMR (75 MHz, CDCl<sub>3</sub>)

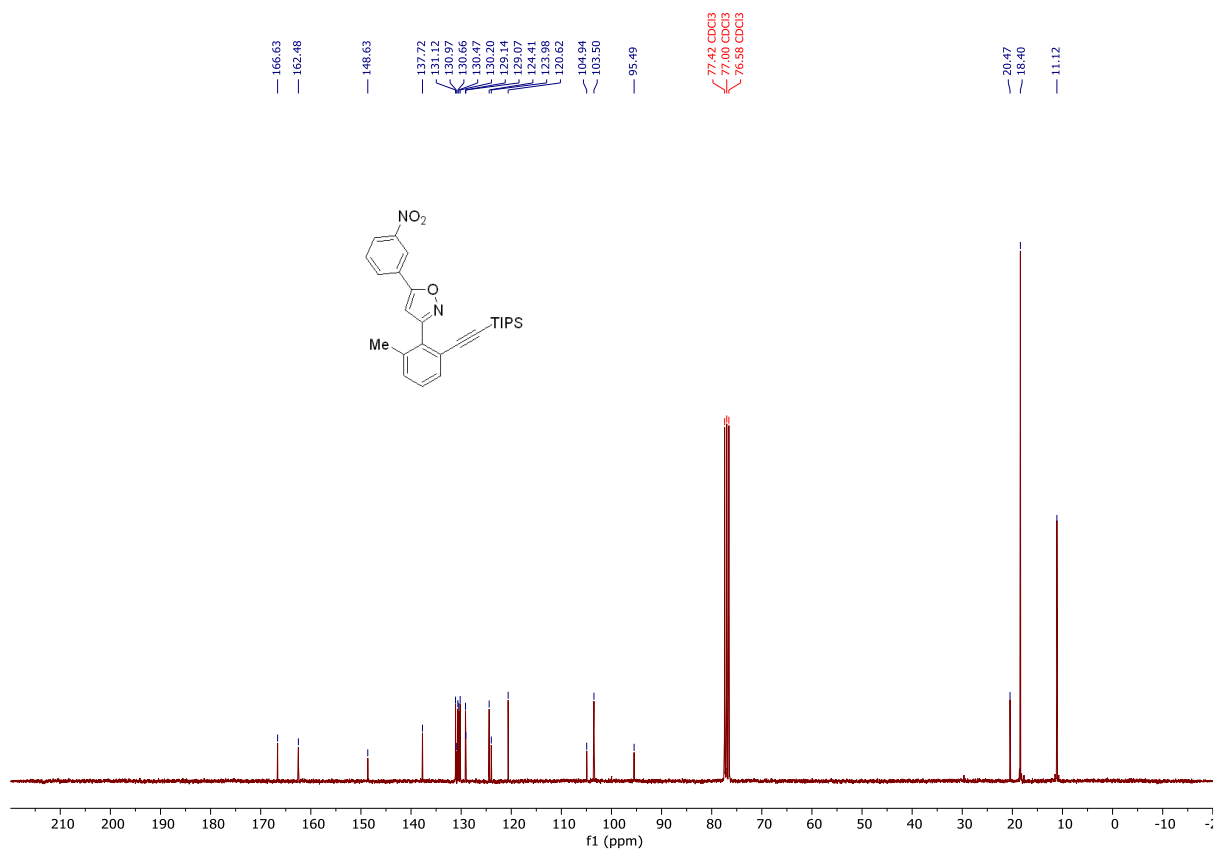

**(Z)-7-iodo-3-((triisopropylsilyl)methylene)isobenzofuran-1(3H)-one (5)**

**<sup>1</sup>H NMR (400 MHz, CDCl<sub>3</sub>)**

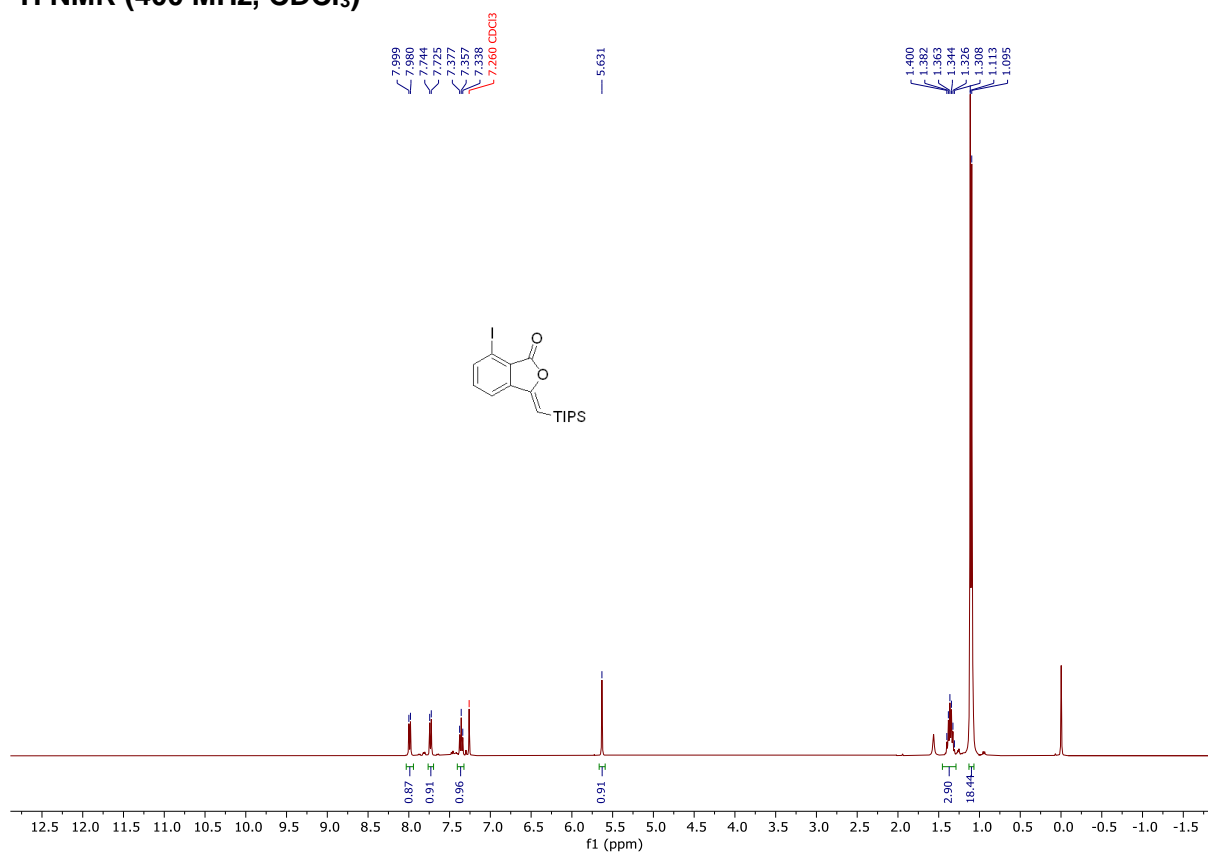

**<sup>13</sup>C NMR (101 MHz, CDCl<sub>3</sub>)**

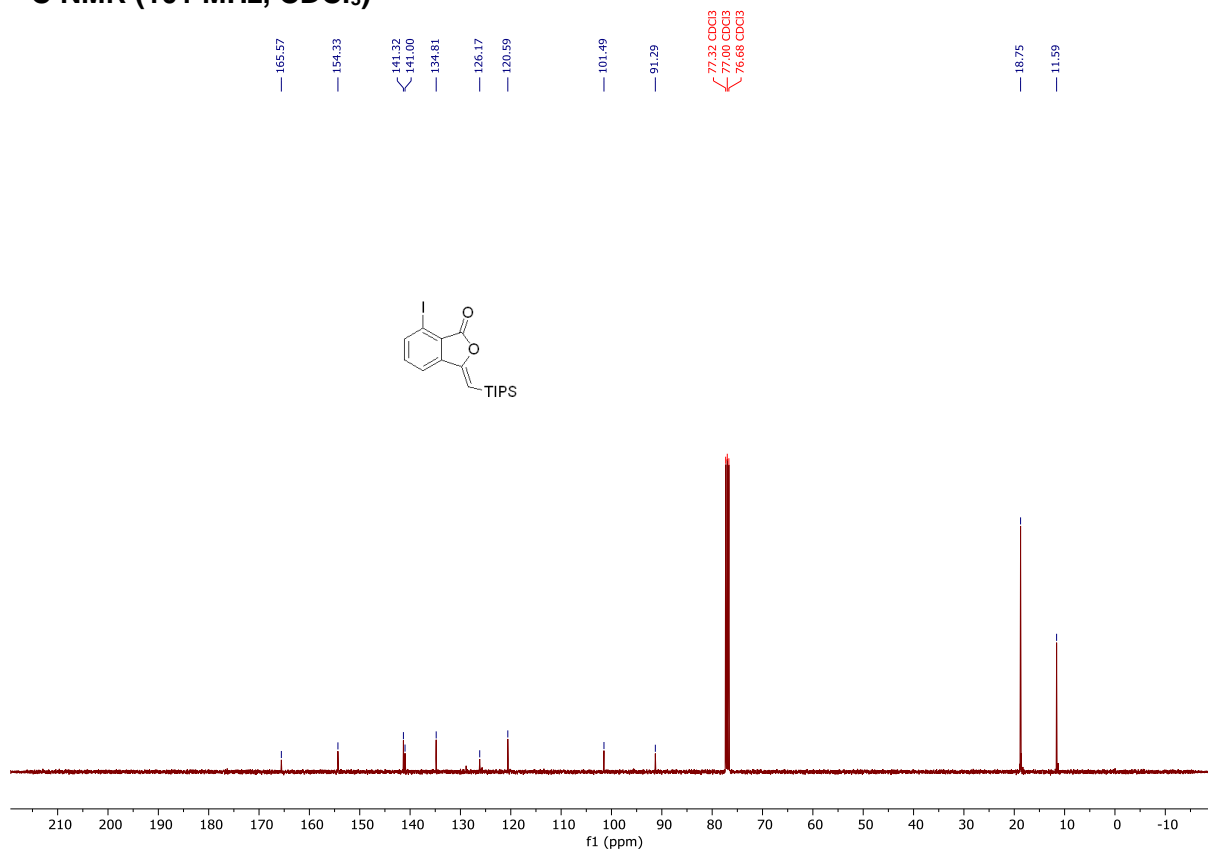

### 3-(2,6-diethynyl-4-methoxyphenyl)-5-phenylisoxazole (6)

<sup>1</sup>H NMR (300 MHz, CDCl<sub>3</sub>)

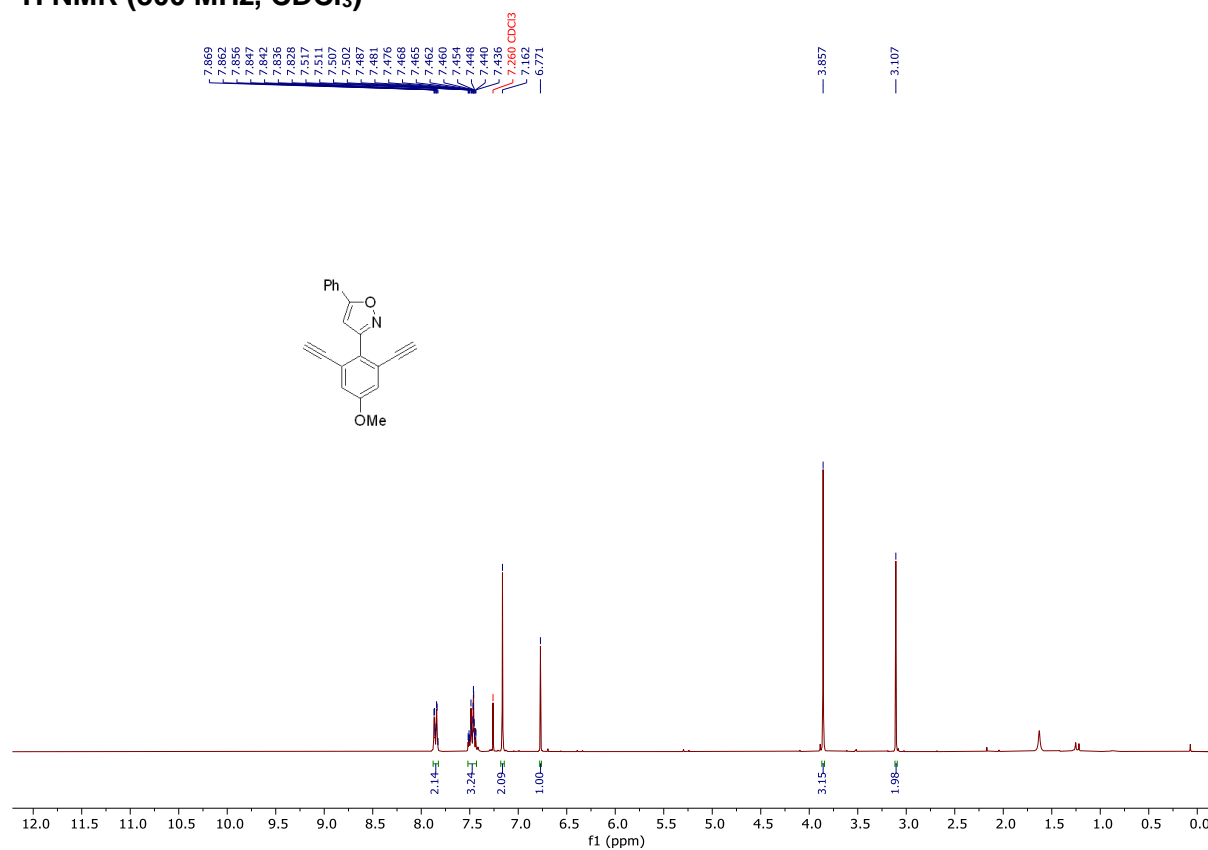

<sup>13</sup>C NMR (101 MHz, CDCl<sub>3</sub>)

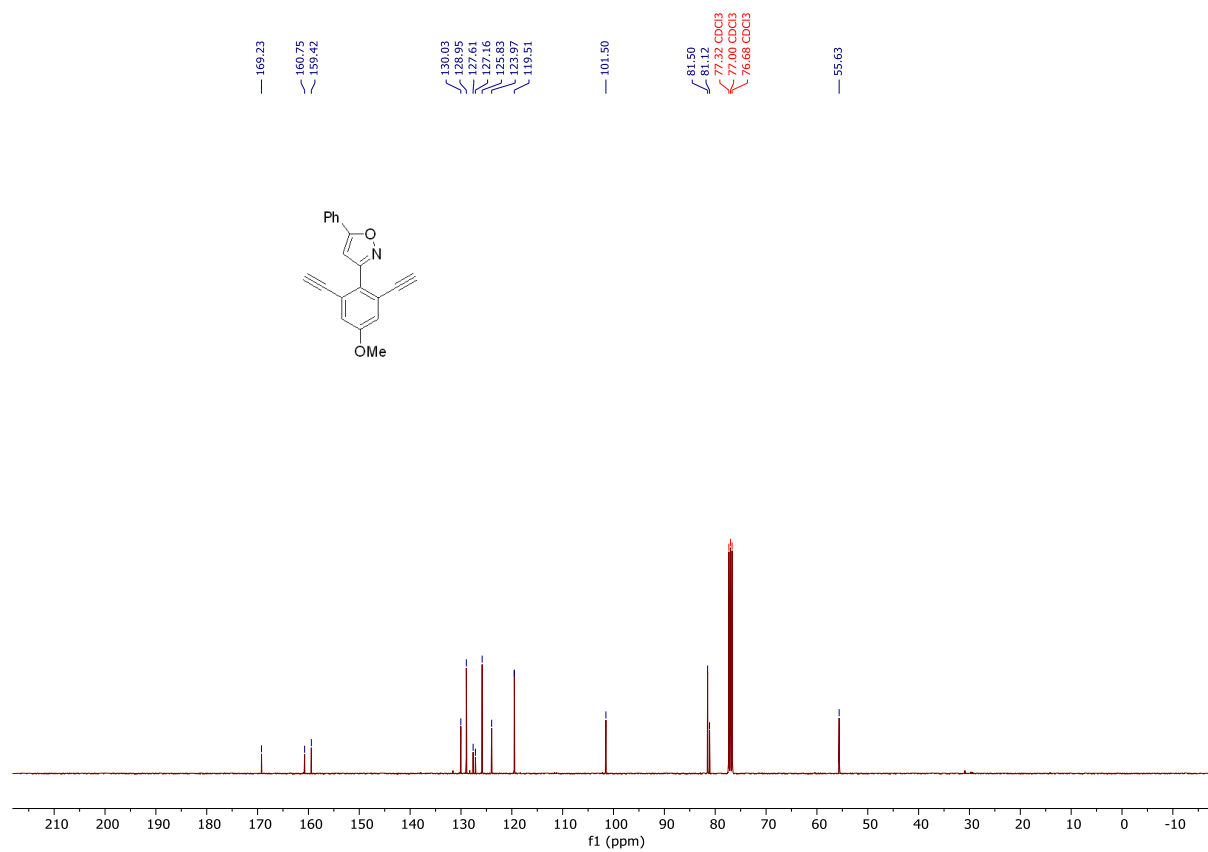

**3-(2,6-bis(1-benzyl-1H-1,2,3-triazol-4-yl)-4-methoxyphenyl)-5-phenylisoxazole (7)**  
**<sup>1</sup>H NMR (300 MHz, CDCl<sub>3</sub>)**

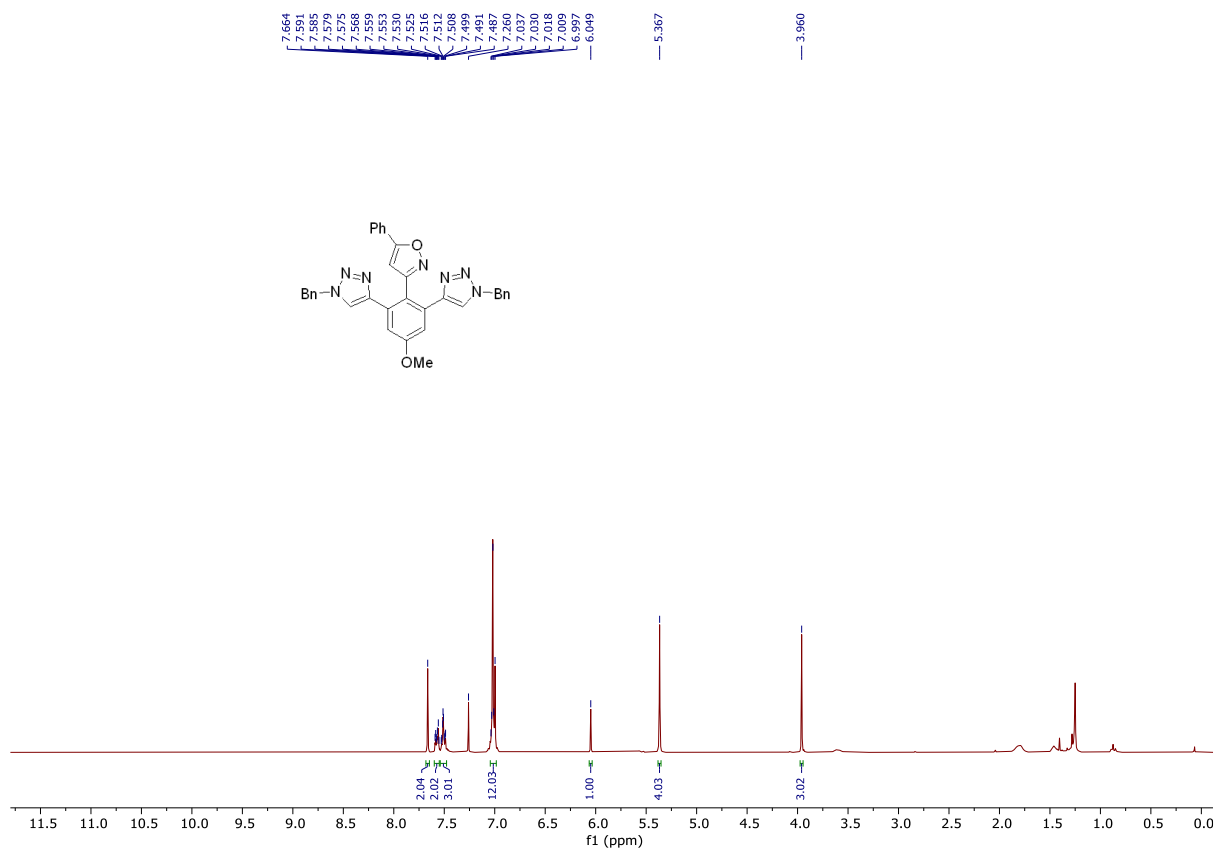

**<sup>13</sup>C NMR (75 MHz, CDCl<sub>3</sub>)**

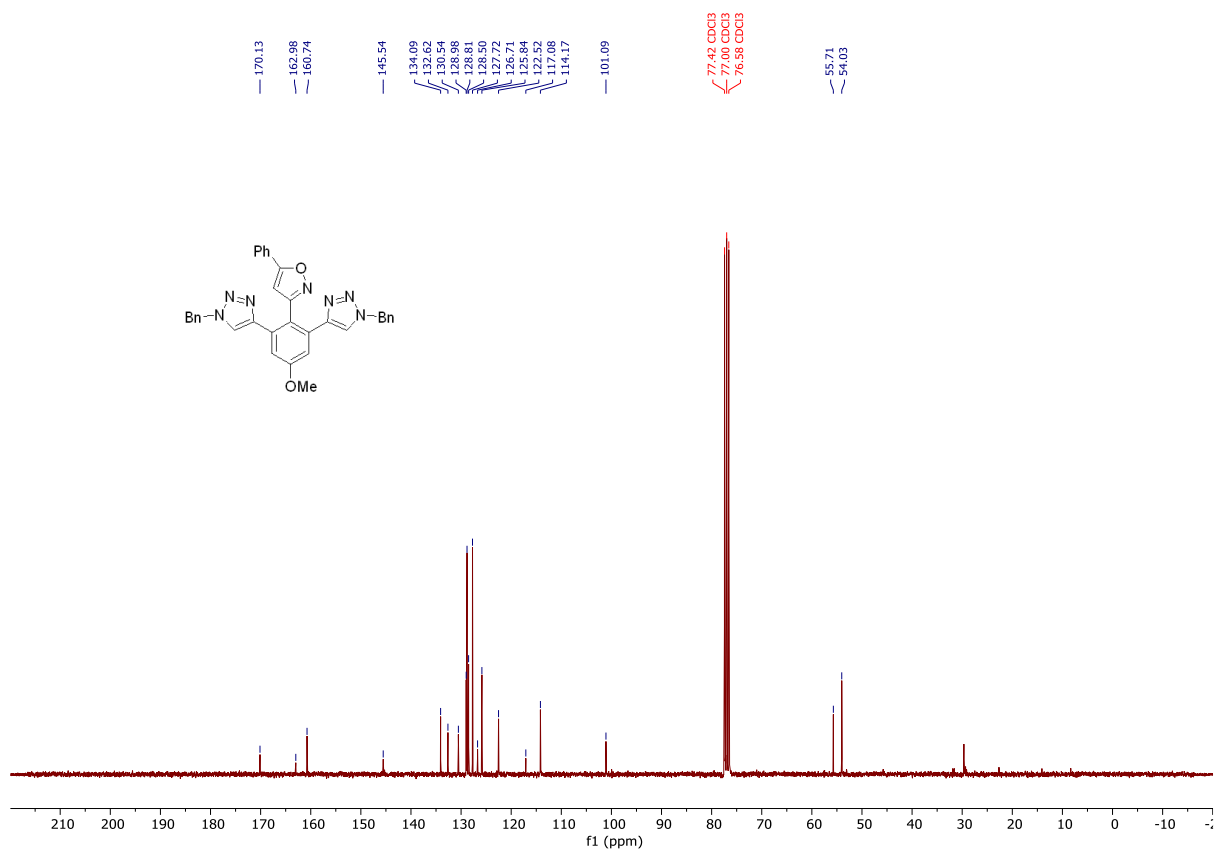

**5-phenyl-3-(4-(phenylethynyl)-2,6-bis((triisopropylsilyl)ethynyl)phenyl)isoxazole (8)**  
<sup>1</sup>H NMR (400 MHz, CDCl<sub>3</sub>)

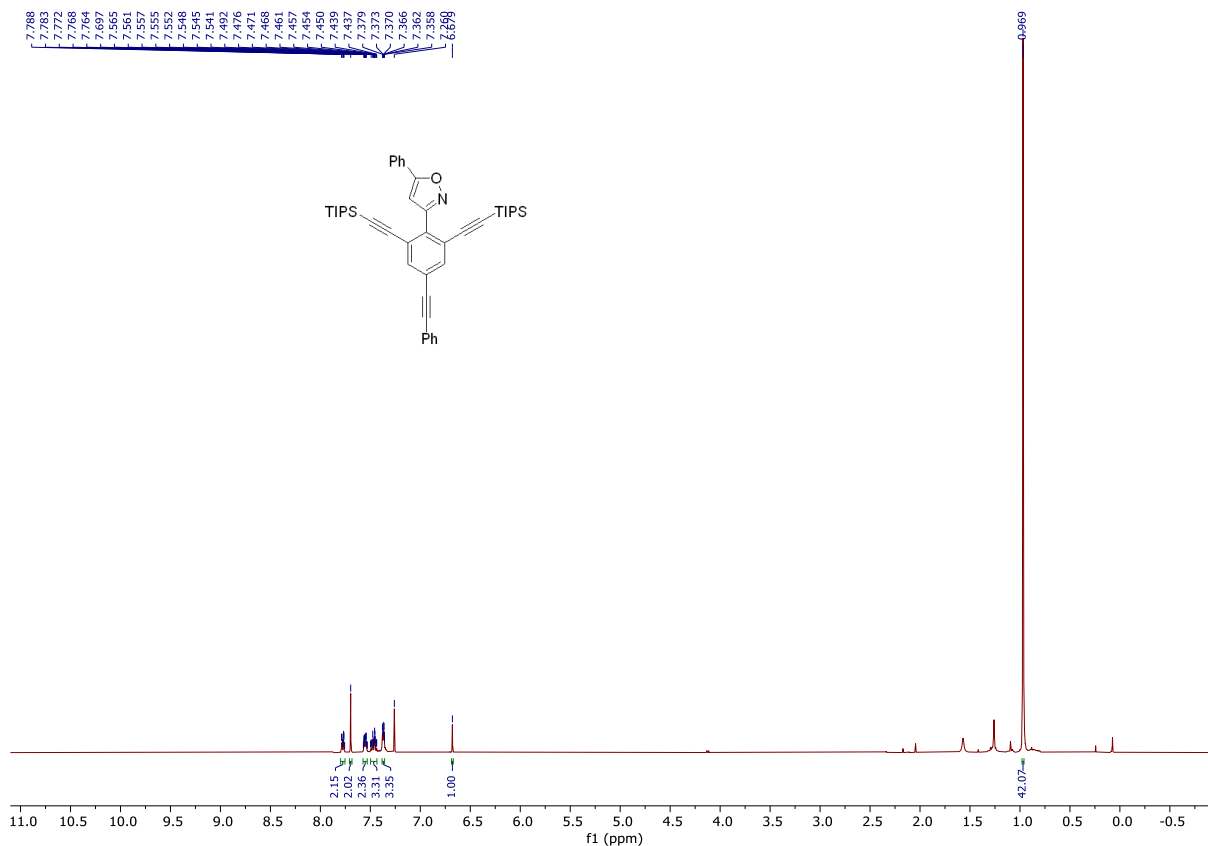

<sup>13</sup>C NMR (75 MHz, CDCl<sub>3</sub>)

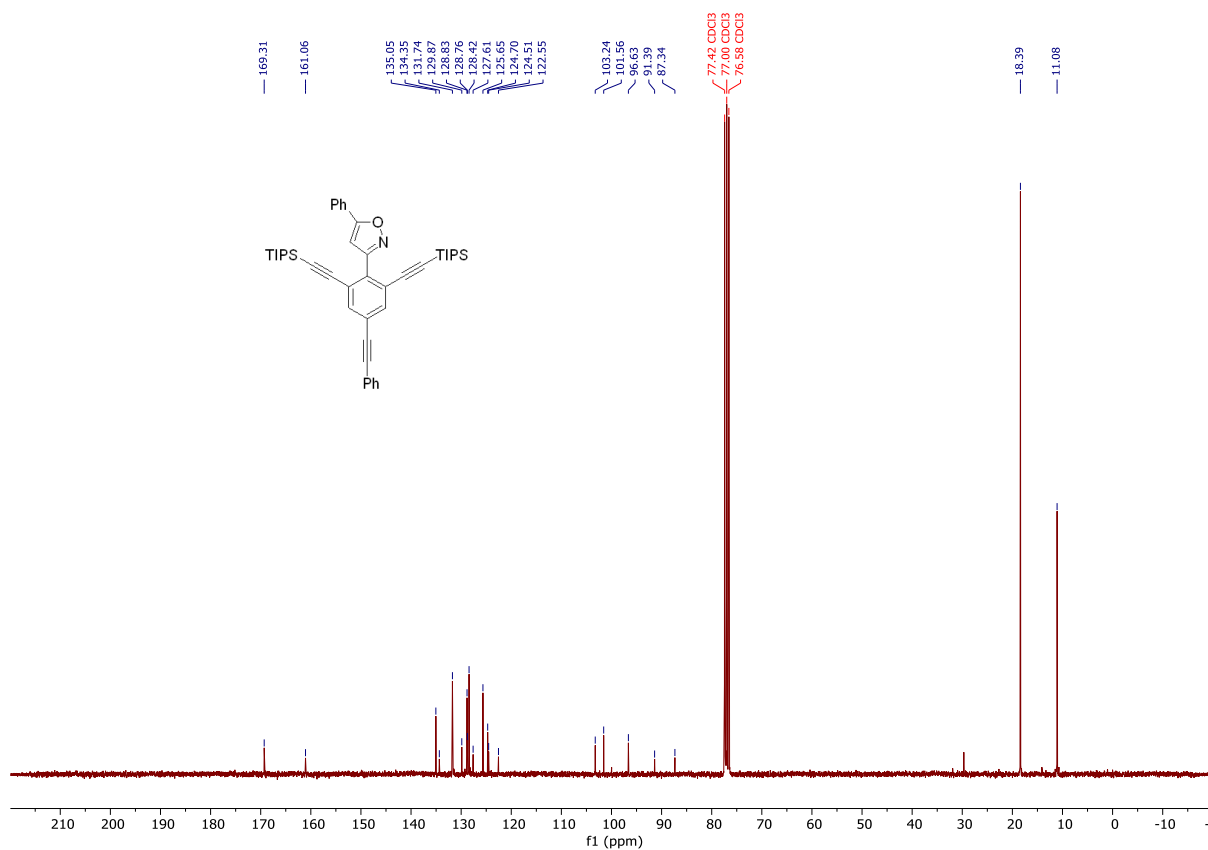

Supplement: d4ob00797b1.pdf [file d4ob00797b1.pdf]
